# Supplementary material
Source: publisher figshare collection journal article supplement (https://gsajournals.figshare.com/ndownloader/files/28864920)
Supplement: Supplementary file 1 [file 28864920]

## Sheet: Table S7
Table S7: CPM, TMM cross-sample normalised and filtered count matrix.
	embryo	embryo	embryo	1st instar larva	1st instar larva	1st instar larva	3rd instar larva	3rd instar larva	3rd instar larva	pupa	pupa	pupa	female adult	female adult	female adult	male adult	male adult	male adult
	NR01	NR02	NR03	NR04	NR05	NR06	NR07	NR08	NR09	NR10	NR11	NR12	NR13	NR14	NR15	NR16	NR17	NR18
maker-tulip_contig_807_pilon_pilon-augustus-gene-2.26-mRNA-1	13.0400537127199	14.5721099988461	14.997769654755	13.4065653737038	12.0708294625067	11.2376664918443	11.7560904425005	8.12182972016566	13.8212283145099	12.4898906557416	13.2901036423203	12.0834447939933	17.0447138799322	13.4858944782501	17.360955102275	15.4812726079531	14.4281761723443	13.1569375358377
augustus_masked-tulip_contig_753_pilon_pilon-processed-gene-0.2-mRNA-1	0	0	0.182899629936036	89.0133584695918	62.9191985733161	116.325034226389	309.57704831918	102.9441917031	85.0954057011003	31.0794953526594	40.0523671412392	36.2503343819799	21.447931632248	8.99059631883338	4.78539147049887	23.6089407271285	9.61878411489618	19.8335924047703
maker-tulip_contig_691_pilon_pilon-augustus-gene-3.0-mRNA-1	13.5230866882755	14.2547174659945	17.0480745063379	19.7435058672046	24.1401500713306	20.2688019819792	30.2784640507957	16.5969590331585	22.2440474520583	31.744654645721	32.5844212315409	35.6869633844417	29.5967252596789	30.7228655317467	22.3900676732481	31.2489487591533	32.4585869957172	33.0494416012163
maker-tulip_contig_147_pilon_pilon-augustus-gene-0.45-mRNA-1	1.6529645551335	0.798471780758692	1.28029740955225	5.30027003146431	4.07390494359601	4.55581073993689	8.21060284873051	4.87309783209939	3.25205372106116	7.11633304803884	4.18729292840228	4.23705207062102	5.96564985797626	2.49738786634261	4.22895060183621	9.28876356477186	5.2903312631929	10.0149823033989
augustus_masked-tulip_contig_659_pilon_pilon-processed-gene-1.3-mRNA-1	0	0	0	0.311780590086136	0.905312209688001	0.303720715995793	0.186604610198421	0.203045743004141	0.542008953510193	0	0	0	3.19588385248728	3.49634301287965	5.34183233916152	6.19250904318124	5.77127046893771	4.90930505068572
maker-tulip_contig_855_pilon_pilon-augustus-gene-2.25-mRNA-1	7.16284640557851	5.98853835569019	5.66988852801712	0.467670885129204	0.150885368281334	0.151860357997896	0	0.203045743004141	0	0.14523128669467	0.18205621427836	0.156927854467445	0	0	0	0	0	0.196372202027429
maker-tulip_contig_112_pilon_pilon-augustus-gene-0.2-mRNA-1	34.5285929294554	34.5339045178134	30.9100374591901	33.5164134342596	28.969990710016	29.1571887355961	5.59813830595262	16.2436594403313	12.1952014539793	9.14957106176422	6.91813614257768	6.74789774210015	21.8030298380799	15.4838047713242	20.6996003142509	11.8044703635642	11.0616017321306	9.42586569731659
maker-tulip_contig_199_pilon_pilon-augustus-gene-5.20-mRNA-1	0.367325456696334	0.399235890379346	0	45.0522952674467	46.1709226940881	43.1283416714026	11.7560904425005	10.9644701222236	13.5502238377548	2.03323801372538	0.36411242855672	1.56927854467445	1.91753031149237	3.49634301287965	1.22416991105785	7.16008858117831	4.80939205744809	3.92744404054858
maker-tulip_contig_706_pilon_pilon-augustus-gene-0.18-mRNA-1	0	0	0	0	0	0	0	0	0	0	0	0	0	0	0	65.4083767686019	94.2640843259826	75.996042184615
maker-tulip_contig_673_pilon_pilon-augustus-gene-1.25-mRNA-1	1.46930182678534	8.58357164315594	5.30408926814505	0	0	0	0	0	0	0	0	0	2.62772672315621	0.499477573268521	9.7933592884628	21.8672975587338	35.5895012251159	29.0630859000595
maker-tulip_contig_153_pilon_pilon-augustus-gene-1.18-mRNA-1	1482.8928686831	1219.86526305409	1356.56655523558	390.816969672971	415.689189615074	369.476251008882	232.322739697034	234.720878912787	230.895814195342	574.244507590726	554.543228691885	588.008670689518	162.42191934752	165.327076751881	178.172366145783	215.963752880946	241.431481283894	237.610364453189
maker-tulip_contig_807_pilon_pilon-augustus-gene-3.80-mRNA-1	229.027422250164	202.212978477139	228.624537420045	24.9424472068909	19.464212508292	17.7676618857539	63.2589628572646	34.3147305676999	47.9677923856521	184.879427962315	180.781820778412	221.582130508033	6.2497284226418	4.49529815941669	4.34023877556874	11.4174385483654	14.4281761723443	11.1932155155634
maker-tulip_contig_191_pilon_pilon-augustus-gene-0.63-mRNA-1	0	0	0	0.155890295043068	0	0.303720715995793	7.83739362833367	4.87309783209939	4.33607162808154	0	0	0	0	0	0	0	0	0
maker-tulip_contig_361_pilon_pilon-augustus-gene-1.53-mRNA-1	67.2205585754291	39.3247352023656	78.4639412425595	52.8468100196001	49.3395154279961	47.9878731273352	43.6654787864304	40.8121943438324	44.1737297110807	81.6199831224046	77.5559472825814	83.3286907222135	62.9944217145827	59.9373087922226	61.5423600740901	48.7660087150523	52.4223734261842	57.1443107899818
augustus_masked-tulip_contig_474_pilon_pilon-processed-gene-4.12-mRNA-1	0	0	0.182899629936036	4.67670885129204	2.56505126078267	3.49278823395162	30.8028230054533	11.1675158652278	28.9974790127953	43.133692148317	28.0366569988675	8.3171762867746	16.5475763917675	11.9874617584445	4.45152694930127	56.5066450190288	12.504419349365	26.5102472737029
maker-tulip_contig_209_pilon_pilon-augustus-gene-2.46-mRNA-1	21.0587684324008	29.2400366113833	25.240148931173	33.720629720766	34.3581072113425	39.3834652431744	10.1718173019159	9.3401041781905	12.4662059307344	24.307360454087	38.2773190520252	27.4011726685606	5.82219018282017	7.49216359902782	10.1094177018632	22.8580990056428	21.9163996057909	28.4759330159975
augustus_masked-tulip_contig_430_pilon_pilon-processed-gene-0.20-mRNA-1	2.02029001182984	0.798471780758692	0.731598519744144	220.584767485941	309.918546449859	429.916673492045	24.8184131563899	358.781827888318	30.0814969198157	0.580925146778681	0	0.470783563402336	0.426117846998304	0.499477573268521	0.779017216127722	0.774063630397655	0	0.785488808109716
maker-tulip_contig_259_pilon_pilon-augustus-gene-0.0-mRNA-1	0	0	0	13.5624556687469	14.484995355008	10.326504343857	8.95702128952419	2.63959465905384	4.06506715132645	0.14523128669467	0.9102810713918	0.156927854467445	0.710196411663841	0.998955146537043	0.222576347465064	6.19250904318124	2.40469602872404	4.51656064663087
augustus_masked-tulip_contig_391_pilon_pilon-processed-gene-0.1-mRNA-1	2.203952740178	0.199617945189673	0	17.4597130448236	11.769058725944	16.4009186637728	4.85171986515894	3.85786911707869	4.06506715132645	2.17846930042005	2.00261835706196	1.41235069020701	0.923255335162993	1.99791029307409	1.33545808479038	3.67680224438886	1.44281761723443	1.17823321216457
maker-tulip_contig_80_pilon_pilon-augustus-gene-0.51-mRNA-1	43.3444038901674	44.3151838321074	52.1263945317703	9.82108858771328	9.20400746516134	7.89673861589061	15.8613918668658	19.8984828144059	14.092232791265	14.3778973827723	14.7465533565472	12.7111562118631	39.4869204885095	33.9644749822594	42.7346587132922	8.70821584197362	9.61878411489618	5.49842165676801
maker-tulip_contig_23_pilon_pilon-augustus-gene-0.43-mRNA-1	84.8521804968532	130.150900263667	150.709295067294	59.8618732965381	67.8984157266001	73.0448321969881	73.3356118079793	70.4568728224371	71.5451818633455	140.002960373662	116.151864709594	116.754323723779	93.6749066984606	90.9049183348709	90.9224379394785	84.3729357133444	88.0118746513	90.3312129326173
augustus_masked-tulip_contig_72_pilon_pilon-processed-gene-0.1-mRNA-1	4.40790548035601	5.78892041050052	2.74349444904054	3.8972573760767	2.715936629064	2.12604501197055	3.98960656604223	3.65482337407455	3.25205372106116	8.71532951454716	6.44296942331116	8.22458885263881	4.43446639442902	6.26344876878726	3.64134904452844	6.57954085838007	1.54381485044084	7.4621436770423
augustus_masked-tulip_contig_508_pilon_pilon-processed-gene-1.65-mRNA-1	0	0	0	0	0	0.151860357997896	0	0	0	0.14523128669467	0	0	0.142039282332768	0.499477573268521	0	9.28876356477186	5.77127046893771	3.92744404054858
maker-tulip_contig_147_pilon_pilon-augustus-gene-1.42-mRNA-1	51.7928893941831	39.7239710927449	50.2973982324099	79.0363795868355	85.4011184472348	92.0273769467252	99.833466456155	218.274173729452	122.765027970059	16.1206728231084	23.4852516419085	15.2220018833422	32.3139367307048	26.9717889565001	36.7250973317355	35.2198951830933	46.6511029572465	43.3982566480618
maker-tulip_contig_247_pilon_pilon-augustus-gene-2.69-mRNA-1	0	0	0	2.18246413060295	1.810624419376	2.27790536996845	12.5025088832942	5.68528080411596	7.8591298258978	9.14957106176422	6.18991128546424	6.9048255965676	2.05956959382514	0.998955146537043	0.333864521197595	0.580547722798241	1.44281761723443	3.14195523243886
maker-tulip_contig_931_pilon_pilon-augustus-gene-1.34-mRNA-1	38.9364984098114	21.7583560256744	37.1286248770153	33.6723037293027	39.833737226272	38.2688102154699	42.3592465150415	59.2893569572093	46.0707610483664	25.2702438848726	34.0445120700533	30.7578594756193	16.7606353152666	12.486939331713	12.6868518055086	28.059806601915	37.0323188423503	32.5977855365532
maker-tulip_contig_516_pilon_pilon-augustus-gene-2.14-mRNA-1	0	0.798471780758692	0.182899629936036	10.9123206530148	15.5411929329774	14.1230132938044	16.421205697461	25.5837636185218	8.94314773291818	7.84248948151219	15.8388906422173	8.78795985017694	28.8339743135519	36.9613404218706	29.2687896916559	93.4681833705169	110.135078115561	76.1924143866424
maker-tulip_contig_862_pilon_pilon-augustus-gene-1.57-mRNA-1	11.3870891575864	20.3610304093466	11.1568774260982	135.15688580234	117.388816522877	126.803398928243	111.216347678259	188.832540993851	110.840830992834	67.0968544529376	58.6221009976319	50.8446248474523	67.1845805433993	63.4336518051022	67.6632096293793	111.465162777262	75.507455301935	85.4219078819316
maker-tulip_contig_396_pilon_pilon-augustus-gene-0.15-mRNA-1	13.4073791694162	10.978986985432	18.1070633636676	9.50930799762715	16.748275879228	9.11162147987378	11.9426950526989	15.2284307253106	11.6531925004691	89.0267787438328	86.1125893536643	84.7410414124205	314.332931802416	456.522501967428	352.894798905858	72.7619812573796	52.903312631929	54.7878443656527
augustus_masked-tulip_contig_618_pilon_pilon-processed-gene-0.3-mRNA-1	1.28563909843717	2.39541534227608	5.66988852801712	107.564303579717	118.143243364284	88.8383094287694	28.7371099705568	22.1319859874514	22.2223670939179	9.7304962085429	12.1977663566501	12.2403726484607	4.82933559931412	5.99373087922226	5.78698503409165	6.57954085838007	5.2903312631929	8.05126028312459
maker-tulip_contig_843_pilon_pilon-augustus-gene-8.22-mRNA-1	3.12226638191884	2.1957973970864	1.46319703948829	22.1364218961157	21.8783784007934	20.501148329716	22.9523670544057	30.6599071936253	28.7264745360402	159.899646650832	107.777278852789	123.659149320347	12.3574175629508	10.9885066119075	15.8029206700195	18.5775271295437	19.7185074355372	17.869870384496
augustus_masked-tulip_contig_238_pilon_pilon-processed-gene-0.6-mRNA-1	6.15453802694708	6.87883439123613	7.57936066454934	1.06784852104502	1.34438863138668	1.21488286398317	3.72836011176444	2.8487317743481	3.79406267457135	2.45876568374077	0.915742757820151	0.462937170678964	0.867149818641549	1.49843271980556	1.78061077972051	0.578612563722247	2.40469602872404	1.374605414192
augustus_masked-tulip_contig_623_pilon_pilon-processed-gene-0.6-mRNA-1	0	2.39541534227608	0	0.311780590086136	1.357968314532	1.51860357997896	2.79906915297631	8.52792120617394	5.42008953510193	14.3778973827723	5.64374264262916	6.74789774210015	56.6026540096081	8.99059631883338	9.01434207233507	54.1844541278359	22.604142670006	25.3320140615383
maker-tulip_contig_667_pilon_pilon-augustus-gene-0.24-mRNA-1	0	0	0	12.9388944885746	29.7244175514227	15.6416168737833	32.842411394922	64.1624547893087	30.3525013965708	43.133692148317	50.7936837836625	47.0783563402336	50.850063075131	56.9404433526114	92.3691841980014	201.837091626189	208.246676087502	173.39665439022
maker-tulip_contig_321_pilon_pilon-augustus-gene-0.7-mRNA-1	3.85691729531151	2.79465123265542	1.82899629936036	9.97697888275635	12.3726001990693	12.3006889978296	12.6891134934926	10.5583786362154	16.802277558816	8.2781833415962	5.09757399979408	5.33554705189314	10.4398872514585	14.9843271980556	10.461088330858	13.9331453471578	5.2903312631929	9.03312129326173
maker-tulip_contig_394_pilon_pilon-augustus-gene-1.3-mRNA-1	89.9947368906019	68.2693372548682	51.5776956419622	62.5120083122703	81.4780988719201	72.7411114809923	110.283324627267	109.035563993224	92.683531050243	19.1705298436965	19.2979587135062	18.3605589726911	51.773318410294	49.4482797535836	51.3038480906971	34.0587997374968	22.604142670006	24.1537808493738
maker-tulip_contig_199_pilon_pilon-augustus-gene-0.13-mRNA-1	19.6519119332539	26.5491867102265	24.3256507814928	44.8964049724036	40.7390494359601	39.4836930794531	38.6271543110731	47.5127038629691	32.2495327338565	20.3323801372538	13.1080474280419	18.0467032637562	17.5418513680969	15.4838047713242	17.0270905810774	21.0932339283361	15.3900545838339	20.4227090108526
maker-tulip_contig_931_pilon_pilon-augustus-gene-1.31-mRNA-1	270.167873400154	276.071618197318	229.356135939789	122.062101018722	91.5874185467695	101.898300216588	44.9717110578194	46.0913836619401	50.9488416299581	121.994280823523	134.175429923151	131.348614189252	65.1250109495742	58.9383536456855	75.1195172694589	49.7335882530493	44.2464069285224	43.0055122440069
augustus_masked-tulip_contig_525_pilon_pilon-processed-gene-0.5-mRNA-1	36.5488829412852	30.7411635592096	27.4349444904054	14.9654683241345	20.5204100862614	17.7676618857539	12.1292996628973	17.6649796413603	16.2602686053058	14.958822529551	11.4695414995367	15.6927854467445	35.4388009420257	44.4535040208984	36.613809158003	12.1915021787631	20.199446641282	17.2807537784137
augustus_masked-tulip_contig_247_pilon_pilon-processed-gene-2.160-mRNA-1	77.8729968196228	89.6284573901632	91.8156142278901	16.2125906844791	18.558900298604	19.1344051077349	28.7371099705568	28.0203125345715	34.6885730246523	28.4653321921554	32.2239499272697	31.5424987479565	83.5901176528341	68.9279051110559	79.5710442187602	9.8693112875701	16.3519329953235	10.4077267074537
augustus_masked-tulip_contig_227_pilon_pilon-processed-gene-0.22-mRNA-1	2.75494092522251	0.798471780758692	1.28029740955225	2.02657383555988	3.01770736562667	2.88534680196003	2.98567376317473	8.3248754631698	7.3171208723876	0.435693860084011	1.27439349994852	0.941567126804672	1.42039282332768	0.998955146537043	0.890305389860254	0.193515907599414	0	0.196372202027429
maker-tulip_contig_86_pilon_pilon-augustus-gene-0.42-mRNA-1	0	0	0	3.4295864909475	6.03541473125334	3.49278823395162	0.373209220396841	1.01522871502071	0.271004476755096	0.435693860084011	0.18205621427836	0.470783563402336	0.213058923499152	0.499477573268521	0.111288173732532	0.580547722798241	0.961878411489618	0.589116606082287
maker-tulip_contig_603_pilon_pilon-augustus-gene-1.30-mRNA-1	0	0	0	0	0	0	0.373209220396841	0	0.271004476755096	0	0	0	0	0	0	8.12766811917538	7.21408808617213	5.30204945474058
maker-tulip_contig_429_pilon_pilon-augustus-gene-1.31-mRNA-1	16.529645551335	16.3686715055532	18.6557622534757	10.6005400629286	10.5619757796933	10.4783647018548	10.63646278131	7.71573823415737	7.3171208723876	13.3612783759097	16.5671154993308	11.7695890850584	22.6552655320765	33.9644749822594	32.8300112510969	6.19250904318124	7.69502729191694	5.89116606082287
maker-tulip_contig_280_pilon_pilon-augustus-gene-1.80-mRNA-1	10.6524382441937	7.18624602682823	12.2542752057144	6.85917298189499	6.33718546781601	6.98557646790323	9.14362589972261	7.30964674814909	7.8591298258978	37.6149032539196	34.9547931414451	32.3271380202937	23.3654619437404	21.4775356505464	27.0430262170052	21.0932339283361	23.5660210814956	29.8485747081692
augustus_masked-tulip_contig_72_pilon_pilon-processed-gene-0.12-mRNA-1	14.5093555395052	16.7679073959325	16.4609666942433	55.6528353303753	55.0731594226867	61.3515846311501	14.7417642056752	20.10152855741	21.4093536636526	21.2037678574218	24.2134764990219	19.7729096628981	17.3998120857641	12.486939331713	17.1383787548099	79.1480062081602	72.6218200674662	63.0354768508047
maker-tulip_contig_281_pilon_pilon-augustus-gene-3.36-mRNA-1	61.1596885399396	51.7010478041253	71.1479560451181	9.35341770258408	17.200931984072	13.211851145817	8.77041667932577	11.7766530942402	13.0082148842446	38.0505971140036	35.8650742128369	36.5641900909148	26.064208308063	27.9707441030372	30.2703832552486	34.6393474602951	48.5748597802257	43.2018844460344
augustus_masked-tulip_contig_473_pilon_pilon-processed-gene-0.26-mRNA-1	0.367325456696334	0.199617945189673	0	2047.30724480061	1864.18872511588	641.76187289911	201.346374404096	51.1675272370436	149.052462215303	4489.24430301895	4763.13673416473	4985.2840807218	125.207627376335	48.4493246070466	31.605841340039	234.734795918089	98.5925371776858	185.375358713893
maker-tulip_contig_623_pilon_pilon-augustus-gene-4.54-mRNA-1	12.121740070979	8.98280753353528	26.5204463407252	5.61205062155045	7.39338304578534	6.52999539390954	5.59813830595262	13.8071105242816	7.8591298258978	34.5650462333315	26.2160948560839	31.5424987479565	24.0756583554042	18.9801477842038	21.5899057041112	43.7345951174675	79.3549689478935	47.9148172946927
augustus_masked-tulip_contig_86_pilon_pilon-processed-gene-0.13-mRNA-1	0	0	0	14.1860168489192	15.2394221964147	16.7046393797686	7.2775797977384	12.994927552265	8.40113877940799	1.16185029355736	3.45906807128884	1.09849498127212	6.60482662847372	7.99164117229634	5.78698503409165	17.8034634991461	10.5806625263858	9.81861010137145
maker-tulip_contig_483_pilon_pilon-augustus-gene-0.3-mRNA-1	1.28563909843717	0.399235890379346	1.09739777961622	21.0451898308142	13.7305685136014	14.7304547257959	14.7417642056752	7.10660100514495	13.2792193609997	86.2673842966341	102.861761067273	94.3136405349346	3.40894277598644	1.99791029307409	2.55962799584823	9.09524765717245	12.9853585551098	9.42586569731659
maker-tulip_contig_196_pilon_pilon-augustus-gene-2.6-mRNA-1	3.12226638191884	4.99044862974182	5.66988852801712	15.9008100943929	17.3518173523534	17.1602204537623	13.0623227138894	13.6040647812775	10.2981701166937	9.44003363515356	9.83103557103144	9.72952697698161	46.0207274758169	57.4399209258799	43.5136759294199	35.6069269982921	42.803589311288	43.2018844460344
maker-tulip_contig_854_pilon_pilon-augustus-gene-2.30-mRNA-1	4.77523093705234	3.79274095860379	7.68178445731352	138.898252883374	168.086300265406	132.725952890161	29.4835284113505	35.939096511733	28.9974790127953	43.5693860084011	43.3293789982497	48.8045627393755	29.0470332370511	25.9728338099631	28.4897724755281	12.3850180863625	10.5806625263858	12.7641931317829
maker-tulip_contig_3_pilon_pilon-augustus-gene-6.20-mRNA-1	1759.85626303214	1120.05629045926	1778.33310186808	1431.69646967554	1531.18471731897	1214.73100362517	1128.39807786985	727.918988669847	872.0924061979	512.085516885407	654.310034116426	601.033682610316	1509.52247299149	1320.1192261487	1178.20789530631	3216.62141611746	2864.47390941608	3392.13341782181
maker-tulip_contig_583_pilon_pilon-augustus-gene-1.24-mRNA-1	0	0	0	20.733409240728	21.4257222959494	20.3492879717181	8.95702128952419	6.70050951913667	7.8591298258978	0.14523128669467	0.54616864283508	0.313855708934891	0.284078564665536	0	0.556440868662659	0.580547722798241	0.961878411489618	1.57097761621943
maker-tulip_contig_59_pilon_pilon-augustus-gene-0.54-mRNA-1	1.6529645551335	1.4671918971441	1.89666916243669	2.26976269582707	3.21687605175803	4.51480844327746	2.85131844383187	1.30558412751663	11.5339505306969	12.3693486877851	10.861473743847	15.5829359486173	2.61210240209961	0	4.69858669498749	9.37197540503961	10.5758531343283	9.00955662901844
maker-tulip_contig_121_pilon_pilon-augustus-gene-4.47-mRNA-1	53.0785284926203	67.0716295837301	67.8557627062694	24.7865569118478	16.748275879228	23.2346347736781	33.0290160051204	36.5482337407455	29.5394879663055	25.4154751715673	25.1237575704137	22.2837553343772	78.1216052830225	82.413799589306	90.9224379394785	30.7690293083068	33.6657444021366	37.1143461831841
maker-tulip_contig_22_pilon_pilon-augustus-gene-0.12-mRNA-1	9.73412460245285	12.7755484921391	5.12118963820901	1.24712236034454	1.05619757796933	1.82232429597476	1.86604610198421	2.84264040205798	1.62602686053058	0.435693860084011	0.9102810713918	1.56927854467445	0.994274976329377	2.49738786634261	2.67091616958076	0.580547722798241	0.480939205744809	0
maker-tulip_contig_252_pilon_pilon-augustus-gene-1.6-mRNA-1	0	0	0	0	0.150885368281334	0.151860357997896	0	0	0	0	0	0.470783563402336	0	0	0	69.8592426433884	117.349166201733	74.4250645683956
augustus_masked-tulip_contig_491_pilon_pilon-processed-gene-0.0-mRNA-1	194.131503864013	100.607444375595	162.963570273008	0.155890295043068	0	0.151860357997896	0	0	1.08401790702039	157.140252203633	157.66068156506	123.345293611412	2.13058923499152	2.49738786634261	1.11288173732532	4.45086587478652	1.44281761723443	3.53469963649372
augustus_masked-tulip_contig_187_pilon_pilon-processed-gene-1.23-mRNA-1	17.9989473781204	14.7717279440358	33.8364315381667	24.0071054366325	25.1978565029827	21.2604501197055	11.9426950526989	10.3553328932112	10.8401790702039	6.39017661456549	4.73346157123736	6.27711417869781	2.98282492898813	4.99477573268521	2.4483398221157	1.54812726079531	1.44281761723443	2.749210828384
maker-tulip_contig_33_pilon_pilon-augustus-gene-0.24-mRNA-1	8.81581096071202	4.99044862974182	5.30408926814505	2.80602531077522	3.92301957531467	4.40395038193899	2.42585993257947	0.812182972016566	1.62602686053058	7.40679562142818	8.55664207108292	6.9048255965676	3.83506062298474	2.99686543961113	6.23213772902178	7.74063630397655	3.84751364595847	5.49842165676801
maker-tulip_contig_691_pilon_pilon-augustus-gene-0.37-mRNA-1	3.30592911026701	6.58739219125921	6.03568778788919	11.379991538144	11.4672879893813	12.1488286398317	15.1149734260721	9.94924140720293	12.7372104074895	18.0086795501391	15.1106657851039	14.1235069020701	19.8144798854212	23.974923516889	19.1415658819955	8.90173174957303	10.5806625263858	12.1750765257006
maker-tulip_contig_593_pilon_pilon-augustus-gene-0.13-mRNA-1	2.203952740178	2.1957973970864	1.46319703948829	20.8892995357711	16.4465051426654	13.3637115038149	13.6221365444847	10.3553328932112	14.6342417447752	17.4277544033604	17.4773965707226	21.6560439165075	11.1500836631223	6.9926860257593	9.90464746219533	13.3525976243596	12.9853585551098	12.9605653338103
maker-tulip_contig_674_pilon_pilon-augustus-gene-3.9-mRNA-1	1.81458775607989	1.79656150670706	1.24005949096632	3.85516699641507	2.41416589250134	2.82004684802094	6.53116135694472	9.51472351717407	4.66127700018766	11.3193264849826	7.35689161898853	6.57841565927531	1.74424238704639	1.84806702109353	3.52672222558393	6.91625853760305	8.17596649766175	3.92744404054858
augustus_masked-tulip_contig_691_pilon_pilon-processed-gene-2.11-mRNA-1	107.25903335533	137.536764235685	118.701859828487	74.9832319157157	72.7267475116028	77.1450618629313	59.5268706532962	58.2741282421886	56.9109401185703	167.742136132344	200.079779491918	170.894433515048	129.681864769817	113.880886705223	119.634786762472	188.871525817028	115.906348584499	152.188456571257
maker-tulip_contig_448_pilon_pilon-augustus-gene-0.53-mRNA-1	60.425037626547	64.3109134017569	68.7702608559496	11.6917721282301	10.7128611479747	9.56720255386747	14.7417642056752	16.8527966693437	17.3442865123262	24.4017607904385	33.6803996414966	25.5792402781936	19.7434602442548	17.4817150643982	20.3657357930533	11.0304067331666	10.099723320641	12.371448727728
maker-tulip_contig_145_pilon_pilon-augustus-gene-5.36-mRNA-1	1.28563909843717	1.19770767113804	2.37769518916847	5.61205062155045	4.07390494359601	5.16325217192848	6.15795213654788	3.85786911707869	5.96209848861212	9.58526492184823	3.45906807128884	6.12018632423037	8.4513372987997	11.487984185176	7.90146033500976	3.09625452159062	5.77127046893771	5.69479385879544
maker-tulip_contig_290_pilon_pilon-augustus-gene-0.31-mRNA-1	5.50988185044501	5.38968452012117	4.38959111846487	11.6917721282301	13.127027040476	7.74487825789271	15.1149734260721	20.5076200434183	12.4662059307344	4.06647602745077	2.7308432141754	3.29548494381635	5.3264730874788	4.99477573268521	6.00956138155671	3.87031815198828	5.2903312631929	2.35646642432915
augustus_masked-tulip_contig_907_pilon_pilon-processed-gene-5.30-mRNA-1	9.55046187410469	4.79083068455215	11.1568774260982	15.4331392092637	14.032339250164	14.2748736518023	5.78474291615104	7.30964674814909	7.04611639563251	14.087434809383	12.9259912137636	14.7512183199399	11.1500836631223	12.486939331713	11.2401055469857	5.22492950518417	7.21408808617213	6.28391046487773
maker-tulip_contig_288_pilon_pilon-augustus-gene-0.9-mRNA-1	48.6706230122643	46.5109812291938	46.4565060037532	22.915873371331	22.4819198739187	24.6013779956592	37.8807358702794	56.6497622981554	39.0246446527339	9.29480234845889	8.37458585680456	7.84639272337227	16.4765567506011	15.9832823445927	21.144753009181	19.7386225751402	14.4281761723443	11.7823321216457
maker-tulip_contig_237_pilon_pilon-augustus-gene-0.42-mRNA-1	6.61185822053401	5.58930246531084	7.49888482737748	47.2347593980496	59.9014912076894	52.9992649412658	40.3065958028589	46.7005208909525	32.5205372106116	81.3295205490153	67.1787430687149	71.2452459282202	31.248642113209	31.9665646891854	29.936518734051	30.381997493108	38.9560756653295	33.7760187487178
augustus_masked-tulip_contig_555_pilon_pilon-processed-gene-2.105-mRNA-1	19.4682492049057	10.5797510950527	27.0691452305333	69.6829618842514	65.7860205706614	79.2711068749019	49.8234309229783	53.8071218960975	45.5287520948562	93.0932547712836	64.4478998545395	79.4054943605273	48.1513167108084	51.9456676199262	41.0653361073042	61.5380586166136	62.5220967468252	73.4432035582584
augustus_masked-tulip_contig_212_pilon_pilon-processed-gene-1.125-mRNA-1	0	0	0	19.0186159952543	20.822180822824	17.7676618857539	69.7901242142093	43.4517890028863	41.1926804667747	0	0.36411242855672	0.941567126804672	6.53380698730733	4.49529815941669	10.5723765045905	37.3485701666869	66.8505495985284	45.1656064663087
maker-tulip_contig_334_pilon_pilon-augustus-gene-4.58-mRNA-1	0	0	0	0	1.05619757796933	0.303720715995793	0.373209220396841	1.82741168703727	1.08401790702039	73.9227249275871	80.1047342824784	35.936478673045	4.33219811114943	2.99686543961113	10.9062410257881	48.3789768998534	26.4516563159645	25.9211306676206
maker-tulip_contig_18_pilon_pilon-augustus-gene-0.19-mRNA-1	39.4874865948559	47.9083068455215	35.1167289477189	38.8166834657239	40.1355079628347	44.6469452513815	48.7038032617878	35.5330050257247	31.9785282571014	16.9920605432764	10.5592604281449	11.2988055216561	26.8454243608932	36.9613404218706	31.8284176875041	15.6747885155525	6.25220967468252	14.9242873540846
maker-tulip_contig_62_pilon_pilon-augustus-gene-0.7-mRNA-1	0	0	0	15.1213586191776	14.6358807232894	16.097197947777	11.1962766119052	15.6345222113189	13.5502238377548	13.7969722359937	17.6594527850009	14.437362611005	13.7778103862785	3.99582058614817	12.130410936846	20.8997180207367	25.0088386987301	44.5764898602264
maker-tulip_contig_702_pilon_pilon-augustus-gene-0.44-mRNA-1	0.183662728348167	0	0	90.4163711249794	92.3418453881761	102.353881290582	138.833829987625	112.690387367298	124.662059307344	23.9631623046206	26.3981510703622	24.6376731513889	2.69874636432259	1.99791029307409	3.00478069077836	14.7072089775554	12.504419349365	11.7823321216457
augustus_masked-tulip_contig_181_pilon_pilon-processed-gene-1.58-mRNA-1	10.2851127874974	23.7545354775711	11.3397770560342	8.57396622736874	13.8814538818827	8.95976112187588	13.8087411546831	15.6345222113189	14.6342417447752	12.780353229131	10.9233728567016	10.5141662493188	18.3230674209271	14.9843271980556	20.6996003142509	12.5785339939619	15.8709937895787	15.9061483642217
maker-tulip_contig_619_pilon_pilon-augustus-gene-1.33-mRNA-1	0	0.798471780758692	0	0	0	0	0	0	0	0	0	0	0	0	0.111288173732532	242.475432222065	376.094458892441	263.727867322837
augustus_masked-tulip_contig_52_pilon_pilon-processed-gene-2.14-mRNA-1	0.550988185044501	0	0.182899629936036	24.6306666168047	30.6297297611107	23.0159558581612	2.05265071218263	0.556345335831347	3.25205372106116	0.580925146778681	0.72822485711344	1.25542283573956	1.70447138799322	0	0.925917605454664	1.54812726079531	2.88563523446885	0
maker-tulip_contig_745_pilon_pilon-augustus-gene-1.30-mRNA-1	8.63214823236385	3.59312301341411	9.69368038660991	4.05314767111977	3.31947810218934	5.77069360392006	2.79906915297631	2.63959465905384	4.06506715132645	5.95448275448148	4.18729292840228	9.10181555911183	7.59910160480309	9.4900738921019	7.3450194663471	2.51570679879238	4.32845285170328	4.12381624257601
maker-tulip_contig_317_pilon_pilon-augustus-gene-0.13-mRNA-1	36.5488829412852	55.6934067079188	30.178438939446	102.731704433382	77.8568500331681	104.631786660551	144.991782124173	62.5380888452755	104.607728027467	27.739175758682	25.8519824275271	20.2436932263004	93.8879656219597	75.9205911368152	93.8159304565243	97.725533337704	83.6834217995968	73.8359479623133
augustus_masked-tulip_contig_138_pilon_pilon-processed-gene-0.10-mRNA-1	0.918313641740835	0.798471780758692	1.64609666942433	8.41807593232567	9.50577820172401	5.77069360392006	8.77041667932577	9.13705843518636	11.6531925004691	7.26156433473351	8.01047342824784	7.21868130550249	6.88890519313925	7.49216359902782	10.3498001571255	2.12867498359355	2.40469602872404	3.53469963649372
maker-tulip_contig_759_pilon_pilon-augustus-gene-1.61-mRNA-1	0.734650913392668	1.99617945189673	0.365799259872072	42.8698311368437	52.8098788984667	38.4206705734678	4.85171986515894	3.4517776310704	5.42008953510193	5.66402018109214	4.36934914268064	3.4524127982838	1.3493731821613	2.49738786634261	3.44993338570848	5.22492950518417	4.80939205744809	5.30204945474058
maker-tulip_contig_272_pilon_pilon-augustus-gene-2.12-mRNA-1	52.1602148508794	54.8949349271601	60.3568778788919	51.2879070691694	40.1355079628347	50.5694992132995	28.5505053603584	23.3502604454763	32.5205372106116	49.6691000495772	59.7144382833021	54.1401097912686	34.8706438126946	35.9623852753335	42.6233705395597	48.5724928074529	33.6657444021366	41.6309068298149
maker-tulip_contig_81_pilon_pilon-augustus-gene-1.13-mRNA-1	0.183662728348167	0	0.365799259872072	26.5543528576362	30.7006458842029	27.0751832274449	97.2210019133771	52.7918931810768	35.1032098740876	0	0.18205621427836	0	0	0.499477573268521	0.222576347465064	0	0.480939205744809	0
augustus_masked-tulip_contig_316_pilon_pilon-processed-gene-3.12-mRNA-1	0	0	0	0	0	0	2.98567376317473	8.3248754631698	2.16803581404077	6.24494532787082	3.27701185701048	4.08012421615358	0.426117846998304	0	1.89189895345304	1.3546113531959	0	0.785488808109716
augustus_masked-tulip_contig_407_pilon_pilon-processed-gene-7.6-mRNA-1	5.22336799422187	8.4258734664561	7.44584393469603	4.02508741801202	4.79815471134641	3.39863481199292	7.3130346736761	8.42436787724183	11.82934541036	2.56187989729398	5.59822858905957	3.2311445234847	25.7765787613391	26.1826143907359	24.1194858930516	2.09771243837765	3.72727884452227	1.58668739238163
maker-tulip_contig_628_pilon_pilon-augustus-gene-0.23-mRNA-1	92.9333405441725	101.006680265975	104.618588323413	48.0142108732649	42.7005592236174	47.5322920533416	24.4452039359931	20.9137115294266	36.8566088386931	39.0672161208663	42.0549854983012	45.3521499410917	25.4960511787319	20.4785805040094	32.8300112510969	25.3505838955232	32.2229267849022	39.8635570115681
augustus_masked-tulip_contig_360_pilon_pilon-processed-gene-0.7-mRNA-1	0	0	0	20.1098480605558	27.612022395484	22.019751909695	22.9523670544057	23.5533061884804	17.3442865123262	1.88800672703071	1.09233728567016	1.56927854467445	2.13058923499152	0	1.78061077972051	7.93415221157596	4.32845285170328	8.8367490912343
maker-tulip_contig_405_pilon_pilon-augustus-gene-0.30-mRNA-1	7.34650913392668	12.7755484921391	4.75539037833694	1.40301265538761	1.50885368281334	1.67046393797686	2.23925532238105	1.62436594403313	0.542008953510193	1.74277544033604	0.54616864283508	1.7262063991419	1.20733389982853	0.998955146537043	1.78061077972051	0	0.480939205744809	1.17823321216457
maker-tulip_contig_691_pilon_pilon-augustus-gene-2.84-mRNA-1	208.273533946821	122.765036291649	141.381413940556	40.3755864161546	55.0731594226867	48.5953145593268	77.627517842543	83.6548461177063	79.9463206427534	28.0296383320713	30.9495564273212	31.2286430390216	43.8901382408254	49.9477573268521	44.6265576667452	13.9331453471578	18.2756898183027	13.1569375358377
augustus_masked-tulip_contig_270_pilon_pilon-processed-gene-2.24-mRNA-1	199.209778302839	169.569455900272	167.323897450683	138.118801408158	159.334948905088	161.804174239599	282.146170620012	435.137179545025	269.649454371321	119.085298151029	140.685760145746	129.62240779011	163.132115759184	164.078382818709	152.635068919379	638.896639257617	1046.28805148989	927.518930670094
maker-tulip_contig_424_pilon_pilon-augustus-gene-2.65-mRNA-1	123.788678906665	119.842629574072	127.481042065417	53.7821517898585	49.7303085318447	55.2771703112343	33.2156206153189	35.3299592827206	36.8024079433421	71.8517267793211	67.3607992829932	68.5774724022736	55.4734417150626	58.438876072417	48.0720395255044	43.5410792098681	54.3461302491634	50.5049666394344
maker-tulip_contig_809_pilon_pilon-augustus-gene-2.8-mRNA-1	5.50988185044501	9.18242547872496	6.40148704776126	3792.34320751272	3561.4982329126	3388.46016800706	5592.54016764667	4637.56477021459	4767.51075507566	594.57688772798	527.052740335852	810.21851261542	762.2538086388	539.935256703272	907.888921309994	1936.51368734733	1556.80020899595	2769.63353739486
maker-tulip_contig_306_pilon_pilon-augustus-gene-0.82-mRNA-1	6.06087003548951	3.79274095860379	5.48698889808108	6.85917298189499	9.05312209688001	9.87092326986326	4.29190603456367	2.23350317304556	5.14908505834683	9.00433977506955	6.3719674997426	6.27711417869781	4.04811954648389	7.99164117229634	3.78379790690608	7.93415221157596	9.13784490915137	7.85488808109716
maker-tulip_contig_58_pilon_pilon-augustus-gene-1.34-mRNA-1	370.815048534949	421.3934822954	455.785877800602	34.9194260896472	31.3841566025174	42.520900239411	40.1199911926604	28.8324955065881	40.3796670365094	50.9761816298292	50.4295713551057	53.0416148099965	35.4388009420257	25.9728338099631	41.2879124547693	38.7031815198828	22.1232034642612	28.8667136980321
augustus_masked-tulip_contig_254_pilon_pilon-processed-gene-0.38-mRNA-1	187.886971100175	243.733511076591	246.914500413649	285.435130223858	271.5936629064	299.468625971852	250.609991496479	295.431556071026	241.464988788791	145.23128669467	155.658063207998	131.348614189252	90.4790228459733	78.9174565764264	87.3612163800374	110.110551424066	142.838944106208	161.221577864519
augustus_masked-tulip_contig_248_pilon_pilon-processed-gene-0.8-mRNA-1	13.7747046261125	9.18242547872496	11.5226766859703	63.2914597874856	62.4665424684721	66.0592557290849	63.2589628572646	61.9289516162631	60.4339983163865	44.4407737285691	40.7805919983527	42.5274485606777	49.1455916871378	46.4514143139725	51.4151362644297	69.2786949205901	72.6218200674662	111.53941075158
augustus_masked-tulip_contig_402_pilon_pilon-processed-gene-1.2-mRNA-1	0.918313641740835	0.199617945189673	1.64609666942433	4.52081855624897	6.33718546781601	4.55581073993689	2.98567376317473	2.63959465905384	1.89703133728568	7.11633304803884	4.00523671412392	6.12018632423037	3.69302134065197	1.49843271980556	4.00637425437114	7.16008858117831	4.32845285170328	7.06939927298744
augustus_masked-tulip_contig_698_pilon_pilon-processed-gene-2.6-mRNA-1	42.0587647917303	48.3075427359009	38.4089222865676	62.6678986073133	65.6351352023801	62.4146071371354	73.8954256385746	75.3299706545365	72.0871908168557	87.8649284502755	65.9043495687663	89.7627327553787	114.128563354379	99.8955146537043	103.498001571255	103.143978750488	83.202482593852	109.772060933333
maker-tulip_contig_181_pilon_pilon-augustus-gene-1.35-mRNA-1	2.75494092522251	2.39541534227608	2.56059481910451	9.35341770258408	9.80754893828668	9.71906291186537	13.9953457648815	8.12182972016566	11.9241969772242	8.2781833415962	7.82841721396948	7.21868130550249	6.74686591080649	5.49425330595373	7.23373129261456	9.28876356477186	11.0616017321306	10.8004711115086
augustus_masked-tulip_contig_604_pilon_pilon-processed-gene-3.26-mRNA-1	17.9989473781204	17.7659971218809	20.118959292964	42.5580505467576	43.4549860650241	43.2802020294005	20.5265071218263	19.6954370714017	20.5963402333873	30.4985702058807	25.1237575704137	30.6009316211518	33.8763688363652	29.9686543961113	28.8236369967257	26.7051952487191	24.5278994929853	37.1143461831841
maker-tulip_contig_121_pilon_pilon-augustus-gene-1.2-mRNA-1	307.63506998318	291.641817922112	308.368776072157	56.7440673956768	49.3395154279961	58.9218189031838	65.4982181796456	66.5990037053584	70.7321684330802	101.661900686269	101.769423781603	100.276899004698	89.2716889461448	97.3981267873616	101.049661749139	67.1500199369966	77.9121513306591	54.5914721636252
maker-tulip_contig_35_pilon_pilon-augustus-gene-0.33-mRNA-1	76.7416344129981	93.6208162939566	79.7168037076214	24.4716585158608	20.5204100862614	26.9005438157474	39.5601773620652	30.2538157076171	41.1926804667747	55.7688140907534	67.1787430687149	59.3187289886943	50.3394318551447	51.3063363261425	57.8108676088383	67.7305676597948	59.6364615123563	55.376960971735
maker-tulip_contig_550_pilon_pilon-augustus-gene-0.15-mRNA-1	10.9040561820307	12.8633803880225	9.51260975297324	25.5519782605093	25.4407819459156	27.4199062401002	55.1528585902452	31.5573693777037	50.9488416299581	18.9555875393884	19.8787180370541	17.7767873540722	43.3731152531341	29.2893648964661	43.0585072988539	17.3893394568833	34.0553051587899	22.4473064137554
maker-tulip_contig_190_pilon_pilon-augustus-gene-3.1-mRNA-1	0.367325456696334	0.598853835569019	4.5724907484009	0	0	0	0	0	0	0	0	0	6.10768914030903	8.99059631883338	13.5771571953689	0.387031815198828	0	0
maker-tulip_contig_623_pilon_pilon-augustus-gene-1.18-mRNA-1	13.4073791694162	15.7698176699842	18.4728626235396	2.80602531077522	3.168592733908	2.27790536996845	2.42585993257947	3.85786911707869	4.60707610483664	8.71387720168021	6.18991128546424	5.80633061529548	11.5051818689542	14.9843271980556	10.2385119833929	7.74063630397655	8.17596649766175	6.48028266690515
maker-tulip_contig_290_pilon_pilon-augustus-gene-5.26-mRNA-1	139.583673544607	200.815652860811	126.383644285801	90.2604808299364	105.317987060371	99.3166741306242	193.508980775762	193.908684568955	201.627330705792	61.4328342718455	60.2606069261372	59.7895125520967	174.566277986972	157.335435579584	188.299589955444	33.0912201994998	38.4751364595847	40.6490458196778
maker-tulip_contig_845_pilon_pilon-augustus-gene-0.55-mRNA-1	27.7330719805732	16.5682894507429	12.8029740955225	6.23561180172272	4.52656104844001	5.31511252992637	2.42585993257947	2.63959465905384	2.43904029079587	2.03323801372538	2.7308432141754	1.88313425360934	2.05956959382514	1.49843271980556	1.66932260598798	0.774063630397655	1.44281761723443	1.374605414192
augustus_masked-tulip_contig_181_pilon_pilon-processed-gene-0.8-mRNA-1	13.0400537127199	21.359120135295	13.9003718751387	11.379991538144	10.7128611479747	9.26348183787168	8.39720745892893	10.3553328932112	9.48515668642838	29.7724137724074	34.2265682843317	27.4623745318029	27.9817386195553	20.9780580772779	30.1590950815161	19.158074852342	17.3138114068131	12.371448727728
maker-tulip_contig_704_pilon_pilon-augustus-gene-2.59-mRNA-1	599.291482600069	307.012399701717	429.448331089813	116.605940692215	145.151724286643	150.645475133913	260.686640447194	303.553385791191	259.622288731382	61.8685281319295	60.2606069261372	61.8295746601735	120.165232853522	100.894469800241	119.300922241274	18.1904953143449	22.604142670006	23.368292041264
maker-tulip_contig_860_pilon_pilon-augustus-gene-3.18-mRNA-1	0	0.399235890379346	0.548698889808108	3.4295864909475	3.31947810218934	1.82232429597476	0.933023050992103	0.812182972016566	0.271004476755096	2.32370058711472	2.18467457134032	2.35391781701168	1.3493731821613	0.998955146537043	1.00159356359279	3.48328633678945	1.44281761723443	2.35646642432915
augustus_masked-tulip_contig_211_pilon_pilon-processed-gene-1.2-mRNA-1	3.30592911026701	2.39541534227608	5.12118963820901	44.7405146773605	48.8868593231521	40.6985759434362	19.5934840708342	12.7918818092609	18.4283044193466	172.534768593268	145.644971422688	182.507094745639	70.8776018840513	51.4461900466577	45.2942867091404	199.127868919797	107.249442881092	117.62694901443
maker-tulip_contig_58_pilon_pilon-augustus-gene-5.10-mRNA-1	96.6065951111359	71.2636064327133	73.8914504941586	26.6572404523646	24.5943150298574	25.6644005016445	27.4308776991678	34.1116848246958	27.9134611057749	30.4985702058807	35.8650742128369	29.0316530764774	65.835207361238	46.950891887241	58.3150030358466	81.4701970993532	61.5602183353355	48.8966783048298
maker-tulip_contig_236_pilon_pilon-augustus-gene-4.36-mRNA-1	1.83662728348167	1.99617945189673	1.09739777961622	1.55890295043068	2.715936629064	1.67046393797686	0.559813830595262	0.406091486008283	1.08401790702039	7.98772076820686	5.4616864283508	2.51084567147913	0.690310912137253	2.99686543961113	1.00159356359279	1.93515907599414	1.44281761723443	3.14195523243886
augustus_masked-tulip_contig_60_pilon_pilon-processed-gene-1.4-mRNA-1	388.263007728025	313.999027783356	335.255021672754	65.4739239180886	78.0077354014494	76.233899714944	24.4452039359931	22.1319859874514	20.5963402333873	106.890227007277	102.13353621016	113.458838779963	6.32074806380818	5.99373087922226	7.12244311888203	28.059806601915	16.8328722010683	14.9242873540846
maker-tulip_contig_741_pilon_pilon-augustus-gene-0.8-mRNA-1	4.59156820870418	10.5797510950527	5.12118963820901	10.9123206530148	12.0708294625067	9.71906291186537	6.53116135694472	7.71573823415737	6.23310296536722	11.4732716488789	11.2874852852583	8.47410414124205	7.03094447547202	5.99373087922226	9.34820659353267	14.9007248851549	9.61878411489618	11.7823321216457
augustus_masked-tulip_contig_450_pilon_pilon-processed-gene-1.4-mRNA-1	0.429770784334711	1.82450801903361	0	0	0.150885368281334	0	0.746418440793682	0	17.3307362884884	2.3759838503248	9.11191352463192	7.21083491277911	8.96907048290264	10.9285693031152	13.933279351313	57.5767879880536	39.0907386429381	82.3113722018171
maker-tulip_contig_620_pilon_pilon-augustus-gene-3.19-mRNA-1	0	0	0	0	0	0	0	0	0	0	0	0	0	0	0	11.6109544559648	15.8709937895787	8.64037688920687
maker-tulip_contig_81_pilon_pilon-augustus-gene-3.6-mRNA-1	62.8126530950731	71.2636064327133	59.2594800992757	100.705130597822	100.338769907087	101.594579500593	67.9240781122251	54.2132133821057	58.8079714558559	104.711757706857	125.254675423512	101.846177549372	75.991016048031	68.4284275377874	73.0050419685408	94.6292788161133	87.0499962398104	101.720800650208
augustus_masked-tulip_contig_378_pilon_pilon-processed-gene-3.30-mRNA-1	0.367325456696334	0.399235890379346	1.09739777961622	0.77945147521534	0.452656104844001	1.36674322198107	0.373209220396841	0.406091486008283	0.542008953510193	2.32370058711472	3.09495564273212	3.76626850721869	0.710196411663841	1.49843271980556	1.33545808479038	1.54812726079531	0.961878411489618	1.17823321216457
maker-tulip_contig_916_pilon_pilon-augustus-gene-2.12-mRNA-1	0	0	0	18.5509451101251	20.822180822824	20.9567294037097	10.63646278131	36.9543252267537	6.23310296536722	0.29046257338934	0.72822485711344	0.156927854467445	0	0	0	0	0	0
maker-tulip_contig_372_pilon_pilon-augustus-gene-1.18-mRNA-1	25.7127819687434	30.7411635592096	23.2282530018766	18.5509451101251	27.612022395484	19.5899861817286	28.3639007501599	56.4467165551513	15.7182596517956	21.4942304308112	21.4826332848465	19.3021260994958	58.4491646799341	43.9540264476299	74.0066355321336	75.277688056172	63.9649143640596	66.7665486893258
maker-tulip_contig_407_pilon_pilon-augustus-gene-5.30-mRNA-1	14.5093555395052	9.78127931429398	10.4252789063541	17.4597130448236	17.5027027206347	19.5899861817286	21.6461347830168	22.7411232164638	23.8483939544485	8.71387720168021	6.73607992829932	4.70783563402336	42.6117846998304	38.4597731416761	36.836385505468	16.6423680535496	15.3900545838339	14.7279151520572
maker-tulip_contig_584_pilon_pilon-augustus-gene-2.2-mRNA-1	47.2013211854789	24.7526252035195	39.1405208063117	27.592582222623	29.2717614465787	27.1830040816234	50.7564539739704	46.0913836619401	47.4257834321419	14.6683599561617	9.83103557103144	14.9081461744073	35.2967616596929	30.9676095426483	35.5009274206776	5.80547722798241	9.61878411489618	7.85488808109716
augustus_masked-tulip_contig_675_pilon_pilon-processed-gene-0.27-mRNA-1	6.24453276383768	8.38395369796627	4.5724907484009	16.9920421596944	24.2925442932947	11.8451079238359	23.6987854951994	17.6649796413603	16.2602686053058	8.13295205490153	14.2003847137121	12.0834447939933	49.6427291753025	54.4430554862688	51.7490007856273	19.3515907599414	20.6803858470268	16.495264970304
maker-tulip_contig_59_pilon_pilon-augustus-gene-1.87-mRNA-1	33.6102792877146	33.7354327370547	32.1903348687424	65.1621433280024	42.8514445918987	49.6583370653121	31.7227837337315	20.3045743004141	31.4365193035912	62.3042219920135	77.1918348540247	77.9931436703203	36.6461348418542	34.463952555528	41.3992006285018	67.1500199369966	57.7127046893771	65.9810598812161
maker-tulip_contig_121_pilon_pilon-augustus-gene-4.58-mRNA-1	50.5072502957459	36.9293198600895	42.4327141451604	67.3446074586054	44.0585275381494	46.92485062135	16.9810195280563	18.4771626133769	16.2602686053058	39.3576786942556	54.4348080692297	49.4322741572453	47.7962185049765	43.9540264476299	64.5471407648684	117.077124097645	180.833141360048	163.185299884793
maker-tulip_contig_868_pilon_pilon-augustus-gene-0.41-mRNA-1	0.183662728348167	0	0.182899629936036	1.55890295043068	1.357968314532	1.36674322198107	2.79906915297631	1.42132020102899	4.33607162808154	9.7304962085429	6.55402371402096	7.06175345103504	0.923255335162993	0.998955146537043	1.44674625852291	2.12867498359355	4.80939205744809	2.749210828384
maker-tulip_contig_603_pilon_pilon-augustus-gene-3.89-mRNA-1	81.362588658238	94.2196701295257	81.2074356916	74.8273416206726	89.1732526542681	91.5717958727315	143.125736022189	163.045731632326	137.399269714834	73.7774936408925	69.5454738543336	61.5157189512386	130.960218310812	134.858944782501	129.873298745865	52.82984277464	61.0792791295907	60.2862660224207
maker-tulip_contig_281_pilon_pilon-augustus-gene-1.20-mRNA-1	374.671965830261	339.949360658013	350.069891697573	103.511155908597	110.146318845373	100.835277710603	122.785833510561	140.507654158866	112.73786233012	669.080537802346	448.768568196158	488.830266666092	140.334810944775	116.877752144834	127.202382576284	116.496576374847	138.99143046025	132.943980772569
maker-tulip_contig_43_pilon_pilon-augustus-gene-2.8-mRNA-1	0.734650913392668	1.19770767113804	1.28029740955225	0.155890295043068	0	0.303720715995793	0.186604610198421	0.203045743004141	0	0.726156433473351	0.36411242855672	0.313855708934891	4.33219811114943	4.49529815941669	4.8966796442314	0	0	0
maker-tulip_contig_2_pilon_pilon-augustus-gene-5.62-mRNA-1	0	0	0	0	0.150885368281334	0.151860357997896	2.23925532238105	0	1.89703133728568	37.6149032539196	42.0549854983012	42.6843764151451	0.639176770497457	0	0.222576347465064	6.9665726735789	1.44281761723443	0.392744404054858
augustus_masked-tulip_contig_181_pilon_pilon-processed-gene-0.6-mRNA-1	0	0	0	0	0	0	0	0	0	0	0	0	0	0	0	5.22492950518417	9.13784490915137	4.71293284865829
maker-tulip_contig_211_pilon_pilon-augustus-gene-1.86-mRNA-1	29.0187110790104	16.3686715055532	20.6676581827721	48.9495526435234	46.0200373258067	38.116949857472	48.7038032617878	43.6548347458904	37.6696222689584	46.3287804555998	32.5880623558265	42.0566649972753	50.4949648692991	39.4587282882132	37.0589618529331	64.2472813230054	54.3461302491634	114.681365984018
augustus_masked-tulip_contig_468_pilon_pilon-processed-gene-3.120-mRNA-1	65.0166058352511	56.0926425982981	44.4446100744568	124.712236034454	123.273345885849	112.224804560445	143.312340632387	121.015262830468	108.672795178794	37.7601345406143	38.0497487841773	39.5458193257962	131.173277234311	85.4106650289171	114.070378075845	249.442004895644	141.877065694719	266.280705949194
augustus_masked-tulip_contig_199_pilon_pilon-processed-gene-3.18-mRNA-1	53.4458539493166	32.1384891755374	77.9152423527514	56.4322868055906	61.4103448905027	64.0850710751123	93.8621189298056	65.989866476346	75.0682400611617	179.360639067918	130.716361851863	161.949545810404	89.9818853578086	83.4127547358431	80.9065023035506	66.3759563065989	71.6599416559765	95.0441457812756
maker-tulip_contig_263_pilon_pilon-augustus-gene-0.5-mRNA-1	8.99947368906018	6.58739219125921	12.0713755757784	16.9920421596944	22.180149137356	18.982544749737	24.4452039359931	28.4264040205798	19.783326803122	14.3778973827723	21.6646894991249	12.2403726484607	29.3311118017166	25.9728338099631	31.9397058612366	83.0183243601485	56.7508262778875	63.624593456887
maker-tulip_contig_272_pilon_pilon-augustus-gene-5.57-mRNA-1	29.3860365357067	25.5510969842781	26.8862456005973	55.4969450353322	63.0700839415974	58.4662378291901	44.7851064476209	72.6903759954826	44.986743141346	5.51878889439747	5.27963021407244	6.74789774210015	22.7262851732429	23.4754459436205	21.8124820515762	12.1915021787631	9.13784490915137	9.62223789934402
maker-tulip_contig_691_pilon_pilon-augustus-gene-0.13-mRNA-1	74.5670677093558	74.2578756105584	75.903346423455	13.2506750786608	13.2779124087574	9.71906291186537	12.6891134934926	9.54314992119465	10.2981701166937	12.780353229131	17.6594527850009	15.5358575922771	34.6575848891954	40.9571610080187	42.2895060183621	14.513693069956	8.65690570340656	10.8004711115086
maker-tulip_contig_2_pilon_pilon-augustus-gene-2.43-mRNA-1	913.354748075435	1715.31700301486	615.640154364698	23.3835442564602	8.60046599203601	9.56720255386747	21.6461347830168	29.6446784786046	24.3904029079587	9.7304962085429	5.64374264262916	7.84639272337227	1666.4758799692	1745.17464100021	2348.84819479882	57.8612563722247	62.0411575410804	54.3950999615978
maker-tulip_contig_133_pilon_pilon-augustus-gene-1.24-mRNA-1	0	0	0	0.155890295043068	0	0	0.186604610198421	0	0	0.29046257338934	0.9102810713918	0.784639272337227	0	0	0.111288173732532	4.2573499671871	9.13784490915137	4.71293284865829
maker-tulip_contig_677_pilon_pilon-augustus-gene-0.11-mRNA-1	17.0806337363795	19.1633227382086	13.7174722452027	14.9654683241345	20.9730661911054	15.9453375897791	12.6891134934926	10.9644701222236	12.1952014539793	55.6235828040587	67.72491171155	71.5591016371551	30.9645635485435	35.9623852753335	38.0605554165259	30.5755134007074	35.5895012251159	37.1143461831841
maker-tulip_contig_320_pilon_pilon-augustus-gene-1.2-mRNA-1	2.57127819687434	4.19197684898313	1.64609666942433	20.8892995357711	9.20400746516134	18.3751033177455	25.1916223767868	25.9898551045301	23.3063850009383	1.01661900686269	0.36411242855672	0.470783563402336	15.90839962127	12.9864169049816	15.3577679750894	11.9979862711637	3.84751364595847	7.26577147501487
maker-tulip_contig_424_pilon_pilon-augustus-gene-2.60-mRNA-1	459.707809055462	296.233030661475	405.671379198128	382.08711315056	415.538304246793	403.341110842413	519.8804440128	500.304710762204	488.350067112684	1895.99444779892	1753.38339971489	1843.58843428355	415.109802617515	393.588327735595	370.367042181866	314.076318033849	326.07678149498	323.621388941203
augustus_masked-tulip_contig_659_pilon_pilon-processed-gene-1.24-mRNA-1	1.83662728348167	2.1957973970864	0.548698889808108	7.3268438670242	11.1655172528187	6.37813503591165	8.58381206912735	2.84264040205798	7.3171208723876	7.98772076820686	4.73346157123736	5.02169134295825	5.25545344631242	4.49529815941669	4.22895060183621	3.87031815198828	4.80939205744809	3.92744404054858
augustus_masked-tulip_contig_287_pilon_pilon-processed-gene-1.152-mRNA-1	58.7720730714135	68.4689552000578	60.722677138764	50.0407847088248	41.3425909090854	47.8360127693374	49.0770124821846	29.6446784786046	42.8187073273052	46.0383178822104	50.9757399979408	44.5675106687545	78.1926249241889	87.9080528952597	80.7952141298181	53.2168745898388	65.407731981294	56.751566385927
maker-tulip_contig_837_pilon_pilon-augustus-gene-2.11-mRNA-1	54.9151557761019	64.4765962962644	64.1977701075487	101.328691777994	89.6259087591121	89.7494715767567	84.1586791994877	55.6345335831347	84.0113877940799	97.4501933721237	122.341775995058	104.827806784253	102.197263638427	85.9101426021857	104.722171482312	143.201771623566	182.275958977283	190.481035966606
augustus_masked-tulip_contig_555_pilon_pilon-processed-gene-2.136-mRNA-1	124.706992548405	165.08404067186	152.904090626526	51.1320167741263	43.7567568015867	58.0106567551964	56.9144061105183	63.3502718172921	65.3120788979782	55.1878889439747	52.2501334978893	53.9831819368012	83.6611372940004	83.9122323091116	102.273831660197	68.1175994749937	58.6745831008667	57.5370551940367
maker-tulip_contig_451_pilon_pilon-augustus-gene-1.43-mRNA-1	5.32621912209684	2.99426917784509	2.19479555923243	9.97697888275635	9.80754893828668	9.11162147987378	25.751436207382	29.0355412495922	26.0164297684893	38.6315222607823	40.0523671412392	33.7394887105007	46.7309238874807	43.4545488743614	42.4007941920946	42.7670155794704	26.9325955217093	28.2775970919498
maker-tulip_contig_2_pilon_pilon-augustus-gene-3.6-mRNA-1	171.724651005536	111.786049306217	128.761339474969	41.310928186413	49.3395154279961	44.0395038193899	99.833466456155	103.147237446104	92.9545355269981	19.8966862771698	19.1159024992278	20.7144767897028	43.6770793173262	45.951936740704	43.5136759294199	20.7062021131373	16.8328722010683	11.5859599196183
maker-tulip_contig_381_pilon_pilon-augustus-gene-0.71-mRNA-1	48.3032975555679	30.54154561402	35.665427837527	41.310928186413	44.6620690112747	44.4950848933836	51.5028724147641	79.1878397716151	71.8161863401006	15.1040538162457	15.4747782136606	20.4006210807679	22.8683244555757	20.4785805040094	25.4849917847498	18.9645589447425	14.4281761723443	18.0662425865235
maker-tulip_contig_323_pilon_pilon-augustus-gene-2.21-mRNA-1	0.734650913392668	0.598853835569019	0.548698889808108	13.5624556687469	27.3102516589214	16.097197947777	3.91869681416683	2.63959465905384	5.14908505834683	1.59754415364137	2.54878699989704	1.41235069020701	7.88318016946863	9.4900738921019	16.3593615386822	4.83789768998534	3.36657444021366	2.35646642432915
maker-tulip_contig_667_pilon_pilon-augustus-gene-0.152-mRNA-1	0.550988185044501	0.199617945189673	0	0.77945147521534	0.150885368281334	0.911162147987378	5.22492908555578	4.67005208909525	3.79406267457135	266.789873658109	192.06930606367	268.974342557201	14.5590264391087	14.9843271980556	8.34661302993988	23.2219089119297	12.0234801436202	14.1387985459749
augustus_masked-tulip_contig_318_pilon_pilon-processed-gene-0.69-mRNA-1	39.4874865948559	30.9407815043993	33.1048330184225	11.535881833187	14.3341099867267	16.5527790217707	12.1292996628973	18.2741168703727	9.48515668642838	21.2037678574218	14.2003847137121	19.7729096628981	11.0080443807895	12.9864169049816	11.1288173732532	21.0932339283361	17.3138114068131	30.2413191122241
maker-tulip_contig_336_pilon_pilon-augustus-gene-0.64-mRNA-1	3.67325456696334	3.79274095860379	1.64609666942433	3.4295864909475	2.86682199734534	3.03720715995793	5.22492908555578	5.07614357510353	3.25205372106116	2.75939444719873	1.27439349994852	1.56927854467445	3.62200169948559	1.99791029307409	3.44993338570848	6.77305676597948	1.44281761723443	4.90930505068572
maker-tulip_contig_872_pilon_pilon-augustus-gene-0.39-mRNA-1	1.101976370089	1.39732561632771	1.46319703948829	4.67670885129204	5.28098788984667	4.85953145593268	1.30623227138894	3.85786911707869	6.23310296536722	15.5397476763297	10.1951479995882	14.7512183199399	6.88890519313925	6.9926860257593	5.56440868662659	7.74063630397655	7.69502729191694	6.0875382628503
augustus_masked-tulip_contig_711_pilon_pilon-processed-gene-2.24-mRNA-1	49.4052739256569	76.2540550624551	39.6892196961198	5.45616032650738	6.03541473125334	3.49278823395162	4.47851064476209	3.65482337407455	5.14908505834683	7.69725819481752	9.46692314247472	8.3171762867746	107.736795649405	100.894469800241	121.971838410855	7.35360448877772	4.32845285170328	5.49842165676801
maker-tulip_contig_190_pilon_pilon-augustus-gene-3.34-mRNA-1	6.42819549218585	4.39159479417281	6.40148704776126	5.76794091659352	9.20400746516134	6.83371610990534	8.02399823853209	6.70050951913667	8.13013430265289	13.5065096626043	12.5618787852068	12.5542283573956	22.9393440967421	27.4712665297687	15.914208843752	2.90273861399121	4.80939205744809	2.55283862635658
maker-tulip_contig_2_pilon_pilon-augustus-gene-4.1-mRNA-1	0	0	0	0	0	0	0	0	0	0	0	0	0.0710196411663841	0	0	5.22492950518417	7.69502729191694	5.89116606082287
augustus_masked-tulip_contig_145_pilon_pilon-processed-gene-4.2-mRNA-1	0	0	0	21.8246413060295	24.7452003981387	22.1716122676929	64.3785905184551	60.30458567223	49.3228147694276	47.6358620358518	25.4878699989704	30.4440037666844	7.52808196363671	5.49425330595373	4.5628151230338	46.4438178238593	62.5220967468252	50.6640281230767
maker-tulip_contig_693_pilon_pilon-augustus-gene-1.21-mRNA-1	0.367325456696334	0.199617945189673	0.182899629936036	6.23561180172272	4.37567568015867	6.22627467791375	6.3445567467463	3.85786911707869	7.04611639563251	3.48555088067208	3.27701185701048	2.51084567147913	1.3493731821613	0.998955146537043	1.00159356359279	2.12867498359355	0.480939205744809	0.785488808109716
augustus_masked-tulip_contig_636_pilon_pilon-processed-gene-0.11-mRNA-1	0.734650913392668	2.1957973970864	2.0118959292964	0	0	0	0	0	0	0	0	0	4.19015882881666	3.99582058614817	6.56600225021937	0	0	0
maker-tulip_contig_881_pilon_pilon-augustus-gene-1.41-mRNA-1	0	1.99617945189673	0	0.311780590086136	0.754426841406668	0	1.67944149178579	0	1.89703133728568	0.29046257338934	0.72822485711344	0.156927854467445	2.05956959382514	1.99791029307409	5.89827320782418	14.7072089775554	10.099723320641	9.81861010137145
maker-tulip_contig_881_pilon_pilon-augustus-gene-1.33-mRNA-1	0	0	0	13.5624556687469	8.14780988719201	7.28929718389903	24.6318085461915	6.70050951913667	14.3632372680201	0	0	0	0	0	0	0	0	0
maker-tulip_contig_697_pilon_pilon-augustus-gene-1.20-mRNA-1	29.2023738073586	28.3457482169336	25.7888478209811	12.3153333084024	9.65666357000535	11.5413872078401	14.7417642056752	19.6954370714017	15.7182596517956	8.42341462829087	7.82841721396948	5.64940276082803	21.8740494792463	21.4775356505464	22.5914992677039	2.32219089119297	4.32845285170328	3.14195523243886
maker-tulip_contig_290_pilon_pilon-augustus-gene-5.5-mRNA-1	2.203952740178	1.99617945189673	0.914498149680181	12.0035527183162	7.54426841406668	12.9081304298212	15.3015780362705	25.3807178755177	13.2792193609997	4.50216988753478	2.91289942845376	3.4524127982838	6.88890519313925	2.99686543961113	4.78539147049887	7.35360448877772	8.65690570340656	7.65851587906973
maker-tulip_contig_58_pilon_pilon-augustus-gene-4.28-mRNA-1	128.196584387021	93.421198348767	117.970261308743	123.309223379067	131.873811877886	123.158750336294	48.3305940413909	45.0761549469194	60.1629938396314	236.581766025618	220.470075491094	272.426755355485	165.97290140584	189.30200026877	172.274092937959	129.075110368809	119.753862230457	115.859599196183
maker-tulip_contig_58_pilon_pilon-augustus-gene-5.17-mRNA-1	13.5910418977644	7.3858639720179	12.6200744655865	10.4446497678856	11.3164026211	9.41534219586957	16.7944149178579	16.2436594403313	27.1004476755096	14.087434809383	15.4747782136606	11.4557333761235	11.7182407924534	11.9874617584445	12.352987284311	14.3201771623566	18.7566290240475	16.495264970304
augustus_masked-tulip_contig_194_pilon_pilon-processed-gene-1.39-mRNA-1	1.28563909843717	0.998089725948365	0.365799259872072	0.77945147521534	0.754426841406668	0.911162147987378	0	0.609137229012424	0	0.580925146778681	0.72822485711344	0	0.426117846998304	0	0.111288173732532	6.19250904318124	12.0234801436202	4.32018844460344
maker-tulip_contig_376_pilon_pilon-augustus-gene-0.35-mRNA-1	2343.72007645096	2417.17369830175	2128.58589319559	1269.10289194562	1370.34091473107	1341.07882147942	2159.76175843652	2380.50829098055	1901.36740891376	1023.73533991073	879.149458750201	870.635736585387	628.381785040166	800.163072376171	688.317354535709	471.017719096973	478.534509716085	482.093755977338
maker-tulip_contig_860_pilon_pilon-augustus-gene-1.13-mRNA-1	816.748152964299	726.21008460003	761.594059053654	518.958792198373	571.252004313129	513.743591106883	505.69849363772	439.594033603966	514.366496881173	691.155693379935	732.048037613286	808.963089779681	804.226416568133	768.196507686986	727.602079863293	682.337090195533	631.473177142934	788.2380189381
augustus_masked-tulip_contig_176_pilon_pilon-processed-gene-0.52-mRNA-1	8.56602965015851	9.24430704173376	12.2670781798099	8.62696892768338	6.19987978268	13.8542204601481	3.64438803717515	4.46700634609111	2.71004476755096	1.50023919155594	1.07595222638511	3.09775584718737	1.70305099516989	0	0	4.23993353550316	1.46205518546422	1.374605414192
maker-tulip_contig_80_pilon_pilon-augustus-gene-0.70-mRNA-1	160.888550032994	137.337146290495	136.808923192155	51.7555779542986	61.4103448905027	51.7843820772827	67.9240781122251	87.1066237487767	81.3013430265289	34.1293523732475	36.411242855672	33.8964165649682	71.8718768603807	69.926860257593	65.7713106759263	14.9007248851549	15.8709937895787	14.1387985459749
maker-tulip_contig_287_pilon_pilon-augustus-gene-1.120-mRNA-1	834.563437614071	1034.2205740277	1058.62305806978	324.563594279668	340.095620106126	348.215800889176	259.567012786003	284.467085948802	264.229364836219	156.995020916938	166.217323636143	153.946225232564	188.841225861415	141.352153234992	158.808223916323	578.612563722247	306.358274059443	467.365840825281
maker-tulip_contig_526_pilon_pilon-augustus-gene-0.14-mRNA-1	6.06087003548951	11.9770767113804	7.13308556750541	25.7218986821062	10.2602050431307	12.9081304298212	64.1919859082567	46.9035666339567	49.5938192461826	2.03323801372538	2.00261835706196	2.19698996254423	62.6393235087507	46.950891887241	62.6552418114154	74.1165926105755	36.5513796366055	42.2200234358972
augustus_masked-tulip_contig_819_pilon_pilon-processed-gene-2.38-mRNA-1	56.017132146191	40.5224428735036	45.9078071139451	91.3517128952379	80.7236720305134	81.0934311708767	55.9813830595262	45.4822464329277	56.6399356418151	118.508729942851	110.690178281243	117.538962996117	78.1216052830225	71.9247705506671	73.3389064897384	59.9899313558183	58.1936438951219	55.7697053757898
maker-tulip_contig_132_pilon_pilon-augustus-gene-0.0-mRNA-1	0	0	0	0	0	0	0.559813830595262	0.406091486008283	0	0.14523128669467	0.18205621427836	0	10.5109068926248	4.99477573268521	8.90305389860254	16.4488521459502	38.9560756653295	40.0599292135955
maker-tulip_contig_196_pilon_pilon-augustus-gene-5.40-mRNA-1	0	0	0	0.935341770258408	2.11239515593867	1.97418465397265	1.67944149178579	3.65482337407455	0.813013430265289	1.59754415364137	0.54616864283508	0.627711417869781	6.74686591080649	4.99477573268521	4.22895060183621	11.0304067331666	8.65690570340656	17.0843815763863
maker-tulip_contig_182_pilon_pilon-augustus-gene-1.63-mRNA-1	0	0	0	24.1629957316755	27.612022395484	17.9195222437518	12.5025088832942	8.12182972016566	13.0082148842446	0.726156433473351	0.54616864283508	0.313855708934891	0.213058923499152	0	0.556440868662659	1.16109544559648	0.961878411489618	1.374605414192
maker-tulip_contig_490_pilon_pilon-augustus-gene-2.39-mRNA-1	20.937551031691	19.3629406833983	13.3516729853306	139.989484948675	135.193289980075	136.370601482111	22.3925532238105	23.5533061884804	27.6424566290198	26.2868628917353	46.9705032838169	35.4656951096426	63.2785002792482	48.9488021803151	52.528018001755	59.2158677254206	83.6834217995968	68.7302707096001
maker-tulip_contig_837_pilon_pilon-augustus-gene-0.0-mRNA-1	0	0	0	0	0	0	0	0	0	0	0	0	0	0	0	10.2563431027689	24.5278994929853	19.4408480007155
augustus_masked-tulip_contig_598_pilon_pilon-processed-gene-0.20-mRNA-1	12.6727282560235	16.7679073959325	16.6438663241793	12.3153333084024	15.5411929329774	15.4897565157854	18.4738564096436	19.6954370714017	19.2413178496118	9.7304962085429	5.64374264262916	5.64940276082803	3.83506062298474	2.99686543961113	3.11606886451089	13.1590817167601	11.5425409378754	10.4077267074537
maker-tulip_contig_362_pilon_pilon-augustus-gene-6.3-mRNA-1	34.8959183861517	24.7526252035195	31.0929370891261	219.181754830554	260.729916390144	240.698667426666	49.263617092383	49.1370698070022	46.8837744786317	32.5318082196061	24.5775889275786	32.9548494381635	19.3883620384229	17.4817150643982	16.1367851912171	40.8318565034763	29.3372915504333	31.4195523243886
maker-tulip_contig_807_pilon_pilon-augustus-gene-3.40-mRNA-1	911.701783520301	725.810848709651	910.108558561716	251.451045904469	256.80689681483	286.864216258026	354.735363987198	305.583843221233	361.519971991299	267.661261378277	307.310889701872	307.264739047258	301.4783767513	259.228860526363	248.729068292208	176.680023638265	164.962147570469	190.873780370661
maker-tulip_contig_626_pilon_pilon-augustus-gene-0.25-mRNA-1	4.3987223439386	2.16585470530795	2.65936061926997	0	0.286682199734534	0.504176388553016	0.849050976402814	0.57461945270172	0.298104924430606	0	0.322239499272697	0.51786191974257	213.632052003365	155.921914047234	215.667577639748	0.667629881217978	2.04399162441544	2.09332767361239
augustus_masked-tulip_contig_506_pilon_pilon-processed-gene-1.7-mRNA-1	0.183662728348167	0	0	13.5624556687469	11.1655172528187	8.2004593318864	18.4738564096436	9.94924140720293	18.6993088961017	1.4523128669467	2.54878699989704	1.25542283573956	15.340242491939	9.98955146537043	7.0111549451495	42.573499671871	12.504419349365	18.0662425865235
augustus_masked-tulip_contig_339_pilon_pilon-processed-gene-3.6-mRNA-1	0	0.598853835569019	0	0	1.20708294625067	0.303720715995793	3.91869681416683	3.04568614506212	7.3171208723876	10.1661900686269	6.3719674997426	12.8680840663305	3.76404098181836	3.49634301287965	4.78539147049887	2.90273861399121	5.77127046893771	8.05126028312459
maker-tulip_contig_907_pilon_pilon-augustus-gene-2.14-mRNA-1	0.367325456696334	0.798471780758692	0.914498149680181	9.97697888275635	8.14780988719201	8.3523196898843	4.85171986515894	8.3248754631698	5.69109401185703	4.35693860084011	5.82579885690752	5.33554705189314	18.7491852679254	22.975968370352	13.3545808479038	15.4812726079531	16.8328722010683	20.4227090108526
augustus_masked-tulip_contig_190_pilon_pilon-processed-gene-1.14-mRNA-1	72.1794522408296	63.478506570316	65.4780675171009	16.5243712745652	23.6890028201694	21.1085897617076	17.72743796885	27.0050838195508	18.1572999425915	32.5318082196061	36.5932990699504	42.3705207062102	34.941663453861	30.9676095426483	35.2783510732126	20.7062021131373	28.3754131389437	33.1869021426355
maker-tulip_contig_271_pilon_pilon-augustus-gene-1.61-mRNA-1	36.3652202129371	49.9044862974182	29.6297400496378	70.3065230644237	71.5196645653521	69.2483232470407	47.5841756005973	53.8071218960975	49.5938192461826	47.0549368890731	60.9888317832506	51.0015527019197	68.8890519313925	63.4336518051022	76.1211108330517	68.8916631053913	60.5983399238459	78.3525086089441
maker-tulip_contig_895_pilon_pilon-augustus-gene-3.0-mRNA-1	0	0	0	0	0	0	0	0.203045743004141	0	0	0	0	0	0	0	10.4498590103683	25.0088386987301	14.7279151520572
augustus_masked-tulip_contig_190_pilon_pilon-processed-gene-2.31-mRNA-1	64.4656176502066	59.8853835569019	61.2713760285721	12.4712236034454	14.032339250164	12.4525493558275	17.1676241382547	20.10152855741	21.6803581404077	12.4898906557416	14.2003847137121	12.3973005029282	31.6037403190409	23.974923516889	40.2863188911765	7.35360448877772	7.21408808617213	9.81861010137145
augustus_masked-tulip_contig_474_pilon_pilon-processed-gene-0.139-mRNA-1	1.28563909843717	0.598853835569019	0.548698889808108	7.01506327693806	6.94072694094134	7.89673861589061	2.23925532238105	2.63959465905384	1.35502238377548	2.46893187380939	2.91289942845376	3.76626850721869	0.497137488164689	0	0.333864521197595	5.41844541278359	10.5806625263858	6.48028266690515
maker-tulip_contig_479_pilon_pilon-augustus-gene-0.8-mRNA-1	0	0	0	36.1665484499918	37.7213420703334	33.2574184015393	8.39720745892893	6.09137229012424	8.67214325616309	0.14523128669467	0	0.313855708934891	0.497137488164689	1.49843271980556	0.890305389860254	2.12867498359355	3.84751364595847	2.16009422230172
augustus_masked-tulip_contig_345_pilon_pilon-processed-gene-1.3-mRNA-1	7.71383459062302	5.1900665749315	4.93829000827298	3.27369619590443	2.715936629064	2.42976572796634	2.23925532238105	4.67005208909525	1.35502238377548	1.4523128669467	1.09233728567016	2.19698996254423	0.994274976329377	0	1.22416991105785	1.16109544559648	0.961878411489618	0.589116606082287
augustus_masked-tulip_contig_855_pilon_pilon-processed-gene-1.1-mRNA-1	0	0	0	39.5961349409393	46.1709226940881	39.1799723634573	6.15795213654788	3.85786911707869	6.23310296536722	0.726156433473351	0.54616864283508	0.627711417869781	0.426117846998304	0	0.445152694930127	2.12867498359355	0.961878411489618	0.589116606082287
maker-tulip_contig_704_pilon_pilon-augustus-gene-2.11-mRNA-1	0.550988185044501	0.598853835569019	0.548698889808108	8.88574681745488	7.39338304578534	6.68185575190744	5.03832447535736	3.24873188806626	2.16803581404077	8.42341462829087	6.3719674997426	9.41567126804672	6.53380698730733	5.99373087922226	5.67569686035912	6.57954085838007	4.80939205744809	5.69479385879544
augustus_masked-tulip_contig_514_pilon_pilon-processed-gene-1.56-mRNA-1	28.2289613471133	31.2541816783471	25.108461197619	1.22997442788981	1.3806011197742	0.797266879488956	1.81379681112865	3.3928943655992	1.91058156112343	1.48716837575342	0.460602222124251	1.06710941037863	2.28470185632258	0	1.34213537521433	0.477984291770552	3.7801821571542	0.439873732541441
maker-tulip_contig_498_pilon_pilon-augustus-gene-0.36-mRNA-1	2.93860365357067	2.1957973970864	1.46319703948829	1.87068354051682	2.56505126078267	2.27790536996845	2.61246454277789	3.04568614506212	2.71004476755096	6.39017661456549	4.91551778551572	3.92319636168613	7.67012124596948	2.99686543961113	8.01274850874229	5.41844541278359	6.25220967468252	6.28391046487773
maker-tulip_contig_407_pilon_pilon-augustus-gene-0.90-mRNA-1	81.362588658238	63.478506570316	80.1100379119838	37.2577805152933	42.8514445918987	40.6985759434362	58.5938476023041	77.9695653135903	60.1629938396314	35.4364339534995	38.9600298555691	37.0349736543171	41.7595490058338	40.4576834347502	39.6185898487813	58.0547722798241	46.6511029572465	55.5733331737624
maker-tulip_contig_477_pilon_pilon-augustus-gene-1.24-mRNA-1	0	0	0	0.77945147521534	1.05619757796933	1.51860357997896	2.98567376317473	3.04568614506212	3.52305819781625	8.85910848837488	4.18729292840228	3.60934065275124	0.994274976329377	0	0.779017216127722	2.90273861399121	2.88563523446885	2.94558303041143
maker-tulip_contig_710_pilon_pilon-augustus-gene-0.22-mRNA-1	0	0	0	0	0	0.759301789989482	29.6701330215489	35.1269135397165	56.097926688305	0	0	0	0	0	0	0	0	0
maker-tulip_contig_407_pilon_pilon-augustus-gene-9.153-mRNA-1	5.32621912209684	12.7755484921391	10.242379276418	18.395054815082	18.10624419376	19.7418465397265	12.6891134934926	15.0253849823065	12.7372104074895	19.0252985570018	24.0314202847435	13.9665790476026	20.6667155794178	19.4796253574723	25.5962799584823	50.8946836986458	56.7508262778875	59.3044050122835
maker-tulip_contig_456_pilon_pilon-augustus-gene-1.7-mRNA-1	19.835574661602	30.54154561402	27.0691452305333	14.3419071439623	15.0885368281334	11.5413872078401	5.97134752634946	8.93401269218222	8.13013430265289	15.5397476763297	17.4773965707226	17.1051361369515	19.1042834737573	16.4827599178612	17.9173959709376	9.67579537997069	5.77127046893771	9.22949349528916
maker-tulip_contig_507_pilon_pilon-augustus-gene-1.28-mRNA-1	65.0166058352511	110.388723689889	68.4044615960775	79.0363795868355	80.4219012939508	76.0820393569461	72.0293795365904	66.8020494483625	71.0031729098353	73.6322623541978	85.5664207108292	72.5006687639598	92.6096120809648	95.4002164942876	95.3739648887797	80.3091016537567	106.768503675348	105.648244690757
maker-tulip_contig_247_pilon_pilon-augustus-gene-1.0-mRNA-1	23.8761546852617	19.562558628588	18.8386618834117	9.35341770258408	7.54426841406668	7.74487825789271	6.53116135694472	7.91878397716151	6.77511191887741	19.3157611303911	23.3031954276301	20.2436932263004	20.8797745029169	21.4775356505464	25.9301444796799	26.8987111563185	20.199446641282	18.8517313946332
maker-tulip_contig_872_pilon_pilon-augustus-gene-0.24-mRNA-1	672.572911210988	661.334252413387	717.149448979198	155.266733862896	174.876141838066	178.891501721522	298.194167097076	344.365580135024	279.947624488015	168.903986425901	142.914128208513	146.099832509192	275.769266649069	215.774311652001	240.159878914804	138.55738984118	142.838944106208	146.493662712462
maker-tulip_contig_323_pilon_pilon-augustus-gene-8.81-mRNA-1	54.9151557761019	54.6953169819704	67.6728630763334	68.2799492288638	70.6143523556641	74.2597150609713	85.6515160810751	99.6954598150334	105.149736980977	42.1170731414544	55.7092015691782	55.0816769180733	70.2384251135538	64.9320845249078	48.8555082685814	77.2128471321661	106.287564469603	117.430576812402
maker-tulip_contig_530_pilon_pilon-augustus-gene-0.59-mRNA-1	62.628990366725	49.9044862974182	63.8319708476766	32.2692910739151	33.7983224950187	30.0683508835835	15.6747872566673	19.0862998423893	13.5502238377548	25.996400318346	25.8519824275271	24.323817442454	22.5132262497437	24.9738786634261	19.8092949243907	13.7396294395584	15.3900545838339	17.869870384496
maker-tulip_contig_702_pilon_pilon-augustus-gene-0.59-mRNA-1	125.625306190146	143.924538481754	132.41933207369	45.831746742662	46.6235787989321	42.9764813134047	31.1629699031362	33.2995018526792	37.1276133154482	41.2456854212863	58.9862134261887	48.3337791759732	99.4985172741041	104.390812813121	118.633193198879	38.1226337970845	41.8417108997984	38.4889515973761
maker-tulip_contig_344_pilon_pilon-augustus-gene-0.0-mRNA-1	105.055080615152	75.2559653365067	60.9055767687	5.45616032650738	7.54426841406668	6.83371610990534	8.02399823853209	8.12182972016566	7.04611639563251	5.3735576077028	6.55402371402096	6.12018632423037	0.639176770497457	0.499477573268521	1.33545808479038	1.74164316839472	2.40469602872404	2.94558303041143
maker-tulip_contig_209_pilon_pilon-augustus-gene-0.12-mRNA-1	152.623727257327	176.462263547671	112.849071670534	80.7511728323092	83.2887232912961	83.9787779728367	125.21169344314	115.736073512361	123.307036923569	82.0556769824887	87.5690390678912	75.1684422899063	164.126390735514	154.838047713242	168.045142336123	80.5026175613561	80.7977865651279	77.9597642048893
maker-tulip_contig_33_pilon_pilon-augustus-gene-3.33-mRNA-1	515.541278473305	802.663757607675	682.764318551223	339.061391718673	414.482106668823	466.211299053542	765.63871564412	785.380933940019	518.702568509255	299.757375737799	260.522442632333	227.074605414393	144.240891208926	154.838047713242	178.728807014446	155.780305617528	164.481208364725	163.774416490876
maker-tulip_contig_76_pilon_pilon-augustus-gene-1.1-mRNA-1	298.451933565771	330.966553124478	287.884017519321	32.7369619590443	34.1000932315814	45.406247041371	78.9337501139319	87.9188067207932	75.6102490146719	601.257526915935	748.979265541173	657.370782364129	91.3312585399699	70.92581540413	65.4374461547287	161.392266937911	120.715740641947	125.678209297555
maker-tulip_contig_333_pilon_pilon-augustus-gene-1.35-mRNA-1	0.734650913392668	3.39350506822444	0.548698889808108	9.50930799762715	12.3726001990693	11.0858061338464	131.742854800085	126.903589377588	298.375928907361	85.9769217232448	101.04119892449	107.338652455733	61.0058717619239	63.4336518051022	89.4756916809555	111.658678684862	108.692260498327	127.445559115801
augustus_masked-tulip_contig_640_pilon_pilon-processed-gene-1.9-mRNA-1	0.183662728348167	0	0	7.48273416206726	6.48807083609734	6.68185575190744	9.14362589972261	6.90355526214081	7.04611639563251	1.74277544033604	1.8205621427836	1.09849498127212	7.95419981063502	6.9926860257593	8.01274850874229	4.83789768998534	8.17596649766175	9.42586569731659
augustus_masked-tulip_contig_372_pilon_pilon-processed-gene-2.43-mRNA-1	0.918313641740835	0	0	28.5279239928814	19.916868613136	20.3492879717181	19.966693291231	14.6192934962982	13.0082148842446	0.14523128669467	0	0	2.13058923499152	0.499477573268521	1.11288173732532	7.74063630397655	10.5806625263858	4.71293284865829
augustus_masked-tulip_contig_473_pilon_pilon-processed-gene-2.26-mRNA-1	2.75494092522251	6.78701013644888	9.32788112673784	8.2621856372826	5.13010252156534	4.2520900239411	1.67944149178579	2.03045743004141	1.08401790702039	2.32370058711472	2.18467457134032	2.19698996254423	1.3493731821613	0	2.00318712718557	6.57954085838007	6.73314888042733	4.32018844460344
maker-tulip_contig_598_pilon_pilon-augustus-gene-0.70-mRNA-1	5.32621912209684	3.79274095860379	6.40148704776126	3.27369619590443	1.357968314532	1.21488286398317	0.746418440793682	2.03045743004141	0.542008953510193	5.22832632100813	2.18467457134032	2.35391781701168	4.68729631698135	2.99686543961113	5.00796781796393	3.09625452159062	3.36657444021366	0.981861010137145
maker-tulip_contig_516_pilon_pilon-augustus-gene-0.0-mRNA-1	67.7715467604736	60.6838553376606	66.7583649266532	41.7785990715422	35.0054054412694	43.887643461392	32.4692021745252	22.3350317304556	34.1465640711422	27.4487131852927	24.9417013561353	23.2253224611819	26.4903261550613	28.4702216763057	28.8236369967257	29.8014497703097	33.6657444021366	44.7728620622538
maker-tulip_contig_351_pilon_pilon-augustus-gene-1.67-mRNA-1	3.30592911026701	0.998089725948365	1.64609666942433	1.87068354051682	3.77213420703334	1.51860357997896	1.30623227138894	1.82741168703727	3.52305819781625	2.9046257338934	4.18729292840228	2.51084567147913	3.83506062298474	3.99582058614817	3.22735703824342	2.70922270639179	1.92375682297924	3.92744404054858
augustus_masked-tulip_contig_323_pilon_pilon-processed-gene-6.44-mRNA-1	1.28563909843717	1.99617945189673	1.28029740955225	1.40301265538761	1.05619757796933	1.82232429597476	1.30623227138894	0.812182972016566	1.62602686053058	5.51878889439747	4.18729292840228	5.49247490636059	20.8797745029169	18.4806702109353	18.3625486658677	1.74164316839472	2.40469602872404	1.17823321216457
maker-tulip_contig_104_pilon_pilon-augustus-gene-0.40-mRNA-1	0.734650913392668	0.598853835569019	0.548698889808108	1.71479324547375	2.715936629064	2.58162608596424	1.67944149178579	1.21827445802485	3.25205372106116	3.48555088067208	2.54878699989704	3.4524127982838	1.91753031149237	2.49738786634261	2.1144753009181	2.90273861399121	3.36657444021366	2.94558303041143
maker-tulip_contig_2_pilon_pilon-augustus-gene-3.12-mRNA-1	143.073265383222	83.639919034473	102.240893134244	102.887594728425	107.430382216309	103.26504343857	113.268998390441	109.238609736228	110.840830992834	59.8352901182041	70.4557549257253	68.4205445478062	124.071313117673	102.892380093315	118.744481372611	172.616189578677	134.182038402802	157.490506025998
maker-tulip_contig_654_pilon_pilon-augustus-gene-1.125-mRNA-1	6.24453276383768	3.39350506822444	5.85278815795316	95.7166411564438	70.7652377239454	90.3569130087483	103.005744829528	76.142153626553	78.0492893054678	22.5108494376739	18.5697338563927	23.8530338790517	37.6404098181836	30.4681319693798	30.9381122976438	82.0507448221514	80.3168473593831	101.917172852236
maker-tulip_contig_773_pilon_pilon-augustus-gene-1.24-mRNA-1	7.34650913392668	5.98853835569019	7.31598519744144	22.6040927812449	19.1624417717294	21.2604501197055	22.2059486136121	16.2436594403313	16.5312730820609	36.8887468204462	41.8729292840228	31.5424987479565	28.9049939547183	25.9728338099631	24.8172627423546	21.4802657435349	24.0469602872404	33.1869021426355
maker-tulip_contig_2_pilon_pilon-augustus-gene-5.41-mRNA-1	0	0	0	0.155890295043068	0.150885368281334	0.455581073993689	1.86604610198421	1.21827445802485	0.542008953510193	8.71387720168021	6.3719674997426	11.4557333761235	28.5498957488864	38.4597731416761	2.89349251704583	30.7690293083068	12.9853585551098	22.5828032331543
augustus_masked-tulip_contig_394_pilon_pilon-processed-gene-2.29-mRNA-1	0	0	0	0	0	0	0	0	0	0	0	0	0	0	0	13.546113531959	19.7185074355372	11.7823321216457
maker-tulip_contig_211_pilon_pilon-augustus-gene-4.36-mRNA-1	1.6529645551335	0.798471780758692	1.09739777961622	9.97697888275635	8.75135136031735	8.5041800478822	8.95702128952419	7.51269249115323	8.94314773291818	9.00433977506955	9.64897935675308	10.0433826859165	14.4880067979423	22.4764907970835	10.2385119833929	9.09524765717245	10.5806625263858	12.371448727728
maker-tulip_contig_909_pilon_pilon-augustus-gene-0.42-mRNA-1	136.461407162688	196.024822176259	175.766544368531	731.749044932161	708.105033344298	732.118785907858	717.308121602729	659.898664763459	622.497283106457	122.429974683607	134.903654780265	127.425417827566	535.772172959201	370.612359365243	331.638757722945	779.869107625638	637.725386817617	746.017995502202
maker-tulip_contig_103_pilon_pilon-augustus-gene-0.16-mRNA-1	0	0.598853835569019	0	28.6838142879245	9.05312209688001	20.8048690457118	6.90437057734156	2.84264040205798	5.14908505834683	3.04985702058807	6.18991128546424	3.60934065275124	3.33792313482005	3.99582058614817	3.00478069077836	11.4174385483654	14.9091153780891	9.62223789934402
maker-tulip_contig_177_pilon_pilon-augustus-gene-1.27-mRNA-1	0	0	0	0	0	0	0.933023050992103	1.82741168703727	1.62602686053058	165.12797297184	202.810622706093	49.4322741572453	0.923255335162993	0	0.222576347465064	0.193515907599414	0	0
maker-tulip_contig_711_pilon_pilon-augustus-gene-1.20-mRNA-1	0.550988185044501	1.39732561632771	1.09739777961622	9.04163711249794	14.032339250164	9.71906291186537	8.95702128952419	8.93401269218222	8.13013430265289	4.64740117422945	3.09495564273212	3.76626850721869	4.11913918765028	3.99582058614817	6.34342590275431	5.611961320383	9.13784490915137	8.05126028312459
maker-tulip_contig_178_pilon_pilon-augustus-gene-0.79-mRNA-1	123.786842279381	123.563508072408	121.994053167336	43.8051729071021	57.3364399469067	56.1245511088625	78.7471455037335	106.192923591166	70.4611639563251	46.7644743156838	56.9835950691267	39.4563704487498	75.2808196363671	80.9153668695004	86.8047755113748	115.310323861263	121.59585938846	120.768904246869
maker-tulip_contig_420_pilon_pilon-augustus-gene-2.40-mRNA-1	4.40790548035601	1.39732561632771	3.65799259872072	19.9539577655127	18.7097856668854	13.5155718618128	8.21060284873051	7.30964674814909	11.3821880237141	11.0375777887949	12.1977663566501	7.53253701443738	14.7010657214415	9.98955146537043	12.130410936846	11.9979862711637	13.4662977608547	19.4408480007155
maker-tulip_contig_633_pilon_pilon-augustus-gene-0.78-mRNA-1	0	0	0	0	0.150885368281334	0	0	0	0	0	0	0	0.0710196411663841	0	0.111288173732532	103.143978750488	128.410767933864	74.8178089724504
maker-tulip_contig_229_pilon_pilon-augustus-gene-0.13-mRNA-1	10.6524382441937	8.38395369796627	9.32788112673784	6.23561180172272	9.50577820172401	6.83371610990534	7.46418440793683	7.71573823415737	13.0082148842446	8.13295205490153	9.64897935675308	9.10181555911183	12.1443586394517	9.4900738921019	9.7933592884628	10.4498590103683	12.0234801436202	10.2113545054263
maker-tulip_contig_279_pilon_pilon-augustus-gene-0.24-mRNA-1	54.5478303194056	90.0276932805425	33.4706322782946	108.343755054932	98.6790308559921	99.4685344886221	83.5988653688924	59.0863112142051	79.9463206427534	271.437274832339	385.048893198732	253.909268528327	124.781509529337	115.878796998297	145.453643068419	1516.9711996718	2320.5316677187	2017.13525922575
maker-tulip_contig_353_pilon_pilon-augustus-gene-0.22-mRNA-1	260.433748797701	259.902564636954	218.389474128825	146.822156580413	117.726799747828	140.0501779564	105.093850417649	87.6223599360072	118.7026708635	206.585696071701	228.116436490785	225.189901882239	129.398496401563	118.875662437908	132.544214915445	210.880089988309	213.537007350695	238.788597665354
augustus_masked-tulip_contig_361_pilon_pilon-processed-gene-0.52-mRNA-1	84.668517768505	132.546315605943	111.568774260982	85.4278816836013	121.462721466473	94.0015616006978	63.8187766878599	125.279223433555	72.0871908168557	121.122893103355	123.980281923563	125.385355719489	205.459821894349	329.655198357224	194.643015858198	151.329439742742	271.249712040072	204.423462310554
maker-tulip_contig_334_pilon_pilon-augustus-gene-0.25-mRNA-1	0	0	0	0	0	0	0	0	0	0.29046257338934	0	0	0.0710196411663841	0	0	12.9655658091607	7.69502729191694	8.05126028312459
augustus_masked-tulip_contig_926_pilon_pilon-processed-gene-0.36-mRNA-1	0	0.199617945189673	0.182899629936036	0	0	0	0	0	0	0	0	0	0	0	0.111288173732532	280.59806601915	537.209092816952	460.885558158376
maker-tulip_contig_323_pilon_pilon-augustus-gene-2.10-mRNA-1	0.918313641740835	3.79274095860379	1.28029740955225	4.05314767111977	4.97921715328401	3.94836930794531	3.91869681416683	3.65482337407455	8.13013430265289	2.03323801372538	1.63850592850524	2.98162923488146	7.81216052830225	7.49216359902782	7.23373129261456	1.16109544559648	1.44281761723443	2.35646642432915
maker-tulip_contig_52_pilon_pilon-augustus-gene-0.5-mRNA-1	248.862996911766	217.184324366364	213.62676776529	100.705130597822	92.7945014930201	94.9127237486852	85.6515160810751	75.1269249115323	72.9002042471209	150.023919155594	174.773965707226	166.029670026557	77.482428512525	67.4294723912504	92.1466078505363	81.4701970993532	83.6834217995968	135.889563802981
augustus_masked-tulip_contig_126_pilon_pilon-processed-gene-0.47-mRNA-1	23.7861599483711	16.875701086335	17.6114053665409	369.919875622448	411.381412350642	359.963718183894	110.07992560215	97.124900708601	100.420708861601	15.6501234542177	20.3557053184634	18.9035293491485	50.4914138872408	38.0551963073286	64.3078711913435	61.8515543869246	61.2716548118887	59.27887662602
augustus_masked-tulip_contig_619_pilon_pilon-processed-gene-1.44-mRNA-1	12.6727282560235	23.5549175323814	10.242379276418	8.57396622736874	7.84603915062934	8.80790076387799	9.14362589972261	3.85786911707869	5.96209848861212	4.35693860084011	2.18467457134032	2.66777352594657	99.2854583506049	97.8976043606302	99.7142036643485	5.611961320383	6.25220967468252	7.4621436770423
maker-tulip_contig_185_pilon_pilon-augustus-gene-0.20-mRNA-1	8.44848550401568	22.1575919160537	13.5345726152667	325.18715545984	351.412022727226	306.909783513749	59.5268706532962	49.5431612930105	70.7321684330802	22.9465432977579	29.311050498816	23.3822503156494	27.6976600548898	19.9791029307409	29.1575015179233	58.8288359102218	53.3842518376738	59.1080328102561
maker-tulip_contig_327_pilon_pilon-augustus-gene-9.2-mRNA-1	116.210754735019	133.18509303055	153.707020001945	41.1955693680812	44.6288742302528	51.3667660927884	53.8466263188563	40.446712006425	52.7428912660769	97.5997815974192	116.506874327437	98.1364030697616	26.1998558226907	23.9649339654237	25.3236239328376	25.8343736645217	31.3235704701594	23.1208630667095
augustus_masked-tulip_contig_623_pilon_pilon-processed-gene-4.26-mRNA-1	2.02029001182984	1.99617945189673	2.37769518916847	1.71479324547375	2.26328052422	2.58162608596424	0.746418440793682	0.812182972016566	0	1.4523128669467	1.63850592850524	2.35391781701168	3.47996241715282	2.49738786634261	3.11606886451089	1.16109544559648	2.88563523446885	1.76734981824686
maker-tulip_contig_316_pilon_pilon-augustus-gene-1.55-mRNA-1	65.7512567486438	83.041065198904	71.1479560451181	35.2312066797334	44.5111836429934	37.8132291414762	53.7421277371451	84.8731205757311	57.4529490720804	32.2413456462168	39.5061984984041	33.111777292631	45.3815507053194	44.9529815941669	49.189372789779	42.7670155794704	48.5748597802257	42.2200234358972
maker-tulip_contig_843_pilon_pilon-augustus-gene-9.53-mRNA-1	12.3054027993272	17.1671432863119	10.9739777961622	2.65013501573216	2.715936629064	3.64464859194951	0.933023050992103	1.01522871502071	0.542008953510193	4.64740117422945	4.00523671412392	3.76626850721869	10.5819265337912	6.49320845249078	13.7997335428339	2.70922270639179	2.88563523446885	2.35646642432915
augustus_masked-tulip_contig_806_pilon_pilon-processed-gene-1.4-mRNA-1	0	0.598853835569019	0	0.935341770258408	4.37567568015867	5.61883324592216	1.49283688158736	3.85786911707869	9.21415220967328	10.3114213553216	20.0261835706196	4.08012421615358	96.9418101921142	98.3970819338987	61.319783726625	0.193515907599414	0	0
augustus_masked-tulip_contig_2_pilon_pilon-processed-gene-5.4-mRNA-1	0	0	0	5.01031408268421	4.53259646317126	7.90129442663055	355.530299626643	114.958408316655	225.581416406175	4.22187350421406	13.3046681394626	14.3541908481372	0	0	0	0	0	0
maker-tulip_contig_281_pilon_pilon-augustus-gene-3.17-mRNA-1	35.8142320278926	49.5052504070389	30.9100374591901	63.4473500825287	64.2771668878481	55.732751385228	34.5218528867078	31.6751359086461	28.7264745360402	63.1756097121815	65.1761247116529	61.672646805706	86.5729425818222	77.4190238566208	83.7999948205964	78.567458485362	77.9121513306591	87.5820021042333
augustus_masked-tulip_contig_843_pilon_pilon-processed-gene-0.20-mRNA-1	218.925972191015	256.30944162354	267.765058226357	68.1240589338207	62.4665424684721	65.907395371087	60.2732890940899	51.9797102090602	65.8540878514884	83.217527276046	73.7327667827358	73.285308036297	155.675053436714	152.840137420168	155.024426009417	43.9281110250669	46.1701637515017	54.5914721636252
maker-tulip_contig_862_pilon_pilon-augustus-gene-1.45-mRNA-1	72.4824957426041	64.580397627763	64.6477031971913	23.3133936236908	36.3739357315811	27.8937105570536	56.9069419261103	77.6913926456746	52.8269026538709	42.834515697726	47.9608890894912	40.8310584538846	57.7020380548637	58.6186879987937	62.8399801798114	31.9668927763472	47.0839482424168	31.8122967284435
maker-tulip_contig_837_pilon_pilon-augustus-gene-6.38-mRNA-1	25.1617937836989	15.3705817796048	27.2520448604694	40.0638058260685	28.517334605172	28.0941662296108	27.9906915297631	20.10152855741	23.8483939544485	43.7146172950957	50.7936837836625	48.4907070304406	37.9244883828491	24.9738786634261	38.6169962851885	40.8318565034763	37.5132580480951	48.7003061028024
maker-tulip_contig_623_pilon_pilon-augustus-gene-4.86-mRNA-1	620.780021816805	614.623653239003	588.388109504228	53.0027003146431	37.8722274386147	37.5095084254804	53.1823139065499	53.197984667085	56.6399356418151	199.402556631782	213.369883134238	159.12484442999	85.7207068878256	65.4315620981763	95.0401003675821	66.1824403989995	71.1790024502317	60.4826382244481
maker-tulip_contig_209_pilon_pilon-augustus-gene-2.17-mRNA-1	45.7320193586936	20.161412464157	23.4111526318126	5.14437973642124	8.75135136031735	9.26348183787168	11.0096720017068	16.2436594403313	12.7372104074895	7.40679562142818	6.00785507118588	6.9048255965676	4.68729631698135	3.49634301287965	6.89986677141697	7.54712039637714	9.13784490915137	4.12381624257601
augustus_masked-tulip_contig_446_pilon_pilon-processed-gene-0.21-mRNA-1	0	0	0	0.311780590086136	0.452656104844001	1.06302250598527	8.95702128952419	12.1827445802485	14.9052462215303	24.0459441380365	17.2862375457303	10.8280219582537	17.5134435116303	7.99164117229634	9.90464746219533	12.9655658091607	8.17596649766175	7.65851587906973
augustus_masked-tulip_contig_131_pilon_pilon-processed-gene-0.24-mRNA-1	5.32621912209684	9.18242547872496	3.84089222865676	15.5890295043068	17.653588088916	13.0599907878191	7.46418440793683	8.12182972016566	6.23310296536722	12.4898906557416	9.83103557103144	12.8680840663305	4.68729631698135	8.99059631883338	6.12084955528925	7.74063630397655	8.65690570340656	9.42586569731659
maker-tulip_contig_161_pilon_pilon-augustus-gene-0.35-mRNA-1	3.85691729531151	4.99044862974182	4.02379185859279	0.311780590086136	0.452656104844001	0.151860357997896	0.933023050992103	1.82741168703727	1.62602686053058	21.9299242908952	19.2979587135062	17.4189918458864	7.88318016946863	7.49216359902782	9.57078294099773	2.12867498359355	2.40469602872404	2.16009422230172
maker-tulip_contig_620_pilon_pilon-augustus-gene-0.59-mRNA-1	0.367325456696334	0.598853835569019	0.914498149680181	231.964759024085	274.007828798902	232.498208094779	43.8520833966288	40.20305711482	38.7536401759788	9.7304962085429	9.102810713918	10.8280219582537	6.81788555197287	7.99164117229634	8.12403668247482	38.8966974274822	32.703865990647	28.6703414960046
maker-tulip_contig_54_pilon_pilon-augustus-gene-1.0-mRNA-1	110.564962465597	96.8147034169914	96.5710046062271	37.4136708103363	32.8930102853307	34.1685805495267	31.1741661797481	30.2538157076171	33.3416807751795	27.0202808895434	35.6830179985586	29.3455087854123	54.4010451334502	55.9414882060744	65.2148698072636	28.059806601915	27.4135347274541	37.5070905872389
maker-tulip_contig_669_pilon_pilon-augustus-gene-2.47-mRNA-1	1.83662728348167	2.99426917784509	1.46319703948829	22.915873371331	18.8606710351667	24.6013779956592	22.3925532238105	15.4314764683147	21.4093536636526	14.6683599561617	13.4721598565986	18.0467032637562	15.4112621331053	19.9791029307409	13.3545808479038	11.4174385483654	20.6803858470268	27.8848526878949
maker-tulip_contig_1_pilon_pilon-augustus-gene-3.1-mRNA-1	0.183662728348167	0.199617945189673	0	0	0	0	0	0	0	0	0	0	0.0710196411663841	0	0.222576347465064	6.57954085838007	8.17596649766175	6.28391046487773
maker-tulip_contig_799_pilon_pilon-augustus-gene-0.80-mRNA-1	0	0.399235890379346	0	0.467670885129204	0.452656104844001	0.151860357997896	0	0	0	0	0.18205621427836	0.156927854467445	4.68729631698135	2.99686543961113	3.56122155944102	1.54812726079531	4.32845285170328	0.981861010137145
maker-tulip_contig_284_pilon_pilon-augustus-gene-1.24-mRNA-1	1.02851127874974	2.6269721586961	3.48423795028149	2.29314624008353	3.58805405773011	3.37737436187321	2.53782269869852	2.6375642016238	2.90516799081463	3.80505971140036	3.71394677127855	1.77799259111616	1.98144798854212	1.49843271980556	2.69317380432727	6.92206401483103	7.26699139880406	7.28933613925816
maker-tulip_contig_474_pilon_pilon-augustus-gene-1.55-mRNA-1	0	0	0	0	0	0.151860357997896	0	0	0.271004476755096	0.871387720168021	0.18205621427836	1.56927854467445	24.2887172789034	20.9780580772779	38.7282844589211	0	0	1.374605414192
maker-tulip_contig_707_pilon_pilon-augustus-gene-0.5-mRNA-1	48.3032975555679	78.6494704047312	46.6394056336892	523.323720459579	362.879310716607	476.082222323405	896.075338172816	763.655039438576	733.338114099291	320.380218448442	255.606924846818	232.253224611819	386.062769380464	361.621763046409	351.893205342265	488.240634873321	438.616555639266	499.374509755752
augustus_masked-tulip_contig_516_pilon_pilon-processed-gene-1.3-mRNA-1	7.34650913392668	8.98280753353528	7.31598519744144	4.3649282612059	4.52656104844001	7.74487825789271	5.97134752634946	9.13705843518636	7.04611639563251	3.9212447407561	3.27701185701048	3.60934065275124	4.19015882881666	5.49425330595373	4.11766242810368	8.12766811917538	7.21408808617213	6.67665486893258
maker-tulip_contig_645_pilon_pilon-augustus-gene-2.9-mRNA-1	0.183662728348167	0.998089725948365	0.548698889808108	67.6563880486915	69.1054986728508	53.9104270892532	10.63646278131	6.09137229012424	12.1952014539793	0.435693860084011	0.9102810713918	2.19698996254423	2.91180528782175	0.998955146537043	2.55962799584823	7.35360448877772	2.88563523446885	8.24763248515201
augustus_masked-tulip_contig_654_pilon_pilon-processed-gene-1.28-mRNA-1	0	0	0	0	0	0.151860357997896	0.373209220396841	0	0	0	0.18205621427836	0.156927854467445	0.284078564665536	0	0.222576347465064	318.914215723834	473.725117658637	376.445511286581
augustus_masked-tulip_contig_570_pilon_pilon-processed-gene-0.54-mRNA-1	9.46597701906453	4.92257852837734	10.5185577176214	1.3110373813122	3.30589841904402	2.00911253631217	0.871443529626624	5.42132133821057	2.04608379950098	0.592543649714254	0.961256811389741	0.764238651256459	0.505659845104655	0	0	0	0	0
maker-tulip_contig_199_pilon_pilon-augustus-gene-6.14-mRNA-1	0	0	0	0	0	0	0	0	0	0	0	0	0.0710196411663841	0	0	6.9665726735789	10.5806625263858	6.87302707096001
maker-tulip_contig_236_pilon_pilon-augustus-gene-3.8-mRNA-1	23.6924919569135	25.9503328746575	31.2758367190622	258.466109181407	223.159459688092	261.503536472378	287.930913536163	192.487364367926	244.988046986607	144.795592834586	128.713743494801	146.413688218127	499.055018476181	336.647884382983	262.528801835042	1250.49979490741	517.490585381414	657.061387983777
maker-tulip_contig_278_pilon_pilon-augustus-gene-0.24-mRNA-1	0	0	0	6.23561180172272	52.5081081619041	25.8162608596424	7.2775797977384	15.2284307253106	19.2413178496118	5.3735576077028	8.01047342824784	0.627711417869781	0.142039282332768	0	0.333864521197595	0.774063630397655	0	0.589116606082287
maker-tulip_contig_507_pilon_pilon-augustus-gene-2.36-mRNA-1	13.0400537127199	8.98280753353528	14.4490707649469	263.922269507914	243.22721366951	242.824712438636	207.690931150842	214.010213126365	192.955187449629	27.303481898598	21.3005770705681	29.6593644943472	224.777164291606	122.871483024056	154.356696967022	394.772451502804	251.05026539879	332.654510234465
augustus_masked-tulip_contig_323_pilon_pilon-processed-gene-2.45-mRNA-1	9.18313641740835	5.1900665749315	7.13308556750541	34.7635357946042	30.327959024548	36.1427652034993	25.5648315971836	23.1472147024721	30.894510350081	108.633002447613	124.890562994955	135.899521968808	39.202841923844	38.9592507149447	41.1766242810368	52.4428109594411	50.0176773974601	54.9842165676801
augustus_masked-tulip_contig_781_pilon_pilon-processed-gene-4.5-mRNA-1	15.9786573662905	13.3744023277081	12.2542752057144	7.48273416206726	7.24249767750401	5.61883324592216	7.83739362833367	15.4314764683147	10.5691745934488	26.867788038514	27.8546007845891	23.8530338790517	23.5075012260731	33.9644749822594	13.9110217165665	14.3201771623566	9.61878411489618	16.6916371723315
maker-tulip_contig_662_pilon_pilon-augustus-gene-1.4-mRNA-1	482.298324642287	517.210095986443	496.572495276338	165.404279749546	168.388071001968	158.516397488944	108.790487745679	106.686324746666	127.320613224312	211.892447287524	237.58335963326	230.840873921612	173.910766699006	160.092551784026	181.612283595856	92.113572017321	95.706901943217	108.593827721168
maker-tulip_contig_831_pilon_pilon-augustus-gene-4.44-mRNA-1	0	0	0	2.18246413060295	3.01770736562667	1.82232429597476	1.67944149178579	2.23350317304556	2.71004476755096	0.871387720168021	0.18205621427836	0.784639272337227	3.69302134065197	3.49634301287965	1.66932260598798	4.2573499671871	6.25220967468252	7.4621436770423
maker-tulip_contig_673_pilon_pilon-augustus-gene-0.92-mRNA-1	58.221084886369	67.6704834192991	60.3568778788919	126.894700165057	138.663653450546	137.281763630098	111.02974306806	126.700543634584	82.1143564567942	34.2745836599422	17.8415089992793	16.6343525735492	75.5648982010326	67.4294723912504	57.981138514649	201.063027995791	111.577895732796	202.066995886224
maker-tulip_contig_1_pilon_pilon-augustus-gene-3.24-mRNA-1	178.33650922607	130.350518208856	153.269889886398	61.2648859519257	69.8599255142574	70.7669268270197	103.93876788052	114.517799054336	106.504759364753	19.6062237037805	18.9338462849494	18.9882703905609	22.8683244555757	14.9843271980556	23.7043810050293	18.7710430371431	19.7185074355372	17.869870384496
maker-tulip_contig_224_pilon_pilon-augustus-gene-2.22-mRNA-1	0	0	0.914498149680181	14.8095780290915	23.085461347044	23.386495131676	32.6558067847236	16.8527966693437	11.3821880237141	0	0	0	0.0710196411663841	0	0	0	0	0
maker-tulip_contig_468_pilon_pilon-augustus-gene-3.33-mRNA-1	0.183662728348167	0	0	1.52304818257077	3.69216496184423	2.16401010147002	1.33982110122466	6.86700702840006	2.86993740883647	2.0898782155363	1.81145933206968	2.14834232765933	5.67873050766407	7.85178745178115	5.15486820729087	4.08125049127164	2.32774575580488	3.93137148458913
maker-tulip_contig_934_pilon_pilon-augustus-gene-0.14-mRNA-1	0	0	0	6.23561180172272	4.52656104844001	4.85953145593268	4.66511525496052	9.54314992119465	7.3171208723876	1.30708158025203	0.36411242855672	0.784639272337227	6.60482662847372	4.49529815941669	3.44993338570848	7.35360448877772	7.21408808617213	15.3170317581395
maker-tulip_contig_389_pilon_pilon-augustus-gene-0.0-mRNA-1	65.2939365550569	24.2495879816415	16.9017548023891	0.311780590086136	0	0	0	0	0	0	0	0	0.0710196411663841	0	0.278220434331329	0	0	0
maker-tulip_contig_560_pilon_pilon-augustus-gene-0.37-mRNA-1	87.0561332370312	76.0544371172654	72.6111530846063	40.6873670062407	47.6797763769014	41.4578777334257	30.9763652929378	33.9086390816916	30.3525013965708	21.7846930042005	30.2213315702078	26.6777352594657	28.6919350312192	26.9717889565001	31.4945531663065	25.3505838955232	26.9325955217093	28.4739692939772
maker-tulip_contig_405_pilon_pilon-augustus-gene-0.32-mRNA-1	70.342824957348	30.7411635592096	73.5256512342865	230.873526958784	223.159459688092	217.160311936992	97.594211133774	69.2385983644122	87.2634415151411	522.977863387507	619.537297189259	609.193931042623	674.615571439482	476.002127324901	571.464772116551	1681.26620522371	1202.82895356777	1776.38293954012
augustus_masked-tulip_contig_145_pilon_pilon-processed-gene-2.13-mRNA-1	0	0	0	2.49424472068909	3.168592733908	2.73348644396213	9.14362589972261	7.71573823415737	9.75616116318347	0	0	0	0.284078564665536	0.499477573268521	0	0.387031815198828	0	0.785488808109716
maker-tulip_contig_479_pilon_pilon-augustus-gene-3.34-mRNA-1	0	0	0	39.9079155310254	7.69515378234801	30.5239319575772	144.618572903776	55.4314878401306	106.775763841508	28.7557947655447	27.8546007845891	39.5458193257962	0.284078564665536	0.499477573268521	0.222576347465064	0.580547722798241	0.480939205744809	1.57097761621943
maker-tulip_contig_560_pilon_pilon-augustus-gene-3.32-mRNA-1	109.462986095508	91.6246368420599	75.903346423455	48.9495526435234	47.9815471134641	45.406247041371	88.263980623853	93.401041781905	88.6184638989165	27.0130193252087	35.5009617842802	27.7762302407378	71.1616804487168	55.4420106328059	55.8666632137309	53.4103904974382	58.6745831008667	54.3950999615978
maker-tulip_contig_145_pilon_pilon-augustus-gene-2.60-mRNA-1	0	0	0	0.77945147521534	0.603541473125334	1.21488286398317	9.14362589972261	2.84264040205798	5.42008953510193	0.14523128669467	0	0	0.35509820583192	0	0.111288173732532	0.774063630397655	2.88563523446885	7.06939927298744
maker-tulip_contig_22_pilon_pilon-augustus-gene-0.7-mRNA-1	1.83662728348167	4.19197684898313	2.37769518916847	53.9380420849015	46.4726934306507	45.406247041371	84.5318884198845	113.502570339315	75.0682400611617	10.7471152154056	9.102810713918	9.41567126804672	22.0160887615791	28.9696992495742	24.5946863948895	28.059806601915	33.6657444021366	45.5583508703635
maker-tulip_contig_490_pilon_pilon-augustus-gene-2.45-mRNA-1	86.1378195952904	55.6934067079188	59.8081789890838	26.5013501573216	28.064678500328	32.6499769695477	54.8617553983357	50.5583900080312	43.0897118040603	14.958822529551	11.651597713815	12.5542283573956	14.7720853626079	10.9885066119075	11.9078345893809	19.158074852342	29.3372915504333	16.6916371723315
augustus_masked-tulip_contig_753_pilon_pilon-processed-gene-1.30-mRNA-1	71.7735576111802	120.385590384988	47.3874651201276	0	0	0	0	0	0	0	0	0	210.615847843029	167.804485515292	235.840784892244	0	0	0
maker-tulip_contig_843_pilon_pilon-augustus-gene-8.19-mRNA-1	4.04058002365968	0.399235890379346	2.37769518916847	100.393350007736	61.5612302587841	83.9787779728367	272.629335499893	152.081261510102	224.39170675322	119.380117663019	85.3843644965509	114.2434780523	52.6255541042906	49.9477573268521	70.6679903201577	197.773257566601	134.182038402802	160.436089056409
augustus_masked-tulip_contig_716_pilon_pilon-processed-gene-1.20-mRNA-1	152.807389985675	130.150900263667	138.455019861579	14.9654683241345	11.4672879893813	11.8451079238359	27.9906915297631	23.7563519314845	21.6803581404077	52.86418835686	66.4505182116014	64.1834924771851	71.3037197310496	62.9341742318337	85.4693174265844	15.6747885155525	14.9091153780891	12.5678209297555
maker-tulip_contig_44_pilon_pilon-augustus-gene-0.23-mRNA-1	0	0.598853835569019	0.548698889808108	0.155890295043068	0	0.303720715995793	1.30623227138894	2.23350317304556	0.271004476755096	4.50216988753478	4.18729292840228	0.470783563402336	0.852235693996609	0	0.111288173732532	3.09625452159062	3.36657444021366	1.57097761621943
augustus_masked-tulip_contig_306_pilon_pilon-processed-gene-0.11-mRNA-1	15.6113319095942	13.9732561632771	7.49888482737748	39.5961349409393	29.1208760782974	33.8648598335309	34.8950621071047	25.3807178755177	23.3063850009383	54.171269937112	63.719674997426	56.6509554627478	73.0792107602092	64.9320845249078	70.111549451495	78.3739425777626	69.2552456272525	95.240517983303
maker-tulip_contig_15_pilon_pilon-augustus-gene-3.202-mRNA-1	0	0	0	0	0.301770736562667	0.303720715995793	0.373209220396841	0.203045743004141	0.813013430265289	0.14523128669467	0.18205621427836	0.156927854467445	0.142039282332768	0	0.111288173732532	4.06383405958769	3.84751364595847	3.14195523243886
maker-tulip_contig_837_pilon_pilon-augustus-gene-5.2-mRNA-1	39.6711493232041	57.2903502694361	44.2617104445207	83.8689787331706	90.8329917053628	81.2452915288745	137.154388495839	131.776687209688	127.64310855165	91.9314044777262	81.3791277824269	72.0298852005574	163.41619432385	126.367826036936	133.990961173968	116.690092282447	105.325686058113	148.457384732736
augustus_masked-tulip_contig_362_pilon_pilon-processed-gene-3.5-mRNA-1	2.02029001182984	3.19388712303477	1.82899629936036	9.66519829267022	14.1832246184454	14.8823150837938	13.8087411546831	9.74619566419879	8.94314773291818	12.0541967956576	15.4747782136606	15.849713301212	12.8545550511155	12.486939331713	9.23691841980014	11.0304067331666	12.0234801436202	9.42586569731659
augustus_masked-tulip_contig_514_pilon_pilon-processed-gene-1.46-mRNA-1	0	0	0	8.10629534223954	7.84603915062934	3.64464859194951	1.11962766119052	0.609137229012424	0.813013430265289	0.580925146778681	0.18205621427836	0.156927854467445	0.142039282332768	0	0	0.387031815198828	0	0.392744404054858
maker-tulip_contig_667_pilon_pilon-augustus-gene-0.75-mRNA-1	17.9989473781204	12.7755484921391	11.3397770560342	33.0487425491304	33.3456663901747	29.309049093594	38.8137589212715	38.5786911707869	36.3145998851829	155.542708049992	170.040504135988	164.303463627415	56.6026540096081	46.950891887241	51.3038480906971	72.3749494421807	71.6599416559765	75.6032977805601
augustus_masked-tulip_contig_126_pilon_pilon-processed-gene-0.59-mRNA-1	5.69354457879318	8.76123161437475	4.5724907484009	1.40301265538761	2.40511277040446	1.67046393797686	1.44991782124173	1.42132020102899	1.62602686053058	2.15232766881501	2.70717590631921	1.05769373911058	0	0	0	0.387031815198828	0	0.196372202027429
maker-tulip_contig_199_pilon_pilon-augustus-gene-3.73-mRNA-1	110.748625193945	102.631570339818	114.678067969895	52.0673585443847	63.5227400464414	58.618098187188	72.5891933671856	80.6091599726441	78.3202937822229	32.3865769329115	38.7779736412907	29.0316530764774	86.357753069088	77.4190238566208	89.2531153334905	41.9929519490728	43.7654677227776	39.2744404054858
augustus_masked-tulip_contig_781_pilon_pilon-processed-gene-6.14-mRNA-1	22.2231901301282	12.5759305469494	13.3516729853306	39.4402446458962	27.612022395484	34.1685805495267	38.8137589212715	30.2538157076171	36.3145998851829	53.1546509302493	43.6934914268064	50.2169134295825	40.3391561825062	39.9582058614817	32.0509940349692	39.283729242681	33.1848051963918	42.6127678399521
maker-tulip_contig_531_pilon_pilon-augustus-gene-0.48-mRNA-1	2.57127819687434	0.399235890379346	2.0118959292964	16.9920421596944	14.7867660915707	16.5527790217707	9.51683512011945	5.27918931810768	5.96209848861212	2.75939444719873	3.09495564273212	3.92319636168613	10.3688676102921	9.4900738921019	8.45790120367241	17.9969794067455	16.3519329953235	6.28391046487773
augustus_masked-tulip_contig_199_pilon_pilon-processed-gene-4.13-mRNA-1	231.41503771869	233.952231762297	256.059481910451	40.3755864161546	32.2894688122054	36.9020669934888	56.1679876697246	50.5583900080312	54.7429043045295	47.7810933225465	50.9757399979408	50.0599855751151	74.9967410717016	67.9289499645189	83.3548421256663	30.7690293083068	34.6276228136262	26.5102472737029
maker-tulip_contig_759_pilon_pilon-augustus-gene-1.55-mRNA-1	40.9567884216412	37.1289378052792	41.5182159954802	12.6271138984885	9.95843430656801	9.41534219586957	14.3685549852784	11.9796988372443	15.7182596517956	17.2825231166658	18.7517900706711	18.3605589726911	31.8167992425401	23.974923516889	34.4993338570848	18.5775271295437	8.65690570340656	11.3895877175909
augustus_masked-tulip_contig_707_pilon_pilon-processed-gene-0.82-mRNA-1	2.02029001182984	0.598853835569019	1.28029740955225	15.5890295043068	12.5234855673507	12.1488286398317	4.10530142436525	2.63959465905384	5.69109401185703	4.64740117422945	5.64374264262916	7.53253701443738	6.32074806380818	3.49634301287965	5.56440868662659	4.45086587478652	5.2903312631929	6.48028266690515
augustus_masked-tulip_contig_610_pilon_pilon-processed-gene-3.18-mRNA-1	11.6515634864077	6.91276944191838	7.04529374513611	3.54026860042807	4.87208854180426	3.1905861215358	5.26598209979943	6.96649944247209	6.0406897868711	3.23575306755725	2.08636421563001	5.12055589127274	4.03746660030893	0.499477573268521	3.31527469549212	0.20125654390339	0.245278994929853	0
maker-tulip_contig_773_pilon_pilon-augustus-gene-2.54-mRNA-1	0	0.199617945189673	0	133.286202261823	80.2710159256694	145.78594367798	68.1106827224235	199.593965373071	59.3499804093661	4.79263246092412	7.2822485711344	3.4524127982838	57.6679486271039	45.951936740704	49.189372789779	220.221102848133	85.1262394168312	107.808338913058
augustus_masked-tulip_contig_196_pilon_pilon-processed-gene-3.6-mRNA-1	0.367325456696334	0	0	24.0071054366325	19.7659832448547	18.982544749737	9.14362589972261	6.29441803312838	5.14908505834683	3.48555088067208	5.09757399979408	3.60934065275124	1.3493731821613	1.49843271980556	1.55803443225544	4.06383405958769	3.84751364595847	5.30204945474058
maker-tulip_contig_689_pilon_pilon-augustus-gene-4.30-mRNA-1	229.578410435209	202.412596422328	203.750187748744	549.980960911944	456.428239051034	555.808910272301	528.277651471729	448.934137782157	455.558525425317	133.758015045791	140.001228780059	141.391996875168	516.95196805011	359.623852753335	401.416442653242	1178.51187728043	676.681462482946	1142.68984359761
maker-tulip_contig_704_pilon_pilon-augustus-gene-2.66-mRNA-1	24.7944683270026	15.9694356151738	13.5345726152667	58.6147509361936	66.3895620437868	59.9848414091691	41.9860372946446	101.928962988079	42.8187073273052	28.4653321921554	21.1185208562898	23.5391781701168	47.0860220933126	37.9602955684076	53.0844588704176	74.8906562409731	79.3549689478935	79.5307418211087
maker-tulip_contig_292_pilon_pilon-augustus-gene-0.43-mRNA-1	0	0	0	0	0	0	0	0	0	0	0	0	0	0	0	6.77305676597948	11.5425409378754	6.48028266690515
maker-tulip_contig_547_pilon_pilon-augustus-gene-1.28-mRNA-1	0.183662728348167	0.598853835569019	0.365799259872072	4.67670885129204	5.73364399469067	2.73348644396213	4.47851064476209	4.06091486008283	9.21415220967328	1.4523128669467	3.6411242855672	1.88313425360934	2.20160887615791	1.49843271980556	2.22576347465064	12.3850180863625	34.6276228136262	19.244475798688
maker-tulip_contig_628_pilon_pilon-augustus-gene-2.6-mRNA-1	74.750730437704	52.2999016396943	66.7583649266532	52.690919724557	49.1886300597147	51.4806613612869	26.4978546481757	18.2741168703727	25.7454252917342	56.349739237532	44.4217162839199	56.023244044878	7.52808196363671	6.9926860257593	5.67569686035912	10.4498590103683	4.32845285170328	10.2113545054263
maker-tulip_contig_272_pilon_pilon-augustus-gene-4.56-mRNA-1	0	0	0	1.24712236034454	1.20708294625067	0.607441431991585	1.30623227138894	1.01522871502071	0.271004476755096	0.871387720168021	0.18205621427836	0.313855708934891	2.20160887615791	1.49843271980556	0.890305389860254	47.9919450846546	91.3784490915137	67.9447819014904
maker-tulip_contig_69_pilon_pilon-augustus-gene-2.30-mRNA-1	4.40790548035601	0.598853835569019	1.46319703948829	14.4977974390053	9.95843430656801	11.5413872078401	42.5458511252399	29.2385869925964	43.6317207575705	19.1705298436965	32.5880623558265	32.9548494381635	5.75259093447711	2.99686543961113	3.22735703824342	14.1266612547572	0.961878411489618	5.30204945474058
augustus_masked-tulip_contig_125_pilon_pilon-processed-gene-0.397-mRNA-1	0	0	0	0	0	0	0	0	0	0	0	0	0	0	0	39.8429902156433	14.7071209116763	47.4553063419485
maker-tulip_contig_653_pilon_pilon-augustus-gene-0.10-mRNA-1	0	0	0	2.49424472068909	6.03541473125334	5.77069360392006	158.800523278856	156.548267856193	83.4693788405697	0	0	0	0	0	0	0	0	0
maker-tulip_contig_323_pilon_pilon-augustus-gene-8.54-mRNA-1	0	0	0.548698889808108	0	0	0.151860357997896	0.373209220396841	0.203045743004141	0	2.32370058711472	1.8205621427836	1.09849498127212	0.35509820583192	0	0.556440868662659	5.22492950518417	11.0616017321306	3.92744404054858
augustus_masked-tulip_contig_648_pilon_pilon-processed-gene-2.50-mRNA-1	0	1.39732561632771	0	0	0.150885368281334	0.151860357997896	0.186604610198421	0	1.08401790702039	2.32370058711472	3.09495564273212	3.92319636168613	9.3745926339627	9.98955146537043	11.7587084365793	0	0.961878411489618	1.96372202027429
maker-tulip_contig_745_pilon_pilon-augustus-gene-1.17-mRNA-1	5.14255639374868	2.59503328746575	6.03568778788919	7.01506327693806	6.78984157266001	5.46697288792427	9.14362589972261	5.68528080411596	8.94314773291818	8.56864591498554	10.5592604281449	10.0433826859165	7.31502304013756	4.99477573268521	6.23213772902178	5.99899313558183	3.84751364595847	7.06939927298744
augustus_masked-tulip_contig_360_pilon_pilon-processed-gene-1.8-mRNA-1	3.12226638191884	1.79656150670706	3.29219333884865	2.80602531077522	3.47036347047067	2.12604501197055	5.22492908555578	10.3553328932112	6.50410744212231	80.1676702554579	90.6639947106233	71.4021737826876	11.1500836631223	10.4890290386389	16.1367851912171	39.4772451502804	28.3754131389437	25.1356418595109
maker-tulip_contig_689_pilon_pilon-augustus-gene-4.19-mRNA-1	27.7330719805732	29.5434558880716	34.9338293177829	43.8051729071021	40.2863933311161	37.6613687834783	41.9860372946446	33.5025475956833	30.894510350081	40.955222847897	49.3372340694356	36.8780457998497	54.6851236981157	51.4461900466577	57.6472739934514	92.113572017321	64.4458535698044	71.0867371339293
maker-tulip_contig_827_pilon_pilon-augustus-gene-2.53-mRNA-1	51.6092266658349	44.7144197224868	46.2736063738171	16.056700389436	14.7867660915707	17.3120808117602	16.7944149178579	11.9796988372443	15.9892641285507	28.61056347885	26.5802072846406	24.323817442454	30.9645635485435	30.4681319693798	37.9492672427933	27.6727747867162	16.3519329953235	19.244475798688
maker-tulip_contig_211_pilon_pilon-augustus-gene-2.74-mRNA-1	7.34650913392668	8.18433575277659	1.46319703948829	5.30027003146431	4.07390494359601	10.7820854178506	15.3015780362705	14.0101562672858	12.4662059307344	33.2579646530795	41.1447044269094	26.9915909684006	33.8763688363652	27.9707441030372	43.736252276885	23.0283930043302	31.2610483734126	26.7066194757303
maker-tulip_contig_396_pilon_pilon-augustus-gene-0.0-mRNA-1	1.83662728348167	0.998089725948365	0.731598519744144	10.4446497678856	12.5234855673507	10.1746439858591	13.4355319342863	14.0101562672858	13.5502238377548	180.66772064817	102.315592424438	166.971237153362	4.54525703464858	4.99477573268521	5.34183233916152	6.19250904318124	6.73314888042733	4.90930505068572
augustus_masked-tulip_contig_2_pilon_pilon-processed-gene-5.2-mRNA-1	0.734650913392668	0.199617945189673	0.914498149680181	62.6678986073133	38.7775396483027	93.0903994527105	983.966109576272	345.786900336053	349.595775014074	828.399259306399	1069.21614645681	1165.66010298418	75.4228589186999	39.4587282882132	9.1256302460676	23.6089407271285	18.7566290240475	43.0055122440069
maker-tulip_contig_177_pilon_pilon-augustus-gene-0.11-mRNA-1	1.28563909843717	0.598853835569019	1.28029740955225	19.3303965853404	39.5319664897094	44.1913641773878	30.603156072541	28.2233582775757	36.0435954084278	5.95448275448148	5.64374264262916	6.9048255965676	12.4284372041172	17.9811926376668	18.8077013607979	19.7386225751402	16.3519329953235	22.1900588290995
augustus_masked-tulip_contig_327_pilon_pilon-processed-gene-5.22-mRNA-1	12.121740070979	2.99426917784509	7.13308556750541	35.5429872698195	14.6358807232894	22.019751909695	32.6558067847236	17.0558424123479	34.6885730246523	28.3201009054607	22.9390829990734	25.736168132661	13.6357711039457	6.49320845249078	6.67729042395191	13.1590817167601	10.5806625263858	7.85488808109716
maker-tulip_contig_559_pilon_pilon-augustus-gene-2.0-mRNA-1	0.550988185044501	2.79465123265542	0.365799259872072	14.9654683241345	14.032339250164	11.8451079238359	2.42585993257947	1.82741168703727	1.62602686053058	0.871387720168021	0.72822485711344	0.941567126804672	5.04239452281327	3.99582058614817	3.44993338570848	1.3546113531959	2.40469602872404	1.96372202027429
augustus_masked-tulip_contig_88_pilon_pilon-processed-gene-0.8-mRNA-1	0	1.79656150670706	0	0.623561180172272	0.754426841406668	1.06302250598527	0.933023050992103	2.63959465905384	1.08401790702039	0.580925146778681	2.00261835706196	2.51084567147913	1.3493731821613	0.998955146537043	2.55962799584823	2.12867498359355	4.32845285170328	3.14195523243886
maker-tulip_contig_25_pilon_pilon-augustus-gene-0.3-mRNA-1	7.64771600841768	0.654746860222127	2.30453533719405	1.55110843567853	1.01394967485056	2.84890031604054	1.20359973577981	5.32385938156859	2.64500369312974	3.16604204994381	1.82784439135474	0.889780934830415	1.71157335210986	0.499477573268521	2.87123488229932	1.2868807855361	3.31367112758173	2.33290176008586
maker-tulip_contig_187_pilon_pilon-augustus-gene-1.92-mRNA-1	0.734650913392668	0.399235890379346	0.548698889808108	0.155890295043068	0.754426841406668	0.607441431991585	0.186604610198421	0.812182972016566	0.271004476755096	1.16185029355736	0.72822485711344	0.627711417869781	0.426117846998304	0	0.445152694930127	4.83789768998534	7.21408808617213	4.12381624257601
augustus_masked-tulip_contig_190_pilon_pilon-processed-gene-3.41-mRNA-1	0.183662728348167	0.598853835569019	0.182899629936036	0.623561180172272	0.452656104844001	0.455581073993689	0.559813830595262	0.203045743004141	0.271004476755096	6.39017661456549	3.27701185701048	5.49247490636059	5.46851236981157	5.49425330595373	5.67569686035912	5.41844541278359	8.17596649766175	7.85488808109716
augustus_masked-tulip_contig_916_pilon_pilon-processed-gene-3.5-mRNA-1	0	0	0	18.8627257002112	21.4257222959494	21.7160311936992	41.4262234640494	33.096456109675	39.0246446527339	3.9212447407561	1.8205621427836	2.35391781701168	26.8454243608932	10.4890290386389	12.4642754580436	73.7295607953767	25.9707171102197	43.7910010521166
augustus_masked-tulip_contig_881_pilon_pilon-processed-gene-1.51-mRNA-1	0	0	0	0.155890295043068	0	0.151860357997896	0.373209220396841	0	0	0	0	0	7.17298375780479	6.49320845249078	6.89986677141697	21.2867498359355	18.7566290240475	31.4195523243886
maker-tulip_contig_819_pilon_pilon-augustus-gene-0.37-mRNA-1	9.55046187410469	7.58548191720757	6.76728630763334	32.7369619590443	35.1562908095507	24.905098711655	12.1292996628973	10.5583786362154	17.6152909890813	36.8887468204462	42.965266569693	47.0783563402336	53.2647308747881	54.9425330595373	48.966796442314	36.1874747210904	26.9325955217093	42.2200234358972
augustus_masked-tulip_contig_187_pilon_pilon-processed-gene-1.16-mRNA-1	0	0.199617945189673	0	0	0.452656104844001	0	0	0	0	0.435693860084011	0	0.156927854467445	0	0.499477573268521	0.111288173732532	17.8034634991461	31.2610483734126	20.2263368088252
maker-tulip_contig_156_pilon_pilon-augustus-gene-0.22-mRNA-1	321.042449152596	304.417366414251	328.487735365121	113.792120866687	109.675556496336	117.867935463647	94.9145689313247	116.345210741373	101.155130993607	116.520513628001	139.808249192924	120.333848084182	90.9264465853215	106.128994768095	99.8755715162606	60.9265483485994	72.1072151173192	62.1184186673366
maker-tulip_contig_593_pilon_pilon-augustus-gene-1.26-mRNA-1	146.379194493489	189.637047930189	183.997027715652	17.4597130448236	23.3872320836067	18.8306843917391	31.3495745133347	39.5939198858076	44.7157386645909	17.5729856900551	19.4800149277845	20.5575489352353	29.7572296487149	24.9738786634261	31.9397058612366	52.6363268670406	30.7801091676678	39.4708126075132
maker-tulip_contig_236_pilon_pilon-augustus-gene-7.81-mRNA-1	17.8152846497722	37.1289378052792	25.9717474509171	184.106438445863	167.784529528843	183.902893535452	309.57704831918	228.223415136655	233.876863439648	34.2745836599422	27.4904883560324	42.6843764151451	180.460908203782	123.370960597325	198.871966460034	538.941802664367	303.472638824974	480.719150563146
maker-tulip_contig_66_pilon_pilon-augustus-gene-2.2-mRNA-1	0	0.199617945189673	0	7.7945147521534	5.28098788984667	3.79650894994741	21.8327393932152	24.7715806465052	26.2874342452444	12.344659369047	24.2134764990219	20.4006210807679	3.69302134065197	5.49425330595373	3.56122155944102	1.3546113531959	0	3.14195523243886
maker-tulip_contig_677_pilon_pilon-augustus-gene-1.37-mRNA-1	1.46930182678534	0.798471780758692	0.731598519744144	3.8972573760767	2.56505126078267	2.88534680196003	3.91869681416683	1.62436594403313	2.43904029079587	5.95448275448148	4.00523671412392	5.49247490636059	5.18443380514604	4.49529815941669	2.89349251704583	2.12867498359355	2.88563523446885	6.0875382628503
maker-tulip_contig_339_pilon_pilon-augustus-gene-3.29-mRNA-1	53.0785284926203	102.603623827492	67.1241641865252	26.1895695672354	30.4788443928294	28.8534680196003	37.694131260081	52.5888474380726	36.8566088386931	10.4566526420163	7.82841721396948	6.12018632423037	48.080297069642	36.4618628486021	49.6345254847092	13.7396294395584	14.9091153780891	10.996843313536
maker-tulip_contig_103_pilon_pilon-augustus-gene-0.11-mRNA-1	3.85691729531151	15.1709638344151	5.85278815795316	0.623561180172272	0.905312209688001	0.455581073993689	0.373209220396841	1.21827445802485	0.813013430265289	1.74277544033604	2.18467457134032	2.04006210807679	0.426117846998304	0	0.556440868662659	2.12867498359355	3.36657444021366	0.589116606082287
augustus_masked-tulip_contig_59_pilon_pilon-processed-gene-0.4-mRNA-1	8.99947368906018	11.7774587661907	10.4252789063541	5.14437973642124	5.43187325812801	4.55581073993689	10.8230673915084	10.1522871502071	7.8591298258978	16.4111353964977	10.0130917853098	9.25874341357927	5.39749272864519	3.49634301287965	5.89827320782418	9.28876356477186	8.65690570340656	9.22949349528916
augustus_masked-tulip_contig_281_pilon_pilon-processed-gene-1.68-mRNA-1	285.779205309748	302.620804907544	279.287734912327	40.8432573012838	40.8899348042414	45.8618281153647	43.6654787864304	47.3096581199649	34.9595775014074	64.3374600057389	66.4505182116014	62.6142139325107	79.8260766710157	82.413799589306	92.5917605454664	29.4144179551109	28.3754131389437	31.4195523243886
maker-tulip_contig_895_pilon_pilon-augustus-gene-2.24-mRNA-1	15.0603437245497	13.3744023277081	22.6795541120685	0.311780590086136	0.150885368281334	0.911162147987378	0.559813830595262	0.812182972016566	1.08401790702039	13.216047089215	9.28486692819636	13.8096511931352	2.41466779965706	0.998955146537043	2.22576347465064	4.2573499671871	1.44281761723443	1.76734981824686
maker-tulip_contig_276_pilon_pilon-augustus-gene-2.13-mRNA-1	24.7944683270026	17.1671432863119	22.3137548521964	38.972573760767	43.3041006967427	38.7243912894636	50.9430585841688	45.6852921759318	39.5666536062441	27.739175758682	22.2108581419599	25.736168132661	31.6747599602073	40.4576834347502	32.3848585561667	21.0932339283361	21.1613250527716	21.7973144250446
maker-tulip_contig_339_pilon_pilon-augustus-gene-1.6-mRNA-1	0	0	0	23.8512151415894	30.4788443928294	32.8018373275456	32.844277441024	48.7309783209939	22.493371570673	0	0	0	0.0710196411663841	0	0	0	0	0
maker-tulip_contig_276_pilon_pilon-augustus-gene-3.65-mRNA-1	8.81581096071202	5.78892041050052	6.95018593756937	725.045762245309	633.567661413319	753.68295674356	782.433130561978	741.32000770812	715.1808141567	40.2290664144236	39.6882547126825	43.4690156874824	97.083849474447	66.9299948179819	59.0940202519744	271.502818361978	219.789217025378	214.63481681598
maker-tulip_contig_597_pilon_pilon-augustus-gene-5.26-mRNA-1	186.050343816693	117.974205607097	111.020075371174	61.888447132098	62.3156571001907	58.618098187188	86.0247253014719	89.7462184078305	98.6456295388551	93.8194112047569	92.6666130676853	87.5657427928345	125.207627376335	108.886110972538	113.068784512252	77.2128471321661	84.6453002110864	66.7665486893258
maker-tulip_contig_620_pilon_pilon-augustus-gene-0.99-mRNA-1	7.89749731897118	9.38204342391463	5.85278815795316	12.6271138984885	13.4287977770387	9.71906291186537	11.7560904425005	11.9796988372443	7.8591298258978	16.1206728231084	20.0261835706196	16.1635690101469	24.2887172789034	32.4660422624539	26.0414326534124	18.9645589447425	20.6803858470268	21.4045700209898
augustus_masked-tulip_contig_870_pilon_pilon-processed-gene-2.22-mRNA-1	10.6524382441937	31.140399449589	8.23048334712163	0	0	0	0	0	0	0	0.18205621427836	0	33.9473884775316	33.4649974089909	44.9604221879428	0	0	0
maker-tulip_contig_375_pilon_pilon-augustus-gene-0.5-mRNA-1	98.8105478513139	72.660932049041	85.5970268100649	41.6227087764992	51.6027959522161	36.9020669934888	67.7374735020267	54.2132133821057	59.3499804093661	47.7810933225465	46.9705032838169	42.99823212408	45.2395114229867	35.462907702065	54.7537814764056	41.7994360414734	43.2845285170328	56.751566385927
maker-tulip_contig_360_pilon_pilon-augustus-gene-1.42-mRNA-1	175.030580115803	216.385852585606	176.863942148147	43.8051729071021	44.2094129064307	48.291593843331	57.4742199411136	83.8578918607104	65.0410744212231	94.9812614983143	108.323447495624	101.37539398597	148.573089320075	122.871483024056	112.289767296125	104.111558288485	101.478172412155	81.6908360434104
augustus_masked-tulip_contig_234_pilon_pilon-processed-gene-2.43-mRNA-1	213.783415797266	222.574008886485	203.201488858936	76.0744639810172	74.5373719309788	82.4601743928577	61.0197075348835	63.147226074288	55.8269222115499	123.737056263859	108.869616138459	122.403726484607	237.347640778056	234.254981862936	211.113665570613	226.994159614112	158.709937895787	234.075664816695
maker-tulip_contig_159_pilon_pilon-augustus-gene-1.5-mRNA-1	847.603491326791	914.649424859082	851.214877722312	33.3605231392166	34.854520072988	35.6871841295056	61.3929167552804	72.2842845094743	56.9109401185703	95.4169553583983	114.149246352532	101.218466131502	191.824050790403	196.294686294529	254.07090063137	50.8946836986458	53.3842518376738	50.0749115169944
maker-tulip_contig_187_pilon_pilon-augustus-gene-1.84-mRNA-1	4.04058002365968	2.39541534227608	2.37769518916847	2.65013501573216	2.715936629064	4.2520900239411	2.61246454277789	3.65482337407455	2.16803581404077	13.0708158025203	7.10019235685604	6.12018632423037	6.74686591080649	2.99686543961113	5.23054416542899	11.8044703635642	14.4281761723443	10.0149823033989
augustus_masked-tulip_contig_661_pilon_pilon-processed-gene-0.12-mRNA-1	15.6113319095942	20.9598842449157	19.5702604031559	13.4065653737038	12.674370935632	13.9711529358065	7.83739362833367	8.3248754631698	8.13013430265289	21.3489991441165	24.0314202847435	17.4189918458864	40.2681365413398	33.4649974089909	43.8475404506175	12.3850180863625	13.9472369665995	11.1932155155634
augustus_masked-tulip_contig_254_pilon_pilon-processed-gene-0.37-mRNA-1	0	2.79465123265542	0	4.67670885129204	4.52656104844001	3.03720715995793	3.17227837337315	6.49746377613252	5.96209848861212	2.46893187380939	1.63850592850524	1.09849498127212	1.27835354099491	0.499477573268521	1.00159356359279	1.3546113531959	3.84751364595847	2.94558303041143
maker-tulip_contig_59_pilon_pilon-augustus-gene-0.43-mRNA-1	141.420300828089	128.753574647339	134.24832837305	105.070058859028	103.205591904432	115.413872078401	101.139698727544	90.9644928658553	97.2906071550796	68.258704746495	82.2894088538188	65.5958431673921	78.405683847688	62.9341742318337	84.8015883841892	170.681030502683	122.639497464926	158.07962263208
augustus_masked-tulip_contig_66_pilon_pilon-processed-gene-3.3-mRNA-1	12.3054027993272	4.19197684898313	7.86468408724955	21.3569704209003	5.43187325812801	3.64464859194951	14.18195037508	21.3198030154348	17.3442865123262	87.7196971635808	48.7910654266005	28.7177973675425	18.8202049090918	2.49738786634261	10.0159356359279	63.8602495078066	39.4370148710743	31.2231801223612
maker-tulip_contig_59_pilon_pilon-augustus-gene-0.39-mRNA-1	313.328614561973	301.223479291217	308.368776072157	26.9690210424508	35.9107176509574	37.6613687834783	48.7038032617878	44.467017717907	53.9298908742642	44.0050798684851	45.3319973553117	40.8012421615358	70.5225036782194	71.4252929773985	72.003448404948	25.3505838955232	28.8563523446885	21.993686627072
maker-tulip_contig_194_pilon_pilon-augustus-gene-1.21-mRNA-1	3.48959183861517	5.1900665749315	6.03568778788919	4.20903796616284	2.56505126078267	1.36674322198107	3.54548759376999	3.4517776310704	2.98104924430606	13.651740949299	11.10542907098	11.9265169395258	34.4445259656963	28.4702216763057	26.0414326534124	2.70922270639179	4.32845285170328	3.92744404054858
maker-tulip_contig_807_pilon_pilon-augustus-gene-1.37-mRNA-1	32.5083029176256	39.5243531475553	36.7628256171433	13.2506750786608	15.9938490378214	12.7562700718233	14.9283688158737	13.8071105242816	17.3442865123262	15.1040538162457	16.203003070774	15.2220018833422	40.8362936706708	35.9623852753335	37.0589618529331	15.2877567003537	14.9091153780891	14.9242873540846
maker-tulip_contig_58_pilon_pilon-augustus-gene-5.7-mRNA-1	403.690676909271	262.69721586961	313.124166450494	131.259628426263	148.018546283988	144.722921171995	230.083484374653	293.401098640984	191.329160589098	95.562186645093	83.0176337109322	87.7226706473019	94.8822405982891	69.926860257593	85.6918937740495	60.7639949862159	60.1174007181011	53.4132389514607
maker-tulip_contig_60_pilon_pilon-augustus-gene-0.77-mRNA-1	0	0	0	0	0	0	0	0	0	0	0	0	0	0	0	163.907973736703	118.311044613223	192.641130188908
augustus_masked-tulip_contig_465_pilon_pilon-processed-gene-0.126-mRNA-1	31.0390010908402	34.3342865726238	35.482528207591	22.4482024862018	23.2363467153254	28.0941662296108	16.2346010872626	14.6192934962982	17.3442865123262	11.908965508963	17.1132841421658	18.2036311182237	12.8545550511155	13.4858944782501	11.5739700681833	27.6727747867162	20.6803858470268	24.5465252534286
maker-tulip_contig_412_pilon_pilon-augustus-gene-0.58-mRNA-1	6.06087003548951	4.79083068455215	2.92639407897658	8.2621856372826	7.39338304578534	10.9339457758485	6.3445567467463	15.2284307253106	12.4662059307344	0.435693860084011	0	0.470783563402336	4.40321775231581	7.99164117229634	7.90146033500976	0.967579537997069	2.40469602872404	2.16009422230172
maker-tulip_contig_329_pilon_pilon-augustus-gene-0.19-mRNA-1	3.09839022723358	4.75290327496611	2.92639407897658	3.91908201738273	3.64840820504264	2.83067707308079	5.53096064628119	5.05786945823316	2.5257617233575	7.77713540249959	2.94020786059551	5.67921905317685	5.93369101945139	7.632017319543	8.01942579916624	6.60663308544399	11.4126873523243	5.11353214079425
maker-tulip_contig_208_pilon_pilon-augustus-gene-0.17-mRNA-1	0.550988185044501	0.199617945189673	0	14.8095780290915	4.52656104844001	20.501148329716	21.2729255626199	10.5583786362154	15.7182596517956	17.4277544033604	18.5697338563927	17.5759197003539	12.2153782806181	11.487984185176	7.56759581381216	45.4762382858622	25.4897779044749	42.2200234358972
maker-tulip_contig_284_pilon_pilon-augustus-gene-0.0-mRNA-1	0	0.199617945189673	0	159.319881534016	169.595153948219	153.378961577875	20.3399025116278	17.4619338983562	17.8862954658364	10.1661900686269	11.4695414995367	11.1418776671886	3.05384457015451	0.998955146537043	2.33705164838317	11.6109544559648	11.0616017321306	8.64037688920687
maker-tulip_contig_59_pilon_pilon-augustus-gene-1.97-mRNA-1	0.734650913392668	0.598853835569019	0	33.0487425491304	25.6505126078267	28.7016076616024	16.0479964770642	10.9644701222236	17.0732820355711	5.66402018109214	4.00523671412392	4.70783563402336	2.69874636432259	2.49738786634261	1.66932260598798	15.2877567003537	14.9091153780891	11.7823321216457
maker-tulip_contig_317_pilon_pilon-augustus-gene-1.10-mRNA-1	4.04058002365968	7.18624602682823	4.20669148852883	0	0	0	0	0.203045743004141	0	1.01661900686269	0.54616864283508	0.941567126804672	43.819118599659	36.9613404218706	49.4119491372441	0	0	0
maker-tulip_contig_767_pilon_pilon-augustus-gene-0.47-mRNA-1	0	0	0	0	0	0.455581073993689	15.3015780362705	5.8883265471201	12.1952014539793	0	0	0	9.58765155746185	7.49216359902782	11.3513937207182	28.4468384171138	13.9472369665995	27.6884804858675
maker-tulip_contig_362_pilon_pilon-augustus-gene-1.36-mRNA-1	188.805284741916	93.6208162939566	144.124908389596	57.367628575849	70.3125816191014	63.4776296431207	132.30266863068	149.238621108044	126.55909064463	28.4653321921554	31.859837498713	28.2470138041402	66.6874430552346	56.9404433526114	73.3389064897384	15.0942407927543	20.199446641282	12.5678209297555
maker-tulip_contig_44_pilon_pilon-augustus-gene-3.16-mRNA-1	22.2231901301282	17.1671432863119	20.3018589229	17.9273839299528	6.94072694094134	13.3637115038149	26.8710638685726	8.93401269218222	25.7454252917342	204.63088295279	243.227102275889	272.11289964655	43.6770793173262	32.4660422624539	59.2053084257069	35.4134110906927	21.1613250527716	35.7397407689921
maker-tulip_contig_279_pilon_pilon-augustus-gene-2.5-mRNA-1	0.183662728348167	0.998089725948365	0.365799259872072	33.6723037293027	37.4195713337707	26.423702291634	4.10530142436525	6.09137229012424	2.43904029079587	1.16185029355736	0.54616864283508	0.627711417869781	0.497137488164689	0.998955146537043	0.890305389860254	1.16109544559648	2.88563523446885	1.76734981824686
augustus_masked-tulip_contig_881_pilon_pilon-processed-gene-1.70-mRNA-1	0	0	0	1.09123206530148	0	3.03720715995793	1.86604610198421	1.21827445802485	2.71004476755096	109.940084027865	71.0019235685604	72.5006687639598	0	0	0.333864521197595	0.193515907599414	1.44281761723443	0.785488808109716
augustus_masked-tulip_contig_663_pilon_pilon-processed-gene-0.0-mRNA-1	0	0	0	2.65013501573216	0.905312209688001	1.82232429597476	4.66511525496052	4.26396060308697	2.16803581404077	1.16185029355736	0.54616864283508	0.627711417869781	0.35509820583192	0	0	0.580547722798241	0.480939205744809	0.196372202027429
maker-tulip_contig_687_pilon_pilon-augustus-gene-2.8-mRNA-1	0	0.199617945189673	0.182899629936036	3.74136708103363	4.22479031187734	3.34092787595372	1.30623227138894	1.21827445802485	1.35502238377548	7.55202690812285	7.64636099969112	8.00332057783971	1.20733389982853	0.499477573268521	0.890305389860254	1.74164316839472	1.44281761723443	1.76734981824686
augustus_masked-tulip_contig_513_pilon_pilon-processed-gene-0.11-mRNA-1	0	0	0	0	0	0.607441431991585	0	0	0	0.14523128669467	0	0	0	0	0	403.674183252377	482.382023362043	431.626100056289
maker-tulip_contig_221_pilon_pilon-augustus-gene-0.37-mRNA-1	176.867207399285	156.899704919083	152.538291366654	32.5810716640012	30.780615129392	34.1685805495267	28.3639007501599	34.1116848246958	27.9134611057749	26.43209417843	28.7648818559809	27.6193023862704	25.6380904610646	19.4796253574723	34.3880456833523	57.2807086494265	50.0176773974601	41.6309068298149
maker-tulip_contig_586_pilon_pilon-augustus-gene-5.38-mRNA-1	18.5095297629283	6.38777424606954	14.0412045901895	44.5846243823175	49.4828565278633	44.7988056093794	56.5355987518155	52.1827559520643	53.9298908742642	27.8844070453767	23.3031954276301	27.9331580952053	19.4593816795892	20.9780580772779	19.3697066381472	29.8014497703097	31.7419875791574	32.2030774104781
augustus_masked-tulip_contig_168_pilon_pilon-processed-gene-0.96-mRNA-1	880.767470184619	704.29802275656	757.667203998928	91.1599678323349	99.8514101675381	99.0296580540082	133.872013402449	167.453854712945	133.575396547819	135.577763068075	121.27674714153	121.896849514678	138.047978499217	148.649520580445	126.624796954612	96.7753702313908	104.306094941934	85.8382169502297
maker-tulip_contig_95_pilon_pilon-augustus-gene-0.39-mRNA-1	1.83662728348167	2.39541534227608	4.02379185859279	28.9955948780106	36.5142591240827	27.9423058716129	11.9426950526989	14.8223392393023	13.2792193609997	57.2211269577001	49.8834027122707	57.7494504440199	4.97137488164688	4.49529815941669	4.11766242810368	8.70821584197362	6.73314888042733	5.30204945474058
maker-tulip_contig_584_pilon_pilon-augustus-gene-3.5-mRNA-1	0.918313641740835	0.798471780758692	0.914498149680181	2.02657383555988	1.810624419376	2.58162608596424	1.30623227138894	2.03045743004141	1.35502238377548	1.4523128669467	1.27439349994852	0.627711417869781	3.26690349365367	2.99686543961113	3.33864521197595	1.54812726079531	3.36657444021366	1.57097761621943
maker-tulip_contig_508_pilon_pilon-augustus-gene-1.29-mRNA-1	184.948367446604	161.890153548825	127.663941695353	101.016911187908	89.7767941273935	94.1534219586957	90.1300267258372	97.0558651559796	94.3095579107735	132.450933465539	129.624024566192	131.034758480317	136.286691398291	114.380364278491	133.323232131573	131.203785352403	122.158558259181	129.802025540131
maker-tulip_contig_257_pilon_pilon-augustus-gene-0.9-mRNA-1	3.85691729531151	2.59503328746575	1.64609666942433	0.467670885129204	0.452656104844001	0.455581073993689	0.373209220396841	0.203045743004141	1.35502238377548	1.01661900686269	1.09233728567016	0.941567126804672	1.70447138799322	0.499477573268521	2.78220434331329	0	0	0.392744404054858
maker-tulip_contig_559_pilon_pilon-augustus-gene-3.13-mRNA-1	0	0	0	12.6271138984885	7.99692451891068	8.80790076387799	2.98567376317473	2.03045743004141	7.04611639563251	0.29046257338934	0.18205621427836	0.941567126804672	0.497137488164689	0	0.222576347465064	1.3546113531959	0.480939205744809	0.785488808109716
augustus_masked-tulip_contig_247_pilon_pilon-processed-gene-1.83-mRNA-1	35.9978947562407	10.5797510950527	34.2022307980388	39.7520252359823	47.0762349037761	35.9909048455014	42.1726419048431	37.9695539417744	46.8837744786317	39.9386038410343	33.4983434272183	45.1952220866243	45.8076685523177	57.9393984991485	41.0653361073042	36.7680224438886	38.4751364595847	40.8454180217052
maker-tulip_contig_689_pilon_pilon-augustus-gene-4.28-mRNA-1	456.585542673543	378.47562407962	429.082531829941	128.609493410531	106.223299270059	109.795038832479	98.5272341847661	100.101551301042	86.7214325616308	122.865668543691	152.563107565266	142.961275419843	86.6439622229886	76.4200687100838	93.0369132403966	95.5968583541104	108.211321292582	94.0622847711385
augustus_masked-tulip_contig_351_pilon_pilon-processed-gene-1.112-mRNA-1	39.7997132330478	29.323876148363	43.5794948248593	1.78026716939184	1.49980056071646	2.29612861292819	15.2306682843951	23.2182807125236	13.3469704801885	2.71001580972255	2.35580741276198	5.63057141829194	31.9155165437613	25.3984346007043	23.3838710646796	0	2.23155791465591	0
maker-tulip_contig_515_pilon_pilon-augustus-gene-7.10-mRNA-1	0	0.798471780758692	0	0	0	0	0	0	0	0	0	0.156927854467445	0	0	0.111288173732532	214.60914152775	310.205787705402	199.31778505784
augustus_masked-tulip_contig_620_pilon_pilon-processed-gene-0.20-mRNA-1	0.183662728348167	0.598853835569019	0.731598519744144	22.4482024862018	26.4049394492334	22.7790536996845	17.1676241382547	51.3705729800478	10.5691745934488	14.3778973827723	16.203003070774	17.5759197003539	3.90608026415112	1.99791029307409	3.67250973317355	9.09524765717245	2.88563523446885	11.1932155155634
maker-tulip_contig_181_pilon_pilon-augustus-gene-1.33-mRNA-1	169.028482153385	166.365587879977	163.183049828931	172.776331802133	158.266680497656	171.447306972465	245.396258687535	233.837629930719	206.543351914129	158.778461117549	185.449742112509	161.745539599596	129.897054282551	138.030627372756	158.198364724269	206.928495155129	221.049277744429	254.926465227968
maker-tulip_contig_44_pilon_pilon-augustus-gene-7.43-mRNA-1	49.9562621107014	63.8777424606954	54.8698889808108	41.9344893665853	52.9607642667481	52.3918235092742	54.6751507881372	76.5482451125613	48.7808058159174	50.2500251963559	50.2475151408274	43.9397992508847	65.4801091554061	55.4420106328059	66.2164633708564	132.1713648904	149.572092986636	114.484993781991
maker-tulip_contig_740_pilon_pilon-augustus-gene-1.6-mRNA-1	0.183662728348167	0	0	1414.86031781089	1442.31323540127	1754.89829702369	3086.62685729208	2128.32547816941	2536.05989347419	1.01661900686269	0.36411242855672	0.784639272337227	92.1124745928001	97.8976043606302	133.545808479038	370.195931237679	203.918223235799	398.831942317708
maker-tulip_contig_230_pilon_pilon-augustus-gene-0.24-mRNA-1	195.41714296245	195.62558628588	212.71226961561	86.9867846340319	80.2710159256694	90.9643544407399	95.7281650317898	88.7309896928098	88.3474594221614	203.759495232622	279.638345131561	253.595412819392	152.053051737228	149.343794407288	136.884453691014	283.500804633141	252.01214381028	224.846171321406
maker-tulip_contig_43_pilon_pilon-augustus-gene-6.38-mRNA-1	0	0	0	6.54739239180886	4.82833178500267	5.16325217192848	0.186604610198421	0.609137229012424	0	2.61416316050406	1.8205621427836	2.82470138041402	0.568157129331073	0	0.445152694930127	1.74164316839472	0.480939205744809	2.16009422230172
maker-tulip_contig_292_pilon_pilon-augustus-gene-0.40-mRNA-1	1.6529645551335	2.1957973970864	2.0118959292964	1.09123206530148	0.452656104844001	0.151860357997896	0.559813830595262	0	0.542008953510193	0.580925146778681	1.45644971422688	1.41235069020701	3.76404098181836	0.998955146537043	4.11766242810368	0.774063630397655	0.480939205744809	0.392744404054858
maker-tulip_contig_598_pilon_pilon-augustus-gene-0.104-mRNA-1	3.12226638191884	1.99617945189673	4.75539037833694	18.8627257002112	16.295619774384	15.0341754417917	19.2202748504373	17.258888155352	19.2413178496118	54.0260386504173	57.1656512834051	57.2786668806175	17.0447138799322	11.487984185176	14.1335980640315	43.7345951174675	30.299169961923	29.0630859000595
augustus_masked-tulip_contig_289_pilon_pilon-processed-gene-0.9-mRNA-1	1.28563909843717	4.39159479417281	4.02379185859279	384.893138461335	387.624511114746	334.700229027364	437.401206305098	277.360484943657	265.042378266484	14.8135912428564	19.6620711420629	20.2436932263004	124.568450605838	136.357377502306	136.884453691014	359.359040412111	277.9828609205	332.850882436492
maker-tulip_contig_234_pilon_pilon-augustus-gene-5.45-mRNA-1	0	0.399235890379346	0	8.88574681745488	7.54426841406668	6.98557646790323	2.42585993257947	3.4517776310704	2.43904029079587	3.19508830728274	3.09495564273212	2.66777352594657	0.568157129331073	1.49843271980556	0.445152694930127	2.32219089119297	3.84751364595847	3.33832743446629
maker-tulip_contig_73_pilon_pilon-augustus-gene-0.41-mRNA-1	0	0	0	0	0	0	0	0	0	0	0	0	0	0	0	51.2817155138447	61.5602183353355	51.4495169311864
maker-tulip_contig_161_pilon_pilon-augustus-gene-0.69-mRNA-1	66.4859076620365	44.9140376676764	71.3308556750541	58.6147509361936	84.1940355009841	76.5376204309398	64.5651951286535	46.7005208909525	39.0246446527339	44.0050798684851	42.2370417125795	56.023244044878	5.18443380514604	2.49738786634261	11.7965464156484	10.2563431027689	5.2903312631929	7.26577147501487
maker-tulip_contig_515_pilon_pilon-augustus-gene-0.14-mRNA-1	0	0	0	0.467670885129204	1.50885368281334	5.46697288792427	303.419096182632	256.649819157235	159.350632331997	6.53540790126016	5.64374264262916	4.23705207062102	0.142039282332768	0.998955146537043	0.445152694930127	0	0	0.196372202027429
maker-tulip_contig_380_pilon_pilon-augustus-gene-0.39-mRNA-1	2349.5972837581	2559.10205733161	2118.70931317904	982.264749066371	1044.12674850683	1053.7590241474	1548.63166003669	1729.13754742327	1170.73933958202	829.99680346004	696.182963400449	691.267198929097	489.112268712887	501.974961134864	546.091068505533	629.120215605694	466.03009036672	413.756229671793
maker-tulip_contig_429_pilon_pilon-augustus-gene-1.16-mRNA-1	8.99947368906018	9.98089725948365	9.32788112673784	22.6040927812449	38.6266542800214	26.2718419336361	23.1389716646042	34.3147305676999	14.9052462215303	11.0375777887949	11.8336539280934	10.9849498127212	22.5132262497437	19.9791029307409	17.1383787548099	17.2229157763478	14.4281761723443	13.9424263439475
maker-tulip_contig_211_pilon_pilon-augustus-gene-1.85-mRNA-1	16.2596613406632	29.8169324729815	21.9442975997256	6.53336226525498	5.49373625912335	6.18223517409436	2.7057668478771	1.62436594403313	4.60707610483664	11.2423539030344	13.2318456537512	10.3023136457878	3.44587298939296	3.0068549910765	3.11161733756159	11.4367901391254	9.34945815967909	9.75380727470239
maker-tulip_contig_429_pilon_pilon-augustus-gene-3.52-mRNA-1	5.87720730714135	3.99235890379346	3.29219333884865	73.8919998504142	91.7383039150508	73.9559943449755	17.72743796885	10.7614243792195	14.092232791265	9.29480234845889	6.91813614257768	8.78795985017694	2.98282492898813	5.49425330595373	3.22735703824342	7.54712039637714	13.9472369665995	10.4077267074537
maker-tulip_contig_31_pilon_pilon-augustus-gene-1.75-mRNA-1	2.203952740178	0.598853835569019	3.47509296878469	1.09123206530148	1.357968314532	1.82232429597476	4.10530142436525	3.85786911707869	0.813013430265289	7.69725819481752	2.91289942845376	4.55090777955591	4.19015882881666	3.99582058614817	6.12084955528925	8.51469993437421	5.77127046893771	5.49842165676801
augustus_masked-tulip_contig_58_pilon_pilon-processed-gene-5.59-mRNA-1	8.26482277566752	2.99426917784509	10.059479646482	14.0301265538761	10.1093196748493	13.9711529358065	7.2775797977384	13.4010190382733	13.5502238377548	10.6018839287109	8.73869828536128	7.06175345103504	21.7320101969135	20.4785805040094	22.814075615169	7.16008858117831	8.65690570340656	8.05126028312459
augustus_masked-tulip_contig_515_pilon_pilon-processed-gene-7.76-mRNA-1	126.727282560235	62.0811809539883	78.6468408724955	28.9955948780106	35.759832282676	28.5497473036045	56.7278015003199	57.8680367561803	67.2091102352639	9.14957106176422	8.01047342824784	11.612661230591	25.709110102231	24.9738786634261	34.3880456833523	3.09625452159062	5.2903312631929	4.51656064663087
augustus_masked-tulip_contig_209_pilon_pilon-processed-gene-1.231-mRNA-1	377.977894940528	348.732550246359	350.801490217317	121.282649543507	118.294128732565	123.614331410288	86.2113299116703	77.563473827582	95.9355847713041	119.670580236408	124.34439435212	122.560654339075	100.634831532766	90.4054407616023	99.4916273168834	105.466169641681	97.1497195604514	107.611966711031
maker-tulip_contig_741_pilon_pilon-augustus-gene-0.22-mRNA-1	0.367325456696334	0.199617945189673	0	4.3649282612059	1.65973905109467	3.64464859194951	3.54548759376999	15.837567954323	5.42008953510193	38.7767535474769	21.1185208562898	29.6593644943472	1.7754910291596	0	0.890305389860254	2.70922270639179	1.44281761723443	3.92744404054858
maker-tulip_contig_623_pilon_pilon-augustus-gene-1.52-mRNA-1	0	0	0	1.24712236034454	0.905312209688001	0.607441431991585	0.373209220396841	0	0	0	0	0.156927854467445	0	0	0	12.1915021787631	14.9091153780891	6.28391046487773
augustus_masked-tulip_contig_690_pilon_pilon-processed-gene-2.19-mRNA-1	15.6113319095942	18.7640868478293	12.0713755757784	0.623561180172272	0.905312209688001	0.455581073993689	0.373209220396841	0.203045743004141	0.542008953510193	0.871387720168021	1.09233728567016	1.41235069020701	57.8099879094366	55.9414882060744	50.0796781796393	0.193515907599414	0.480939205744809	0.785488808109716
maker-tulip_contig_270_pilon_pilon-augustus-gene-3.142-mRNA-1	2759.34883070286	3038.78397962239	2790.68255356404	1045.24442826377	1091.35386877889	1099.62085226277	1770.31793695242	1925.88887239428	1454.75203122136	843.35808183595	692.359782900603	664.589463669631	435.208361067602	433.047056023808	487.219624601024	526.169752762806	411.683960117556	383.318538357541
maker-tulip_contig_42_pilon_pilon-augustus-gene-1.54-mRNA-1	3.85691729531151	1.59694356151738	4.20669148852883	16.5243712745652	14.032339250164	13.3637115038149	96.1013742521866	61.725905873259	73.4422132006311	31.6604204994381	48.7910654266005	44.5675106687545	13.7778103862785	19.4796253574723	19.8092949243907	25.3505838955232	26.9325955217093	32.2050411324983
maker-tulip_contig_927_pilon_pilon-augustus-gene-0.48-mRNA-1	0.918313641740835	2.99426917784509	1.46319703948829	4.20903796616284	4.52656104844001	2.12604501197055	3.35888298357157	3.04568614506212	2.43904029079587	2.9046257338934	2.18467457134032	2.82470138041402	1.70447138799322	1.49843271980556	2.67091616958076	3.28977042919003	3.36657444021366	0.981861010137145
maker-tulip_contig_145_pilon_pilon-augustus-gene-6.27-mRNA-1	0	0	0	35.5429872698195	25.1978565029827	36.598346277493	45.3449202782162	36.3451879977413	48.2387968624072	16.2659041098031	18.9338462849494	19.3021260994958	5.96564985797626	2.99686543961113	2.78220434331329	16.4488521459502	5.2903312631929	12.1750765257006
maker-tulip_contig_61_pilon_pilon-augustus-gene-0.16-mRNA-1	1.28563909843717	1.39732561632771	1.64609666942433	14.1860168489192	18.558900298604	14.4267340098002	10.63646278131	5.68528080411596	5.14908505834683	1.88800672703071	1.27439349994852	1.88313425360934	4.04811954648389	2.99686543961113	3.00478069077836	11.6109544559648	12.0234801436202	17.6734981824686
maker-tulip_contig_465_pilon_pilon-augustus-gene-0.24-mRNA-1	17.631621921424	37.1289378052792	34.5680300579108	14.3419071439623	17.9553588254787	20.3492879717181	7.09097518753998	5.27918931810768	8.13013430265289	11.3280403621843	14.2003847137121	18.2036311182237	28.5498957488864	20.4785805040094	34.6106220308174	28.6403543247132	13.4662977608547	19.8335924047703
augustus_masked-tulip_contig_454_pilon_pilon-processed-gene-0.2-mRNA-1	0	0	0.731598519744144	6.54739239180886	3.01770736562667	3.94836930794531	3.91869681416683	5.27918931810768	2.71004476755096	2.32370058711472	1.8205621427836	1.41235069020701	4.68729631698135	1.99791029307409	4.00637425437114	3.87031815198828	6.73314888042733	9.03312129326173
maker-tulip_contig_39_pilon_pilon-augustus-gene-1.107-mRNA-1	0	0	0	0	0.603541473125334	0.607441431991585	19.0336702402389	2.84264040205798	13.5502238377548	0.14523128669467	0.54616864283508	0.941567126804672	18.2520477797607	13.9853720515186	14.2448862377641	76.4387835017684	82.2406041823623	54.0023555575429
maker-tulip_contig_333_pilon_pilon-augustus-gene-3.69-mRNA-1	0	0	0	31.0221687135705	40.1355079628347	41.3060173754278	4.29190603456367	8.3248754631698	2.71004476755096	1.4523128669467	4.551405356959	3.29548494381635	0.284078564665536	0	0	0.967579537997069	0.961878411489618	0.589116606082287
augustus_masked-tulip_contig_264_pilon_pilon-processed-gene-0.23-mRNA-1	0	0.199617945189673	0	0.155890295043068	0.603541473125334	0	0	0.203045743004141	0	0	0	0	0	0	0.667729042395191	2090.35883388887	3892.24099209274	3332.43626840547
augustus_masked-tulip_contig_806_pilon_pilon-processed-gene-0.7-mRNA-1	0.918313641740835	0.399235890379346	0.731598519744144	3.27369619590443	3.77213420703334	1.67046393797686	5.00660169162362	4.46700634609111	3.25205372106116	20.3744972103953	2.18467457134032	9.96021092304876	0.568157129331073	0.499477573268521	0.111288173732532	0.774063630397655	1.32739220785567	0
maker-tulip_contig_623_pilon_pilon-augustus-gene-0.1-mRNA-1	0	0	0	0.467670885129204	0.301770736562667	0.759301789989482	1.49283688158736	1.21827445802485	1.08401790702039	3.04985702058807	2.91289942845376	3.4524127982838	1.7754910291596	0.998955146537043	1.66932260598798	2.51570679879238	2.88563523446885	4.71293284865829
maker-tulip_contig_732_pilon_pilon-augustus-gene-4.25-mRNA-1	1.7337761556067	3.04616984359441	1.71559852880002	3.94870117344091	5.36699254976703	5.61124022802227	4.26391534303391	5.44771728480111	5.03255313334214	3.37662741565108	4.05621245412186	1.93178188849425	4.28248436233296	5.44930032435957	7.35614828372035	2.33767216380092	2.9000634106412	3.43454981345973
maker-tulip_contig_693_pilon_pilon-augustus-gene-0.6-mRNA-1	0.550988185044501	1.39732561632771	0.731598519744144	4.20903796616284	1.20708294625067	1.51860357997896	1.49283688158736	1.42132020102899	1.08401790702039	6.53540790126016	4.91551778551572	9.10181555911183	2.62772672315621	1.99791029307409	1.89189895345304	1.74164316839472	0	1.57097761621943
augustus_masked-tulip_contig_831_pilon_pilon-processed-gene-0.27-mRNA-1	0	0	0	0	0	0	0	0	0	0.14523128669467	0	0	0	0	0	6.57954085838007	14.9091153780891	11.9787043236732
maker-tulip_contig_801_pilon_pilon-augustus-gene-0.0-mRNA-1	0.918313641740835	1.19770767113804	0.548698889808108	8.2621856372826	7.39338304578534	7.89673861589061	47.024361770002	28.8324955065881	59.3499804093661	3.19508830728274	2.18467457134032	3.13855708934891	3.33792313482005	2.49738786634261	1.22416991105785	11.0304067331666	7.69502729191694	9.03312129326173
maker-tulip_contig_121_pilon_pilon-augustus-gene-4.0-mRNA-1	4970.46441728644	3880.17361859686	4442.99781040619	385.360809346464	538.811650132642	476.537803397399	1218.15489537529	1367.7161248759	1276.16008103975	295.10997456357	302.577428130634	305.067749084714	512.761809221293	481.496380630855	457.728258561903	52.4428109594411	78.8740297421487	60.4826382244481
maker-tulip_contig_715_pilon_pilon-augustus-gene-5.76-mRNA-1	14.1420300828089	7.58548191720757	8.04758371718559	29.4632657631399	44.0585275381494	30.9795130315709	13.4355319342863	10.3553328932112	9.21415220967328	21.3489991441165	16.3850592850524	20.8714046441702	24.4307565612361	31.9665646891854	27.7107552594004	15.4812726079531	10.5806625263858	35.3469963649372
augustus_masked-tulip_contig_401_pilon_pilon-processed-gene-0.8-mRNA-1	0	0	0	0	0	0	0	0	0	0	0	0	0.142039282332768	0	0	10.0628271951695	10.099723320641	9.81861010137145
maker-tulip_contig_43_pilon_pilon-augustus-gene-4.8-mRNA-1	34.5285929294554	45.7125094484351	38.9576211763757	22.2923121911587	17.5027027206347	22.019751909695	16.9810195280563	17.258888155352	14.3632372680201	23.2370058711472	21.3005770705681	24.0099617335191	8.38031765763332	7.99164117229634	10.0159356359279	13.1590817167601	7.69502729191694	9.81861010137145
maker-tulip_contig_555_pilon_pilon-augustus-gene-2.51-mRNA-1	13.7747046261125	11.7774587661907	16.4609666942433	29.4632657631399	37.570456702052	32.6499769695477	32.0959929541283	29.8477242216088	45.5287520948562	33.6936585131635	28.4007694274242	34.8379836917729	101.842165432595	91.9038734814079	85.0241647316543	32.7041883843009	34.6276228136262	34.3651353548001
maker-tulip_contig_770_pilon_pilon-augustus-gene-0.24-mRNA-1	4.59156820870418	9.98089725948365	4.02379185859279	3.11780590086136	2.86682199734534	2.42976572796634	7.2775797977384	4.87309783209939	5.96209848861212	17.4277544033604	6.73607992829932	9.72952697698161	4.26117846998304	4.49529815941669	3.67250973317355	4.64438178238593	4.80939205744809	5.49842165676801
augustus_masked-tulip_contig_357_pilon_pilon-processed-gene-1.54-mRNA-1	1.101976370089	0.998089725948365	0.182899629936036	2.33835442564602	3.621248838752	3.49278823395162	1.11962766119052	1.01522871502071	0.813013430265289	3.04985702058807	2.7308432141754	2.66777352594657	3.47996241715282	5.99373087922226	4.34023877556874	9.67579537997069	4.32845285170328	7.26577147501487
augustus_masked-tulip_contig_1_pilon_pilon-processed-gene-3.61-mRNA-1	0.367325456696334	0.798471780758692	0.731598519744144	12.7830041935316	6.03541473125334	8.65604040588009	11.7560904425005	11.3705616082319	13.2792193609997	2.9046257338934	2.36673078561868	2.19698996254423	5.53953201097796	10.4890290386389	9.4594947672652	7.93415221157596	7.69502729191694	13.1569375358377
maker-tulip_contig_333_pilon_pilon-augustus-gene-3.119-mRNA-1	0.918313641740835	1.59694356151738	1.46319703948829	42.7139408418006	27.0084809223587	37.5095084254804	30.0433422419457	18.4771626133769	23.3063850009383	6.53540790126016	8.73869828536128	6.74789774210015	17.1867531622649	16.9822374911297	17.2496669285424	31.349577031105	18.7566290240475	33.5678642145687
maker-tulip_contig_89_pilon_pilon-augustus-gene-0.30-mRNA-1	4.50524672638054	4.59121273936248	3.80614129896891	126.115248689842	130.677290907415	124.829214274271	23.8723277826839	25.3888397052378	25.1221149951974	12.0541967956576	10.0130917853098	14.5942904654724	3.96218578067257	4.86990633936808	7.58540192160936	14.4672492521322	14.9091153780891	7.06939927298744
maker-tulip_contig_674_pilon_pilon-augustus-gene-9.25-mRNA-1	0.367325456696334	0.798471780758692	0.731598519744144	3.4295864909475	2.715936629064	2.27790536996845	4.47851064476209	5.68528080411596	0.813013430265289	1.16185029355736	1.27439349994852	1.56927854467445	2.41466779965706	0.998955146537043	3.67250973317355	5.99899313558183	4.32845285170328	7.4621436770423
maker-tulip_contig_704_pilon_pilon-augustus-gene-2.26-mRNA-1	2.75494092522251	4.99044862974182	7.31598519744144	4.52081855624897	6.94072694094134	7.59301789989482	17.1676241382547	15.837567954323	16.802277558816	176.891707194108	177.686865135679	186.273363252858	152.40814994306	129.364691476547	251.733848982987	1050.03279590703	465.385631831022	920.005730220525
maker-tulip_contig_852_pilon_pilon-augustus-gene-0.23-mRNA-1	0	0	0	2.65013501573216	1.50885368281334	1.67046393797686	5.4115336957542	4.67005208909525	7.04611639563251	0.14523128669467	0	0.156927854467445	0.213058923499152	0.998955146537043	0.333864521197595	0.580547722798241	0.480939205744809	0.392744404054858
maker-tulip_contig_3_pilon_pilon-augustus-gene-5.29-mRNA-1	0	0.399235890379346	0	0	0.150885368281334	0	0.186604610198421	0.609137229012424	0	0	0	0	0	0	0	4.64438178238593	4.32845285170328	3.53469963649372
maker-tulip_contig_806_pilon_pilon-augustus-gene-1.10-mRNA-1	0	0.199617945189673	0	0	0.150885368281334	0	0.186604610198421	0	0.271004476755096	3.34031959397741	1.45644971422688	2.04006210807679	0.497137488164689	1.49843271980556	0.333864521197595	4.64438178238593	0.480939205744809	2.35646642432915
maker-tulip_contig_669_pilon_pilon-augustus-gene-0.4-mRNA-1	0	0	0.365799259872072	0	0.754426841406668	0	0.373209220396841	0.203045743004141	0	0	0	0.156927854467445	0	0	0.111288173732532	660.2762767292	941.678964848336	701.048761237921
maker-tulip_contig_376_pilon_pilon-augustus-gene-0.40-mRNA-1	2.38761546852617	3.19388712303477	4.02379185859279	11.2241012431009	8.14780988719201	6.83371610990534	5.97134752634946	8.12182972016566	12.4662059307344	14.958822529551	19.4800149277845	19.6159818084307	17.1867531622649	14.9843271980556	16.8045142336123	17.6099475915467	13.9472369665995	16.8880093743589
maker-tulip_contig_474_pilon_pilon-augustus-gene-0.24-mRNA-1	12.6727282560235	3.99235890379346	4.02379185859279	0.935341770258408	0.452656104844001	0.607441431991585	2.05265071218263	1.82741168703727	3.25205372106116	50.5404877697452	79.0123969968083	83.171762867746	5.82361057564349	2.49738786634261	1.66932260598798	4.45086587478652	0.480939205744809	3.92744404054858
maker-tulip_contig_667_pilon_pilon-augustus-gene-0.91-mRNA-1	491.114135602999	430.975143664504	467.674353746444	576.949981954395	554.956384538745	596.355625857739	413.5158161997	344.365580135024	422.76698373795	365.982842470569	422.006304697239	423.077495644233	186.639616985257	151.84118227363	173.164398327819	494.626659824102	337.138383227111	487.395805432079
maker-tulip_contig_317_pilon_pilon-augustus-gene-1.62-mRNA-1	0.367325456696334	3.59312301341411	0.365799259872072	0	0.301770736562667	0.303720715995793	0	1.41928974359895	0	2.52992901422116	1.45644971422688	3.06166244065986	0.568157129331073	0.998955146537043	0.890305389860254	0	1.44281761723443	0
augustus_masked-tulip_contig_272_pilon_pilon-processed-gene-2.50-mRNA-1	108.544672453767	82.4122686715565	100.411896834884	414.044623634389	310.823858659547	420.045750222181	477.34392311807	358.172690659305	443.905332924848	268.236377273588	303.305652987748	282.313210186934	116.171798430736	77.4889507168784	101.941080020736	268.989046722261	194.131110398892	267.987180384812
maker-tulip_contig_618_pilon_pilon-augustus-gene-2.2-mRNA-1	0	0	0	0.935341770258408	1.20708294625067	1.51860357997896	0	0	0.542008953510193	0	0	0	0	0	0	16.2553362383508	28.3754131389437	17.2807537784137
augustus_masked-tulip_contig_33_pilon_pilon-processed-gene-1.16-mRNA-1	8.99947368906018	4.19197684898313	10.6081785362901	1.09123206530148	2.715936629064	2.58162608596424	7.2775797977384	4.46700634609111	4.33607162808154	8.85910848837488	5.4616864283508	7.53253701443738	8.4513372987997	7.99164117229634	6.12084955528925	3.09625452159062	1.44281761723443	2.55283862635658
maker-tulip_contig_417_pilon_pilon-augustus-gene-1.9-mRNA-1	0.183662728348167	0.598853835569019	0.914498149680181	10.6005400629286	10.7128611479747	8.04859897388851	3.17227837337315	1.62436594403313	6.23310296536722	6.8258704746495	4.18729292840228	4.23705207062102	3.26690349365367	4.99477573268521	4.22895060183621	5.41844541278359	7.21408808617213	7.26577147501487
maker-tulip_contig_327_pilon_pilon-augustus-gene-7.15-mRNA-1	0	0.199617945189673	0	59.3942024114089	70.0108108825388	45.7099677573668	24.6318085461915	19.8984828144059	19.783326803122	2.17846930042005	1.8205621427836	2.35391781701168	2.34364815849067	1.99791029307409	1.89189895345304	5.03141359758476	3.36657444021366	6.0875382628503
augustus_masked-tulip_contig_417_pilon_pilon-processed-gene-1.25-mRNA-1	107.442696083678	132.745933551133	114.129369080087	84.1807593232567	58.8452936297201	68.6408818150492	122.972438120759	75.9391078835489	105.962750411243	122.865668543691	132.718980208925	116.911251578247	188.770206220249	144.848496247871	170.716058505704	338.459322391375	267.402198394114	237.413992251162
maker-tulip_contig_473_pilon_pilon-augustus-gene-2.15-mRNA-1	5.14255639374868	2.79465123265542	4.5724907484009	55.8087256254183	62.7683132050348	57.4032153232048	7.09097518753998	6.49746377613252	15.7182596517956	1.59754415364137	1.27439349994852	1.09849498127212	1.20733389982853	2.49738786634261	0.890305389860254	4.83789768998534	5.77127046893771	2.94558303041143
augustus_masked-tulip_contig_581_pilon_pilon-processed-gene-3.2-mRNA-1	2.93860365357067	0.798471780758692	0.548698889808108	56.8999576907198	44.9638397478374	46.7729902633521	413.702420809899	363.045788491405	378.864258503625	104.566526420163	194.25398063501	182.820950454574	43.9611578819917	27.4712665297687	20.922176661716	54.1844541278359	53.8651910434186	48.7003061028024
maker-tulip_contig_3_pilon_pilon-augustus-gene-2.4-mRNA-1	0	0	0	4.83259914633511	0	4.40395038193899	1.67944149178579	2.23350317304556	1.35502238377548	0	0	0.156927854467445	6.74686591080649	6.9926860257593	8.23532485620735	40.0577928730787	38.9560756653295	33.7760187487178
maker-tulip_contig_837_pilon_pilon-augustus-gene-9.46-mRNA-1	0.367325456696334	0.199617945189673	0.182899629936036	21.9805316010726	23.8398881884507	17.9195222437518	8.39720745892893	23.5533061884804	12.4662059307344	1.16185029355736	0.36411242855672	1.09849498127212	1.49141246449407	2.49738786634261	4.34023877556874	6.19250904318124	2.40469602872404	4.90930505068572
augustus_masked-tulip_contig_102_pilon_pilon-processed-gene-0.22-mRNA-1	74.9343931660522	92.4231086228186	81.3903353215361	74.9832319157157	78.4603915062934	78.3599447269145	95.5415604215914	88.5279439498056	86.1794236081207	52.2832632100813	53.5973494835492	56.1801718993454	69.8833269077219	60.9362639387596	70.4454139726926	208.997180207367	201.03258800133	171.629304571973
maker-tulip_contig_89_pilon_pilon-augustus-gene-4.29-mRNA-1	0	0	0	0	0	0.455581073993689	24.4452039359931	41.8274230588531	22.493371570673	1.59754415364137	3.27701185701048	2.66777352594657	0	0	0	0	0	0
maker-tulip_contig_54_pilon_pilon-augustus-gene-2.25-mRNA-1	0	0	0	0.155890295043068	1.357968314532	5.01139181393058	49.8234309229783	84.670074832727	27.1004476755096	0	0	0	0	0	0	0	0	0
augustus_masked-tulip_contig_66_pilon_pilon-processed-gene-0.65-mRNA-1	7.71383459062302	8.98280753353528	5.12118963820901	0.935341770258408	1.20708294625067	1.82232429597476	1.49283688158736	2.84264040205798	0.813013430265289	1.74277544033604	0.36411242855672	1.09849498127212	1.42039282332768	1.99791029307409	2.1144753009181	0	0.480939205744809	1.57097761621943
maker-tulip_contig_441_pilon_pilon-augustus-gene-2.5-mRNA-1	0.918313641740835	0.998089725948365	2.0118959292964	10.1328691777994	15.2394221964147	17.7676618857539	12.1292996628973	16.0406136973272	5.69109401185703	1.30708158025203	2.91289942845376	4.08012421615358	1.91753031149237	0.998955146537043	1.89189895345304	4.45086587478652	2.40469602872404	1.96372202027429
maker-tulip_contig_806_pilon_pilon-augustus-gene-0.4-mRNA-1	0	0.399235890379346	0	2.65013501573216	2.715936629064	1.06302250598527	16.0479964770642	9.94924140720293	19.5123223263669	21.9299242908952	30.5854439987645	23.2253224611819	3.97709990531751	3.99582058614817	5.45312051289406	19.158074852342	8.65690570340656	17.0843815763863
maker-tulip_contig_448_pilon_pilon-augustus-gene-0.33-mRNA-1	0.367325456696334	0.199617945189673	1.82899629936036	0.467670885129204	0	0.303720715995793	0	0.406091486008283	0	6.09971404117615	4.73346157123736	4.23705207062102	2.13058923499152	1.99791029307409	2.33705164838317	5.22492950518417	9.13784490915137	13.1569375358377
maker-tulip_contig_479_pilon_pilon-augustus-gene-3.20-mRNA-1	0.279167347089214	0	0	0	0	3.35915111891347	122.8231544326	33.7035628812574	83.2254748114901	2.70565887112171	4.92280003408686	2.8811954080223	0	0	0.111288173732532	0	0	0.298485747081692
maker-tulip_contig_402_pilon_pilon-augustus-gene-2.43-mRNA-1	47.7523093705234	43.317094106159	41.3353163655442	14.4977974390053	18.2571295620414	16.7046393797686	16.0479964770642	19.8984828144059	17.0732820355711	16.5563666831924	18.9338462849494	17.5759197003539	56.5316343684417	46.950891887241	56.8682567773237	12.9655658091607	12.504419349365	10.0149823033989
maker-tulip_contig_125_pilon_pilon-augustus-gene-0.307-mRNA-1	76.4036949928375	66.8720116385405	70.965056415182	187.224244346725	185.58900298604	190.736609645358	160.293360160443	191.269089909901	149.594471168813	35.5816652401942	30.9495564273212	34.9949115462403	143.743753720761	100.894469800241	94.2610831514544	345.812926880152	166.885904393449	274.724710636373
maker-tulip_contig_381_pilon_pilon-augustus-gene-0.88-mRNA-1	29.9370247207512	39.9235890379346	25.7888478209811	40.3755864161546	35.9107176509574	37.6613687834783	43.478874176232	27.6142210485632	39.295649129489	17.8634482634444	15.1106657851039	22.4406831888447	14.2749478744432	17.9811926376668	16.9158024073448	13.7396294395584	10.099723320641	14.9242873540846
maker-tulip_contig_523_pilon_pilon-augustus-gene-0.76-mRNA-1	237.108582297484	281.261684772249	255.693682650578	1.87068354051682	1.65973905109467	1.21488286398317	3.73209220396841	10.5583786362154	9.21415220967328	31.6604204994381	29.311050498816	29.3455087854123	29.2600921605502	27.9707441030372	38.8395726326536	9.48227947237127	11.5425409378754	12.1750765257006
maker-tulip_contig_3_pilon_pilon-augustus-gene-1.33-mRNA-1	0	0.199617945189673	0	0	0	0	0	0	0	0	0	0.156927854467445	0	0.499477573268521	0.222576347465064	7.54712039637714	14.4281761723443	7.26577147501487
maker-tulip_contig_519_pilon_pilon-augustus-gene-0.17-mRNA-1	0	0	0	0	0.150885368281334	0	0	0.609137229012424	0	0	0	0	0	0	0	3.87031815198828	1.92375682297924	4.51656064663087
maker-tulip_contig_867_pilon_pilon-augustus-gene-3.33-mRNA-1	110.564962465597	122.16618245608	86.6944245896811	59.550092706452	66.8422181486307	61.9590260631417	70.9097518753998	73.299513224495	85.3664101778554	119.525348949714	154.383669708049	143.275131128778	292.103784117338	279.207963457103	316.392277921588	87.2756743273356	106.287564469603	102.113545054263
augustus_masked-tulip_contig_473_pilon_pilon-processed-gene-1.11-mRNA-1	0.550988185044501	0.399235890379346	0.548698889808108	0.311780590086136	0.603541473125334	0.303720715995793	0.559813830595262	0	0	2.32370058711472	3.09495564273212	3.13855708934891	1.84651067032599	0.998955146537043	2.4483398221157	2.51570679879238	0.480939205744809	2.35646642432915
maker-tulip_contig_321_pilon_pilon-augustus-gene-0.2-mRNA-1	55.6498066894946	53.8968452012117	59.4423797292117	25.5660083870632	29.875302919704	31.8906751795582	37.3209220396841	21.3198030154348	49.0518102926724	22.3656181509792	21.3005770705681	26.5208074049983	33.3792313482005	32.4660422624539	38.0605554165259	10.6433749179678	13.4662977608547	12.5678209297555
augustus_masked-tulip_contig_43_pilon_pilon-processed-gene-6.114-mRNA-1	35.6305692995444	34.7335224630031	44.4446100744568	10.1328691777994	10.411090411412	10.9339457758485	5.97134752634946	6.49746377613252	5.69109401185703	19.0252985570018	22.0288019276816	19.9298375173656	29.402131442883	29.4691768228428	33.9428929884222	6.57954085838007	9.13784490915137	6.28391046487773
maker-tulip_contig_547_pilon_pilon-augustus-gene-6.39-mRNA-1	0	1.39732561632771	0.182899629936036	22.2923121911587	24.5943150298574	25.8162608596424	3.35888298357157	2.4365489160497	3.79406267457135	1.01661900686269	0.54616864283508	0.313855708934891	0.710196411663841	0.499477573268521	0.556440868662659	6.57954085838007	5.77127046893771	5.10567725271315
maker-tulip_contig_907_pilon_pilon-augustus-gene-2.21-mRNA-1	19.6519119332539	23.7545354775711	19.0215615133478	5.14437973642124	3.77213420703334	6.98557646790323	7.83739362833367	4.67005208909525	4.60707610483664	15.394516389635	10.3772042138665	10.2003105403839	8.4513372987997	7.99164117229634	7.3450194663471	16.2553362383508	12.0234801436202	8.8367490912343
augustus_masked-tulip_contig_204_pilon_pilon-processed-gene-1.46-mRNA-1	1.6529645551335	0.399235890379346	3.47509296878469	15.5890295043068	10.5619757796933	12.6044097138254	30.9763652929378	23.3502604454763	26.5584387219995	72.1799494872511	57.7118199262401	69.6759673835457	4.97137488164688	4.49529815941669	6.56600225021937	12.5785339939619	17.3138114068131	12.7641931317829
maker-tulip_contig_560_pilon_pilon-augustus-gene-3.19-mRNA-1	0	0	0	4.52081855624897	7.24249767750401	5.01139181393058	0.746418440793682	1.01522871502071	0.271004476755096	0.29046257338934	0	0	0.0710196411663841	0.499477573268521	0.111288173732532	0.774063630397655	1.44281761723443	0.392744404054858
maker-tulip_contig_29_pilon_pilon-augustus-gene-1.34-mRNA-1	0	0.199617945189673	0	3.8972573760767	0.905312209688001	3.49278823395162	18.1006471892468	11.3705616082319	10.2981701166937	0.435693860084011	0.54616864283508	0.156927854467445	1.27835354099491	0.998955146537043	1.33545808479038	2.12867498359355	2.40469602872404	1.76734981824686
augustus_masked-tulip_contig_80_pilon_pilon-processed-gene-0.30-mRNA-1	167.684070981877	59.6857656117122	128.761339474969	29.9309366482691	44.6620690112747	36.9020669934888	61.9527305858756	67.0050951913666	49.3228147694276	71.3085617670831	79.7406218539217	79.0916386515924	62.8523824322499	46.4514143139725	57.3134094722539	43.5410792098681	47.1320421629913	46.5402118805007
augustus_masked-tulip_contig_784_pilon_pilon-processed-gene-0.34-mRNA-1	7.71383459062302	15.3705817796048	1.09739777961622	7.48273416206726	2.41416589250134	2.88534680196003	0.933023050992103	0.203045743004141	0.813013430265289	41.6813792813703	15.2927219993822	25.1084567147913	18.9622441914245	9.4900738921019	9.23691841980014	5.80547722798241	9.13784490915137	4.90930505068572
maker-tulip_contig_837_pilon_pilon-augustus-gene-7.25-mRNA-1	0	0	0	1.40301265538761	0.452656104844001	0.607441431991585	5.59813830595262	3.85786911707869	7.3171208723876	5.22832632100813	6.55402371402096	8.00332057783971	0.923255335162993	0	0.445152694930127	2.12867498359355	0.480939205744809	1.57097761621943
maker-tulip_contig_44_pilon_pilon-augustus-gene-6.22-mRNA-1	0.367325456696334	0	0	4.20903796616284	3.92301957531467	4.85953145593268	2.98567376317473	6.70050951913667	4.87808058159174	8.42341462829087	7.10019235685604	7.21868130550249	3.69302134065197	4.49529815941669	4.11766242810368	9.67579537997069	10.099723320641	13.1569375358377
maker-tulip_contig_101_pilon_pilon-augustus-gene-0.11-mRNA-1	56.3844576028873	42.3190043802107	48.2855023031135	20.2657383555988	20.0677539814174	22.019751909695	64.751799738852	97.2589108989837	73.7132176773862	24.9797813114833	45.6961097838684	42.8413042696126	27.0584832843923	15.9832823445927	20.6996003142509	75.277688056172	68.7743064215077	69.9085039217647
augustus_masked-tulip_contig_560_pilon_pilon-processed-gene-3.4-mRNA-1	0	0	0	9.66519829267022	10.863746516256	11.3895268498422	16.0479964770642	9.54314992119465	11.6531925004691	0.580925146778681	0.36411242855672	0.784639272337227	1.63345174682683	0.499477573268521	1.66932260598798	5.41844541278359	3.84751364595847	6.0875382628503
maker-tulip_contig_441_pilon_pilon-augustus-gene-5.61-mRNA-1	97.1575832961804	85.2368625959904	92.1814134877622	50.0407847088248	50.6974837425281	43.7357831033941	14.3685549852784	15.0253849823065	16.2602686053058	24.5440874513993	36.2291866413937	28.4039416586076	72.8661518367101	76.4200687100838	86.6934873376422	11.0304067331666	12.0234801436202	10.996843313536
maker-tulip_contig_361_pilon_pilon-augustus-gene-1.34-mRNA-1	40.9567884216412	29.7430738332613	40.2379185859279	58.1470800510644	50.6974837425281	60.136701767167	67.9240781122251	52.5888474380726	62.8730386071824	77.8439696683432	78.4662283539732	75.3253701443738	89.8398460754758	62.4346966585652	78.4581624814349	188.09746218663	150.533971398125	166.327255117232
maker-tulip_contig_843_pilon_pilon-augustus-gene-9.64-mRNA-1	0.183662728348167	0.798471780758692	0	2.18246413060295	1.50885368281334	4.1002296659432	0.559813830595262	0.203045743004141	0.813013430265289	1.16185029355736	0.9102810713918	0.627711417869781	4.19015882881666	4.49529815941669	3.44993338570848	15.2877567003537	5.77127046893771	12.371448727728
maker-tulip_contig_247_pilon_pilon-augustus-gene-2.134-mRNA-1	11.3870891575864	9.18242547872496	10.059479646482	142.483729669364	82.0816403450454	141.685714012037	162.159406262428	126.294452148576	138.483287621854	169.630142859375	128.531687280522	128.837768517773	153.970582048721	138.35528779538	144.674625852291	414.704589985544	410.722081706067	477.969939734762
augustus_masked-tulip_contig_339_pilon_pilon-processed-gene-0.16-mRNA-1	0.918313641740835	2.99426917784509	0.548698889808108	0	0	0	0	0	0	0.29046257338934	0.18205621427836	0	19.5304013207556	16.4827599178612	15.5803443225544	0	0	0
maker-tulip_contig_531_pilon_pilon-augustus-gene-3.5-mRNA-1	128.747572572065	117.375351771528	113.946469450151	2.33835442564602	3.47036347047067	3.18906751795582	11.7560904425005	9.54314992119465	18.4283044193466	94.5455676382303	165.853211207586	173.091423477592	95.8765155746185	72.9237256972041	77.6791452653072	73.5360448877772	85.1262394168312	135.496819398926
maker-tulip_contig_422_pilon_pilon-augustus-gene-0.15-mRNA-1	64.4656176502066	51.301811913746	49.7486993426018	0.155890295043068	0	0	0	0	0	0	0	0	27.2715422078915	21.9770132238149	40.0637425437114	0	0	0
augustus_masked-tulip_contig_597_pilon_pilon-processed-gene-5.59-mRNA-1	0.183662728348167	0.399235890379346	0	0.469229788079635	0.150885368281334	0.303720715995793	0.375075266498825	0.812182972016566	0.813013430265289	0.435693860084011	0.18205621427836	0	8.7460688096402	8.99059631883338	7.6922385683926	1.17077124097645	0.961878411489618	0.589116606082287
maker-tulip_contig_508_pilon_pilon-augustus-gene-1.2-mRNA-1	48.6706230122643	81.0448857470072	52.1263945317703	11.8476624232732	14.484995355008	12.9081304298212	6.71776596714314	8.52792120617394	12.4662059307344	20.7680739973378	20.208239784898	20.5575489352353	73.7894071718731	61.9352190852966	80.572637782353	35.6069269982921	58.1936438951219	77.7633920028618
maker-tulip_contig_441_pilon_pilon-augustus-gene-1.182-mRNA-1	6.97918367723035	2.99426917784509	2.56059481910451	0	0.150885368281334	0	2.79906915297631	0.406091486008283	22.7643760474281	2.17846930042005	2.00261835706196	0.784639272337227	0.0710196411663841	0	0	0.387031815198828	0	0
augustus_masked-tulip_contig_702_pilon_pilon-processed-gene-0.11-mRNA-1	21.4885392167355	12.5759305469494	19.7531600330919	19.9539577655127	20.36952471798	20.1974276137202	26.3112500379773	27.6142210485632	21.9513626171628	21.3489991441165	19.6620711420629	21.9698996254423	18.6071459855926	15.9832823445927	21.5899057041112	15.8683044231519	18.2756898183027	21.4045700209898
maker-tulip_contig_362_pilon_pilon-augustus-gene-4.13-mRNA-1	0	0.998089725948365	0	0	0.301770736562667	0	0	0	0.271004476755096	0.29046257338934	0	0.156927854467445	1.3493731821613	0	1.66932260598798	5.99899313558183	12.9853585551098	5.10567725271315
maker-tulip_contig_320_pilon_pilon-augustus-gene-0.10-mRNA-1	112.21792702073	83.041065198904	103.521190543796	33.8281940243458	39.9846225945534	35.231603055512	56.7278015003199	53.8071218960975	57.7239535488355	31.3699579260488	33.4983434272183	34.0533444194356	39.7709990531751	45.4524591674354	44.8491340142103	24.9635520803244	40.398893282564	32.9905299406081
maker-tulip_contig_934_pilon_pilon-augustus-gene-4.18-mRNA-1	16.1623200946387	22.9560636968124	13.5345726152667	47.0788691030065	49.4904007962774	47.9878731273352	98.9004434051629	95.2284534689423	90.7864997129573	26.2868628917353	44.7858287124766	31.699426602424	36.2200169948559	36.4618628486021	46.6297447939308	85.7275470665403	109.654138909816	138.24603022731
maker-tulip_contig_109_pilon_pilon-augustus-gene-0.7-mRNA-1	35.8142320278926	11.1786049306217	19.9360596630279	28.3720336978384	27.0084809223587	41.002296659432	68.4838919428204	40.20305711482	50.9488416299581	32.3865769329115	40.4164795697959	46.6075727768313	33.095152783535	24.4744010901575	24.0382455262269	56.3131291114294	44.2464069285224	47.3257006886104
augustus_masked-tulip_contig_768_pilon_pilon-processed-gene-0.8-mRNA-1	6.24453276383768	3.39350506822444	6.5843866776973	6.70328268685192	2.56505126078267	4.1002296659432	8.77041667932577	8.12182972016566	13.2792193609997	28.61056347885	23.8493640704652	31.2286430390216	11.7182407924534	15.4838047713242	11.6852582419158	10.4498590103683	16.8328722010683	7.85488808109716
maker-tulip_contig_531_pilon_pilon-augustus-gene-3.31-mRNA-1	40.2221375082486	18.3648509574499	21.5821563324523	72.8007677851128	61.8630009953467	67.7297196670618	102.632535609131	87.3096694917808	70.19015947957	37.1792093938356	33.862455855775	38.2903964900567	113.986524072046	102.892380093315	96.26427027864	190.806684893022	169.771539627918	268.04805576744
maker-tulip_contig_527_pilon_pilon-augustus-gene-1.33-mRNA-1	20.3865628466465	13.9732561632771	16.2780670643072	9.50930799762715	4.07390494359601	4.40395038193899	9.51683512011945	8.12182972016566	11.111183546959	16.5563666831924	18.7517900706711	20.8714046441702	18.8202049090918	20.4785805040094	18.4738368396003	6.9665726735789	9.13784490915137	10.4077267074537
maker-tulip_contig_837_pilon_pilon-augustus-gene-5.15-mRNA-1	12.121740070979	6.78701013644888	6.03568778788919	2.96191560581829	2.56505126078267	4.55581073993689	4.47851064476209	2.84264040205798	3.25205372106116	13.3612783759097	8.73869828536128	9.10181555911183	5.96564985797626	7.49216359902782	5.78698503409165	6.57954085838007	7.69502729191694	9.22949349528916
maker-tulip_contig_819_pilon_pilon-augustus-gene-0.50-mRNA-1	34.3449302011072	28.3457482169336	31.4587363489982	10.1328691777994	8.14780988719201	7.89673861589061	5.78474291615104	6.09137229012424	2.98104924430606	11.4732716488789	10.5592604281449	9.25874341357927	13.2096532569474	9.4900738921019	16.9158024073448	13.7396294395584	13.9472369665995	11.9787043236732
maker-tulip_contig_39_pilon_pilon-augustus-gene-1.131-mRNA-1	2.02029001182984	9.78127931429398	2.0118959292964	1.24712236034454	0.452656104844001	0.607441431991585	0.186604610198421	0	0.813013430265289	0.871387720168021	0.54616864283508	0.470783563402336	0.426117846998304	0	0.556440868662659	20.8997180207367	19.7185074355372	10.996843313536
maker-tulip_contig_781_pilon_pilon-augustus-gene-2.4-mRNA-1	58.2541441774716	35.5319942437618	57.4304837999153	20.4216286506419	23.8398881884507	16.8564997377665	29.4835284113505	32.2842731376585	35.2305819781625	6.09971404117615	9.64897935675308	7.21868130550249	12.9965943334483	19.4796253574723	18.1399723184027	5.41844541278359	6.73314888042733	5.89116606082287
maker-tulip_contig_626_pilon_pilon-augustus-gene-1.46-mRNA-1	0	0	0	0	0.150885368281334	0	0	0	0	0.29046257338934	0.18205621427836	0.156927854467445	154.396699895719	227.152410771058	260.364246855945	0.387031815198828	0	0.196372202027429
maker-tulip_contig_443_pilon_pilon-augustus-gene-1.37-mRNA-1	100.279849678099	141.529123139478	117.421562418935	107.096632694588	122.066262939599	124.373633200277	117.560904425005	117.360439456394	108.401790702039	217.556467468616	201.536229206145	194.11975597623	230.742814149582	175.816105790519	195.422033074326	265.697341133995	206.803858470268	194.408480007155
augustus_masked-tulip_contig_515_pilon_pilon-processed-gene-7.61-mRNA-1	4.77523093705234	8.98280753353528	6.5843866776973	5.76794091659352	9.65666357000535	6.22627467791375	3.17227837337315	2.63959465905384	2.71004476755096	16.2659041098031	18.205621427836	14.5942904654724	9.3745926339627	9.4900738921019	9.1256302460676	4.2573499671871	6.25220967468252	2.55283862635658
augustus_masked-tulip_contig_208_pilon_pilon-processed-gene-1.12-mRNA-1	0	0.199617945189673	0	0	0	0.151860357997896	0	0	0	0.29046257338934	0	0.156927854467445	278.89413086039	341.642660115669	398.189085614999	0	5.2903312631929	0
maker-tulip_contig_221_pilon_pilon-augustus-gene-0.62-mRNA-1	345.836917479599	426.184312979952	296.114500866442	350.753163846903	317.764585600488	322.855121103528	223.365718407509	207.715795093237	198.375276984731	314.570966980656	290.197605559706	298.005995633679	276.195384496068	286.700127056131	323.180856519272	173.583769116674	164.481208364725	199.710529461895
maker-tulip_contig_79_pilon_pilon-augustus-gene-0.7-mRNA-1	565.13021512731	325.377250659167	408.231974017233	145.445645275182	174.27260036494	178.132199931532	343.912296595689	379.086402188732	300.814969198157	77.2630445215645	67.1787430687149	75.9530815622435	204.891664765018	173.318717924177	167.822565988658	33.671767922298	37.9941972538399	33.5796465466903
augustus_masked-tulip_contig_654_pilon_pilon-processed-gene-0.4-mRNA-1	0	0	0	23.2276539614171	22.180149137356	29.7646301675877	63.445567467463	20.10152855741	41.4636849435298	0.580925146778681	0.36411242855672	0.313855708934891	11.7892604336198	5.99373087922226	6.12084955528925	43.7345951174675	49.3491719014748	63.4282212548595
maker-tulip_contig_603_pilon_pilon-augustus-gene-0.12-mRNA-1	0	0.598853835569019	0	1.24712236034454	0.905312209688001	1.97418465397265	1.11962766119052	1.21827445802485	2.71004476755096	4.50216988753478	3.6411242855672	4.08012421615358	0.142039282332768	0.499477573268521	0.445152694930127	1.16109544559648	0	0.392744404054858
maker-tulip_contig_191_pilon_pilon-augustus-gene-0.256-mRNA-1	0	0	0	0	0	1.06302250598527	29.1942912655429	4.08324989181328	7.92417090031902	0	0	0	0	0	0.111288173732532	0	0	0
maker-tulip_contig_870_pilon_pilon-augustus-gene-2.4-mRNA-1	0	0	0	529.091661376173	992.825723291175	970.995129038549	584.632243751652	794.111900889197	334.690528792544	2.03323801372538	3.27701185701048	1.25542283573956	0.142039282332768	0	0	0	0	0.196372202027429
maker-tulip_contig_334_pilon_pilon-augustus-gene-4.25-mRNA-1	20.5702255749947	16.7679073959325	22.8624537420045	9.82108858771328	9.95843430656801	11.5413872078401	5.59813830595262	3.4517776310704	5.69109401185703	16.1206728231084	12.9259912137636	14.2804347565375	2.55670708198983	1.49843271980556	2.33705164838317	2.70922270639179	5.2903312631929	3.73107183852115
maker-tulip_contig_505_pilon_pilon-augustus-gene-2.53-mRNA-1	1.46930182678534	0.598853835569019	0.365799259872072	1.24712236034454	0.452656104844001	1.67046393797686	2.05265071218263	4.26396060308697	1.35502238377548	2.46893187380939	1.45644971422688	2.66777352594657	2.84078564665536	2.49738786634261	2.55962799584823	0.193515907599414	0.480939205744809	2.16009422230172
augustus_masked-tulip_contig_247_pilon_pilon-processed-gene-2.154-mRNA-1	0	0.600850015020916	0	4.17941881010465	1.80911556569319	2.53454937498489	15.3519612810241	11.4355362459932	14.1681140447564	2.21332480922677	4.48768568196158	5.66509554627478	0.487194738401395	0	0.38505708111456	2.25446032353317	2.84716009800927	0.465402118805007
maker-tulip_contig_168_pilon_pilon-augustus-gene-1.26-mRNA-1	569.721783336014	670.915913782491	699.95688376521	78.2569281116201	74.9900280358228	70.6150664690218	132.862482461275	131.776687209688	138.212283145099	275.648982146484	275.633108417437	321.074390240393	90.976160334138	82.9132771625745	70.111549451495	111.078130962064	99.0734763834306	86.2073966900413
maker-tulip_contig_698_pilon_pilon-augustus-gene-2.35-mRNA-1	106.157056985241	135.540584783788	112.11747315079	139.677704358589	129.00698988054	155.808727305842	175.408333586515	204.670108948175	163.144695006568	54.7521950838907	46.6063908552602	32.3271380202937	91.8283960281346	82.413799589306	98.6013219270231	131.9778489828	123.601375876416	183.804381097673
maker-tulip_contig_626_pilon_pilon-augustus-gene-0.22-mRNA-1	2.203952740178	2.1957973970864	0.548698889808108	0.623561180172272	0.452656104844001	0	0.186604610198421	0	0	0.29046257338934	0.36411242855672	0.156927854467445	0.35509820583192	0.499477573268521	0.556440868662659	21.2867498359355	25.4897779044749	21.4045700209898
augustus_masked-tulip_contig_872_pilon_pilon-processed-gene-0.18-mRNA-1	16.930030299134	12.1746984771182	10.7435242624428	9.91462276473912	9.89506245188985	11.5186081541404	6.81106827224235	7.74010372331787	9.07864997129573	5.30094196435546	6.1170887997529	6.27711417869781	5.80230468329358	4.29550713010928	6.45471407648684	16.0134413538515	19.7185074355372	21.7560762626189
maker-tulip_contig_474_pilon_pilon-augustus-gene-0.63-mRNA-1	38.0181847680706	29.9426917784509	36.7628256171433	119.879636888119	116.936160418033	104.783647018548	69.6035196040109	60.7106771582383	63.9570565142028	68.1134734598003	76.4636099969112	72.3437409094923	48.5064149166403	51.9456676199262	59.9843256418346	71.9879176269819	94.7450235317274	87.5820021042333
augustus_masked-tulip_contig_773_pilon_pilon-processed-gene-4.16-mRNA-1	2.203952740178	3.59312301341411	0.548698889808108	12.7830041935316	10.411090411412	8.80790076387799	10.2632535609131	5.8883265471201	11.3821880237141	18.8800672703071	24.0314202847435	28.5608695130751	16.6896156741003	8.99059631883338	11.7965464156484	14.3201771623566	17.3138114068131	15.7097761621943
augustus_masked-tulip_contig_610_pilon_pilon-processed-gene-3.5-mRNA-1	10.4687755158455	9.98089725948365	16.2780670643072	9.97697888275635	15.6920783012587	14.4267340098002	21.2729255626199	26.8020380765467	17.3442865123262	5.66402018109214	5.82579885690752	4.39397992508847	6.88890519313925	2.99686543961113	7.67888398754469	8.32118402677479	6.25220967468252	6.87302707096001
maker-tulip_contig_226_pilon_pilon-augustus-gene-0.48-mRNA-1	0	0	0	5.92383121163658	4.07390494359601	8.2004593318864	11.3828812221037	13.1979732952692	11.111183546959	0	0	0	32.5980152953703	25.4733562366946	20.8108884879834	0	0.480939205744809	0
maker-tulip_contig_828_pilon_pilon-augustus-gene-0.2-mRNA-1	1.28563909843717	0.598853835569019	0.914498149680181	1.87068354051682	2.26328052422	0.911162147987378	2.79906915297631	2.23350317304556	2.16803581404077	4.64740117422945	2.91289942845376	4.55090777955591	3.83506062298474	3.49634301287965	3.67250973317355	3.28977042919003	1.44281761723443	3.53469963649372
maker-tulip_contig_327_pilon_pilon-augustus-gene-0.10-mRNA-1	524.540752162365	483.873899139767	506.997774182692	105.070058859028	49.1886300597147	52.69554422527	64.9384043490504	170.558424123479	87.8054504686512	61.1423716984562	70.273698711447	91.6458670089881	72.8661518367101	76.9195462833523	58.4262912095792	139.331453471578	103.401929235134	80.5126028312459
maker-tulip_contig_407_pilon_pilon-augustus-gene-0.70-mRNA-1	0.183662728348167	0	0.182899629936036	38.8166834657239	43.1532153284614	43.887643461392	7.46418440793683	6.49746377613252	4.87808058159174	2.75939444719873	2.91289942845376	2.04006210807679	0.923255335162993	0.499477573268521	1.44674625852291	7.35360448877772	5.2903312631929	6.48028266690515
maker-tulip_contig_102_pilon_pilon-augustus-gene-0.53-mRNA-1	108.728335182115	67.2712475289198	90.1695175584658	1.40301265538761	2.41416589250134	2.42976572796634	1.30623227138894	1.42132020102899	2.43904029079587	1.16185029355736	1.45644971422688	1.41235069020701	2.69874636432259	0.998955146537043	2.1144753009181	2.32219089119297	2.88563523446885	1.57097761621943
maker-tulip_contig_236_pilon_pilon-augustus-gene-2.4-mRNA-1	0.367325456696334	0	0.182899629936036	94.00184791097	106.675955374903	87.1678454907925	10.4498581711116	10.7614243792195	15.7182596517956	2.9046257338934	3.45906807128884	5.02169134295825	3.1248642113209	2.49738786634261	3.78379790690608	9.09524765717245	8.17596649766175	4.51656064663087
maker-tulip_contig_307_pilon_pilon-augustus-gene-1.66-mRNA-1	526.928367630891	404.625574899467	467.85725337638	86.2073331588166	107.581267584591	100.227836278612	217.021161660763	230.4569183097	206.505411287383	82.781833415962	83.0176337109322	80.0332057783971	210.928334264161	205.784760186631	202.878340714405	40.4448246882775	46.6511029572465	39.2744404054858
maker-tulip_contig_598_pilon_pilon-augustus-gene-0.87-mRNA-1	257.49514514413	246.328544364056	248.560597083073	64.8503627379163	78.0077354014494	89.7494715767567	86.957748352464	100.101551301042	81.0303385497738	78.5701261018166	93.5768941390771	85.8395363936926	84.9394908349953	76.4200687100838	94.0385068039893	134.106523966394	111.096956527051	135.496819398926
maker-tulip_contig_318_pilon_pilon-augustus-gene-0.53-mRNA-1	924.007186319628	647.959850085679	729.769523444784	498.069492662602	545.752377073583	498.405694949096	529.957092963515	474.11180991467	515.450514788193	842.196231542393	798.680612039166	914.575535836271	691.731304960581	676.792111778846	613.086549092517	524.621625502011	490.07705065396	530.990434282168
maker-tulip_contig_407_pilon_pilon-augustus-gene-7.101-mRNA-1	191.560225667138	174.066848205395	159.67137693416	31.6457298937428	34.5527493364254	37.5095084254804	39.7467819722636	38.3756454277827	37.1276133154482	64.0469974323496	65.722293354488	60.1033682610316	68.1078358785623	58.438876072417	74.6743645745288	47.7984291770552	42.3226501055432	34.7578797588549
maker-tulip_contig_837_pilon_pilon-augustus-gene-8.59-mRNA-1	0	0	0	57.6794091659352	78.9130476111374	63.9332107171144	8.02399823853209	6.90355526214081	7.04611639563251	0.726156433473351	2.00261835706196	2.19698996254423	1.20733389982853	1.49843271980556	1.11288173732532	3.48328633678945	7.69502729191694	3.73107183852115
maker-tulip_contig_125_pilon_pilon-augustus-gene-0.326-mRNA-1	0	0	0	15.4331392092637	30.327959024548	13.6674322198107	28.1772961399615	39.5939198858076	10.5691745934488	0.871387720168021	0.9102810713918	0.156927854467445	0	0	0	0.387031815198828	0	0
maker-tulip_contig_429_pilon_pilon-augustus-gene-1.4-mRNA-1	0.550988185044501	0	0.182899629936036	4.20903796616284	5.13010252156534	5.31511252992637	5.4115336957542	1.62436594403313	8.13013430265289	2.9046257338934	3.09495564273212	2.98162923488146	2.69874636432259	2.49738786634261	4.11766242810368	1.93515907599414	6.25220967468252	6.0875382628503
maker-tulip_contig_270_pilon_pilon-augustus-gene-2.80-mRNA-1	0	0.598853835569019	0.365799259872072	14.3419071439623	11.6181733576627	9.71906291186537	0.933023050992103	0.406091486008283	1.08401790702039	0.871387720168021	0.54616864283508	1.09849498127212	0.497137488164689	0.499477573268521	0.111288173732532	2.12867498359355	2.40469602872404	2.94558303041143
maker-tulip_contig_555_pilon_pilon-augustus-gene-2.19-mRNA-1	1.6529645551335	1.79656150670706	1.09739777961622	1.24712236034454	1.96150978765734	1.06302250598527	0.559813830595262	0.203045743004141	0.271004476755096	1.74277544033604	0.54616864283508	0.784639272337227	0.426117846998304	0	0.667729042395191	6.19250904318124	10.099723320641	8.24763248515201
maker-tulip_contig_199_pilon_pilon-augustus-gene-1.0-mRNA-1	0.367325456696334	1.19770767113804	0.365799259872072	4.67670885129204	4.52656104844001	3.79650894994741	1.67944149178579	2.4365489160497	1.35502238377548	6.09971404117615	5.64374264262916	4.70783563402336	3.05384457015451	1.49843271980556	2.22576347465064	4.83789768998534	4.32845285170328	2.55283862635658
augustus_masked-tulip_contig_196_pilon_pilon-processed-gene-3.4-mRNA-1	100.830837863144	35.9312301341411	92.1814134877622	122.841552493938	179.100932149943	118.147358522363	11.1962766119052	11.9796988372443	15.1762506982854	13.7969722359937	17.4773965707226	19.6159818084307	19.9565191677539	18.4806702109353	17.360955102275	0.387031815198828	0	0.196372202027429
maker-tulip_contig_711_pilon_pilon-augustus-gene-2.65-mRNA-1	6.97918367723035	7.78509986239725	6.5843866776973	474.06238722597	331.042498009246	479.271289841361	727.011561333047	845.685519612249	716.80684101723	51.7023380633026	64.8120122830962	51.786191974257	27.6266404137234	23.4754459436205	27.0430262170052	83.0183243601485	69.2552456272525	68.9266429116276
maker-tulip_contig_687_pilon_pilon-augustus-gene-0.61-mRNA-1	2842.54804664458	3091.68273509766	2813.72790693598	1043.06196413317	1104.1791250828	1121.94432488846	1645.29284811947	2070.86353289924	1433.88468651122	852.507652897714	770.279842611742	656.586143091791	422.850943504651	408.073177360382	461.066903773879	449.537453353438	429.959649935859	401.973897550147
maker-tulip_contig_468_pilon_pilon-augustus-gene-3.72-mRNA-1	28.1297834738053	11.8553097648147	16.0348105564923	15.7402430904986	17.9825181917693	18.1306081413688	15.0776525040324	26.0487383700013	24.3904029079587	13.6982149610413	15.9954589864967	17.7014619839278	12.4618164354654	14.7295936356887	14.2025967317457	24.1720720182428	17.9630793345686	22.2234421034441
maker-tulip_contig_59_pilon_pilon-augustus-gene-1.48-mRNA-1	83.9338668551123	89.8280753353528	81.7561345814081	70.6183036545098	113.314911579281	95.6720255386747	84.9050976402814	122.639628774501	71.0031729098353	27.8844070453767	30.7675002130429	26.0500238415959	49.926807739968	47.4503694605095	52.3054416542899	46.2503019162599	33.6657444021366	40.2563014156229
maker-tulip_contig_47_pilon_pilon-augustus-gene-0.50-mRNA-1	96.4229323827877	161.490917658445	65.660967147037	97.4314344019175	70.9161230922268	100.531556994607	39.3735727518668	43.045697516878	36.0435954084278	11.1828090754896	12.0157101423718	7.21868130550249	108.8020902669	107.887155826001	139.77794620806	28.059806601915	26.9325955217093	24.5465252534286
maker-tulip_contig_334_pilon_pilon-augustus-gene-4.43-mRNA-1	6.79552094888218	2.79465123265542	5.66988852801712	13.71834596379	17.5027027206347	16.7046393797686	22.5791578340089	29.2385869925964	23.8483939544485	15.8302102497191	12.1977663566501	11.4557333761235	11.3631425866214	9.98955146537043	10.5723765045905	4.64438178238593	5.77127046893771	6.67665486893258
maker-tulip_contig_39_pilon_pilon-augustus-gene-1.71-mRNA-1	147.664833591926	119.171913278235	216.370262214331	14.1860168489192	8.90223672859868	8.95976112187588	108.977092355878	78.984794028611	104.607728027467	828.399259306399	890.436944035459	771.143476853026	12.0733389982853	4.99477573268521	6.34342590275431	143.008255715967	125.525132699395	90.5275851346447
maker-tulip_contig_196_pilon_pilon-augustus-gene-5.56-mRNA-1	378.896208582269	153.905435741238	281.848329731432	315.366066872127	304.184902455168	346.697197309197	463.899060953274	534.822487072908	505.965358101765	16.5563666831924	5.64374264262916	11.9265169395258	95.3793780864538	95.8996940675561	102.385119833929	25.5440998031226	15.8709937895787	20.61908121288
augustus_masked-tulip_contig_149_pilon_pilon-processed-gene-0.38-mRNA-1	77.5056713629265	100.208208485216	75.903346423455	25.254227796977	30.1770736562667	27.4867247976192	29.296923801152	29.6446784786046	36.3145998851829	38.1958284006983	43.8755476410848	36.2503343819799	64.4148145379103	55.4420106328059	67.5519214556468	33.0912201994998	51.9414342204394	49.8785393149669
augustus_masked-tulip_contig_773_pilon_pilon-processed-gene-0.4-mRNA-1	0.367325456696334	0.199617945189673	0	43.0257214318868	57.3364399469067	49.5064767073142	45.3449202782162	64.7715920183211	34.1465640711422	1.88800672703071	1.63850592850524	1.41235069020701	5.53953201097796	2.99686543961113	5.89827320782418	14.513693069956	13.4662977608547	12.1750765257006
maker-tulip_contig_799_pilon_pilon-augustus-gene-0.69-mRNA-1	0.918313641740835	8.98280753353528	1.28029740955225	179.520145965696	165.672134372904	190.888470003356	342.792668934499	287.30972635086	390.246446527339	8.71387720168021	13.654216070877	12.5542283573956	83.945215858666	54.9425330595373	46.5184566201983	149.200764759148	105.806625263858	133.336725176624
augustus_masked-tulip_contig_555_pilon_pilon-processed-gene-2.97-mRNA-1	0	0.363304660245205	0.596252793591478	0.332046328441735	1.4032339250164	0.475322920533416	0	0	0	0.238179310179259	0.333162872129399	1.77642331257148	3.38692668722486	5.92380401896466	4.14214582632483	0	0	1.65934510713177
maker-tulip_contig_507_pilon_pilon-augustus-gene-0.49-mRNA-1	134.992105335903	143.525302591375	128.395540215097	68.9035104090361	68.5019571997254	70.7669268270197	83.0390515382972	88.1218524637974	83.7403833173248	73.7774936408925	89.0254887821181	85.5256806847577	65.0539913084078	59.437831218954	60.7633428579623	76.6322994093679	88.0118746513	96.0260067914127
maker-tulip_contig_586_pilon_pilon-augustus-gene-0.0-mRNA-1	2.203952740178	0.199617945189673	0.914498149680181	0	0	0	0	0	0	0	0.54616864283508	0	0.994274976329377	1.49843271980556	1.33545808479038	12.1915021787631	12.9853585551098	7.65851587906973
maker-tulip_contig_703_pilon_pilon-augustus-gene-0.0-mRNA-1	52.3438775792276	37.5281736956585	47.5539037833694	25.8777889771493	26.254054080952	26.1199815756382	17.5408333586515	12.994927552265	14.9052462215303	40.8099915612023	36.0471304271153	42.0566649972753	29.3311118017166	24.9738786634261	27.3768907382028	14.9007248851549	12.0234801436202	12.9605653338103
maker-tulip_contig_800_pilon_pilon-augustus-gene-1.67-mRNA-1	132.420827139028	71.2636064327133	136.808923192155	522.700159279407	515.424418049035	544.571243780456	930.037377228928	671.878363600704	790.249054217861	181.248645794948	162.940311779132	181.408599764367	348.493379203447	305.680274840335	308.713393934043	424.186869457915	370.804127629248	487.592177634106
maker-tulip_contig_278_pilon_pilon-augustus-gene-0.73-mRNA-1	0	0	0	8.41807593232567	5.73364399469067	17.0083600957644	142.006108360998	150.253849823065	135.231233900793	1.01661900686269	1.09233728567016	0.470783563402336	7.95419981063502	8.49111874556486	4.78539147049887	23.0283930043302	20.199446641282	21.2081978189623
augustus_masked-tulip_contig_248_pilon_pilon-processed-gene-0.5-mRNA-1	7.89749731897118	3.39350506822444	7.86468408724955	11.8476624232732	4.67744641672134	7.89673861589061	14.3685549852784	9.54314992119465	10.5691745934488	23.6726997312312	18.0235652135576	21.0283324986377	9.16153371046354	9.98955146537043	7.3450194663471	10.8368908255672	13.9472369665995	14.9242873540846
augustus_masked-tulip_contig_90_pilon_pilon-processed-gene-0.6-mRNA-1	9.55046187410469	2.79465123265542	3.29219333884865	39.5961349409393	36.9669152289267	36.4464859194951	32.2825975643268	33.5025475956833	29.2684834895504	39.5029099809503	31.4957250701563	37.9765407811218	25.7801297433974	15.9832823445927	15.5803443225544	47.6049132694558	40.8798324883088	46.3438396784732
maker-tulip_contig_530_pilon_pilon-augustus-gene-0.48-mRNA-1	163.827153686565	136.339056564547	157.476581374927	29.4632657631399	37.117800597208	30.827652673573	39.5601773620652	56.8528080411596	49.0518102926724	73.1965684941138	67.9069679258283	71.2452459282202	40.9783329530036	41.9561161545558	38.3944199377235	30.7690293083068	35.5895012251159	34.1687631527726
maker-tulip_contig_815_pilon_pilon-augustus-gene-0.2-mRNA-1	0.550988185044501	0.798471780758692	1.28029740955225	24.3188860267186	24.443429661576	28.7016076616024	43.478874176232	39.3908741428034	41.7346894202849	38.3410596873929	35.6830179985586	39.0750357623939	5.96564985797626	2.49738786634261	7.67888398754469	20.7062021131373	16.8328722010683	17.869870384496
maker-tulip_contig_187_pilon_pilon-augustus-gene-1.90-mRNA-1	116.074844316042	67.8701013644888	87.2431234794892	38.972573760767	33.6474371267374	40.5467155854383	17.72743796885	24.7715806465052	20.3253357566322	17.1372918299711	22.5749705705167	17.262063991419	52.5545344631242	47.4503694605095	46.4071684464657	49.1530405302511	56.7508262778875	54.3950999615978
augustus_masked-tulip_contig_628_pilon_pilon-processed-gene-0.58-mRNA-1	0	0	0.365799259872072	0	3.17161044127363	10.900536497089	68.3663310383954	92.7350517448515	25.5150714864923	0	0	0	0.781216052830225	0	0	0.267051952487191	0	3.60146618518305
maker-tulip_contig_236_pilon_pilon-augustus-gene-0.47-mRNA-1	195.784468419146	236.746882994952	234.294425948062	14.8095780290915	68.5019571997254	23.8420762056697	64.751799738852	79.3908855146193	71.2741773865904	92.6575609111996	85.7484769251076	91.0181555911183	125.065588094002	105.389767959658	127.313670750016	22.447845281532	37.5132580480951	28.6703414960046
maker-tulip_contig_523_pilon_pilon-augustus-gene-0.110-mRNA-1	12.8563909843717	10.7793690402423	16.6438663241793	59.2383121163658	53.8660764764361	68.9446025310449	66.8044504510346	81.6243886876648	63.4150475606926	27.5939444719873	29.8572191416511	33.7394887105007	43.1089221879951	34.463952555528	40.7314715861066	44.7021746554646	49.5367381917153	46.3438396784732
maker-tulip_contig_400_pilon_pilon-augustus-gene-0.6-mRNA-1	169.888023722055	170.87296108236	167.718960651345	67.3446074586054	74.6882572992601	71.0706475430155	74.082030248773	75.3299706545365	89.973486282692	92.0766357644209	96.6718497818092	97.9229811876859	75.4228589186999	72.9237256972041	81.1290786510157	72.7619812573796	113.501652555775	84.243674669767
maker-tulip_contig_75_pilon_pilon-augustus-gene-0.27-mRNA-1	94.7699678276542	87.2330420478871	91.8156142278901	48.3259914633511	49.1886300597147	48.7471749173247	44.4118972272241	45.888337918936	49.8648237229377	51.5571067766079	61.8991128546424	51.6292641197895	45.3815507053194	37.9602955684076	46.7410329676633	78.567458485362	63.00303595257	68.3375263055453
maker-tulip_contig_474_pilon_pilon-augustus-gene-0.0-mRNA-1	418.383695177125	239.341916282418	425.42453923122	306.636210349715	330.43895653612	326.196048979481	610.943493789629	623.959568251727	598.106880198498	264.3209417843	252.329912989807	261.284877688296	214.266257398981	197.293641441066	208.554037574765	73.5360448877772	105.325686058113	88.7602353163979
maker-tulip_contig_773_pilon_pilon-augustus-gene-2.42-mRNA-1	0.550988185044501	0	0	2.02657383555988	0	0.607441431991585	0.373209220396841	0.406091486008283	0	0.14523128669467	0	0.156927854467445	0.710196411663841	0.998955146537043	1.66932260598798	6.38602495078066	4.32845285170328	6.0875382628503
maker-tulip_contig_711_pilon_pilon-augustus-gene-0.25-mRNA-1	132.420827139028	144.523392317323	151.989592476846	35.0753163846903	31.9876980756427	36.2946255614972	39.933386582462	47.3096581199649	36.3145998851829	52.5737257834706	47.516671926652	39.8596750347311	39.3448812061768	38.9592507149447	35.0557747257475	38.8966974274822	33.6657444021366	31.0268079203338
maker-tulip_contig_490_pilon_pilon-augustus-gene-1.47-mRNA-1	0	0	0	7.7945147521534	5.73364399469067	4.85953145593268	35.8280851580968	25.5837636185218	40.9216759900196	1.4523128669467	1.27439349994852	0.941567126804672	0.0710196411663841	0	0	0	0	0
augustus_masked-tulip_contig_818_pilon_pilon-processed-gene-0.22-mRNA-1	11.5707518859345	4.93854796399251	3.88113014724269	20.925154303631	12.4073038337741	14.9081313446535	11.6870467367271	7.01319996336304	8.11116398928004	15.1055061291126	17.5556807428623	13.6809703524719	8.40730512127655	11.1982871926802	9.34486794832069	25.3351026229153	16.3182672509214	33.6955061458865
maker-tulip_contig_667_pilon_pilon-augustus-gene-0.64-mRNA-1	0.367325456696334	0.998089725948365	2.0118959292964	22.1364218961157	25.348741871264	27.1830040816234	35.8280851580968	42.2335145448614	37.1276133154482	1.01661900686269	0.9102810713918	0.627711417869781	2.76976600548898	2.99686543961113	2.78220434331329	10.4498590103683	10.5806625263858	9.22949349528916
maker-tulip_contig_27_pilon_pilon-augustus-gene-0.8-mRNA-1	0	0	0	0.311780590086136	0.905312209688001	1.36674322198107	2.52662642208661	1.01522871502071	4.33607162808154	0.29046257338934	0	0.156927854467445	2.05956959382514	5.49425330595373	1.22416991105785	4.45086587478652	2.88563523446885	9.03312129326173
maker-tulip_contig_687_pilon_pilon-augustus-gene-0.15-mRNA-1	0	0	0	0.623561180172272	1.65973905109467	0.911162147987378	3.54548759376999	1.82741168703727	3.79406267457135	2.46893187380939	2.7308432141754	3.4524127982838	2.34364815849067	1.49843271980556	1.78061077972051	6.19250904318124	2.40469602872404	4.90930505068572
maker-tulip_contig_43_pilon_pilon-augustus-gene-3.9-mRNA-1	115.707518859345	115.379172319631	117.055763159063	21.5128607159434	22.4819198739187	22.1716122676929	33.9620390561126	41.4213315728448	40.6506715132645	75.8107316546178	92.1204444248502	84.584113557953	44.3162560878237	40.4576834347502	49.4119491372441	18.1904953143449	16.3519329953235	15.7097761621943
maker-tulip_contig_702_pilon_pilon-augustus-gene-0.95-mRNA-1	89.2600859772092	111.586431361027	114.495168339959	7.95040504719647	9.65666357000535	8.95976112187588	9.33023050992103	14.0101562672858	20.0543312798771	15.9754415364137	20.208239784898	21.3421882075726	32.171897448372	35.462907702065	44.7378458404778	4.45086587478652	3.84751364595847	3.73107183852115
maker-tulip_contig_507_pilon_pilon-augustus-gene-1.32-mRNA-1	117.360483414479	120.170003004183	144.124908389596	53.1585906096862	55.0731594226867	58.3143774711922	42.5458511252399	53.197984667085	38.2116312224686	70.001480186831	77.1918348540247	71.87295734609	87.9933354051499	67.4294723912504	80.0161969136903	39.6707610578798	36.0704404308607	40.0599292135955
maker-tulip_contig_211_pilon_pilon-augustus-gene-3.15-mRNA-1	15.9786573662905	20.161412464157	23.5940522617487	16.2125906844791	15.6920783012587	20.501148329716	16.6078103076594	20.3045743004141	24.6614073847138	28.61056347885	24.3955327133003	25.1084567147913	21.7320101969135	23.974923516889	20.4770239667858	19.9321384827396	13.9472369665995	16.6916371723315
maker-tulip_contig_455_pilon_pilon-augustus-gene-1.24-mRNA-1	388.263007728025	478.484214619646	471.515245975101	67.5004977536484	62.3156571001907	61.503444989148	49.8234309229783	41.4213315728448	54.7429043045295	123.010899830386	133.083092637481	139.038079058157	164.126390735514	136.357377502306	190.302777082629	116.883608190046	93.3022059144929	114.288621579964
augustus_masked-tulip_contig_272_pilon_pilon-processed-gene-4.85-mRNA-1	0.367325456696334	0.798471780758692	0	1.24712236034454	0.754426841406668	0.759301789989482	0.186604610198421	0	0	0.435693860084011	0.36411242855672	0.156927854467445	0.639176770497457	0.499477573268521	0.556440868662659	76.4387835017684	138.99143046025	86.0110244880139
maker-tulip_contig_537_pilon_pilon-augustus-gene-2.33-mRNA-1	9.18313641740835	11.3782228758114	9.87658001654595	993.177069719386	760.462256137921	989.066511640299	1058.42134904544	850.355571701344	840.655886894309	392.705399222388	433.839958625332	486.005565285678	739.527523465557	445.034517782252	562.895582739146	2032.30406160904	1162.4300602852	1593.36404725056
maker-tulip_contig_209_pilon_pilon-augustus-gene-2.38-mRNA-1	6.04985027178862	10.2024731786442	7.47693687178516	0.568999576907198	1.44397297445236	1.03568764154565	0.645651951286535	0.351269135397165	1.18157951865222	0.312247266393541	0.294931067130943	0.296593644943472	0.59727518220929	1.03891335239852	0.194754304031931	0	0	0
augustus_masked-tulip_contig_229_pilon_pilon-processed-gene-0.4-mRNA-1	0.183662728348167	1.59694356151738	1.82899629936036	2.02657383555988	1.50885368281334	1.21488286398317	4.10530142436525	2.03045743004141	1.62602686053058	4.06647602745077	2.18467457134032	3.29548494381635	3.97709990531751	1.99791029307409	3.00478069077836	1.3546113531959	1.44281761723443	4.90930505068572
maker-tulip_contig_275_pilon_pilon-augustus-gene-0.5-mRNA-1	1.6529645551335	2.79465123265542	1.82899629936036	4.83259914633511	5.58275862640934	5.01139181393058	8.95702128952419	15.2284307253106	9.48515668642838	52.5737257834706	89.2075449963964	72.6575966184272	14.7010657214415	7.99164117229634	13.1320045004387	59.2158677254206	56.7508262778875	65.7846876791887
maker-tulip_contig_684_pilon_pilon-augustus-gene-0.69-mRNA-1	53.0785284926203	41.9197684898313	46.0907067438811	134.689214917211	107.279496848028	121.943867472311	93.6755143196071	98.4771853570086	94.5805623875287	124.753675270722	119.246820352326	116.283540160377	144.027832285427	149.843271980556	145.342354894686	184.033628127043	191.894743092179	237.217620049134
augustus_masked-tulip_contig_126_pilon_pilon-processed-gene-2.249-mRNA-1	9.36679914575652	25.7507149294678	5.48698889808108	0	0	0	0	0	0	0.14523128669467	0	0	21.1638530675825	21.9770132238149	22.2576347465064	0	0	0
maker-tulip_contig_58_pilon_pilon-augustus-gene-0.27-mRNA-1	32.3246401892774	31.9388712303477	40.9695171056721	30.3986075333983	22.3310345056374	27.9423058716129	21.6461347830168	21.522848758439	23.3063850009383	36.3078216736675	39.6882547126825	36.5641900909148	39.3448812061768	40.4576834347502	33.4977402934921	23.2219089119297	26.4516563159645	25.3320140615383
maker-tulip_contig_3_pilon_pilon-augustus-gene-0.0-mRNA-1	0.550988185044501	1.79656150670706	1.82899629936036	8.88574681745488	12.674370935632	13.9711529358065	7.65078901813524	5.07614357510353	6.23310296536722	9.87572749523757	6.55402371402096	8.00332057783971	18.3230674209271	15.4838047713242	10.0159356359279	29.0273861399121	17.7947506125579	29.4558303041143
augustus_masked-tulip_contig_121_pilon_pilon-processed-gene-0.61-mRNA-1	8.99947368906018	6.38777424606954	10.7910781662261	25.7218986821062	20.0677539814174	22.3234726256908	36.0146897682952	18.4771626133769	23.8483939544485	66.515929306159	70.273698711447	81.4455564686041	119.099938236026	149.843271980556	90.5885734182809	241.507852684068	169.290600422173	195.586713219319
maker-tulip_contig_3_pilon_pilon-augustus-gene-6.13-mRNA-1	107.810021540374	145.122246152892	107.362082772453	224.326134566975	244.585181984042	207.441249025126	103.005744829528	121.015262830468	124.391054830589	105.147451566941	120.339157637996	117.225107287182	88.6325121756473	69.4273826843245	82.9096894307362	153.071082911136	145.243640134932	188.517313946332
maker-tulip_contig_125_pilon_pilon-augustus-gene-0.89-mRNA-1	0.183662728348167	0	0	0.155890295043068	0.150885368281334	0.151860357997896	2.79720310687433	11.2081250138286	3.79406267457135	0	0	0	0	0	0	0	0	0
augustus_masked-tulip_contig_80_pilon_pilon-processed-gene-0.16-mRNA-1	19.8098618796333	20.3231029997606	19.5720893994552	4.93548674106353	4.00147996682097	5.61124022802227	2.70763289397908	1.62436594403313	3.79406267457135	4.54138233494234	7.34778880827461	7.35834709597851	2.15757669863475	0.998955146537043	1.33545808479038	4.48182842000242	9.57549958637915	5.8656376745593
maker-tulip_contig_121_pilon_pilon-augustus-gene-4.33-mRNA-1	0	0	0	3.58547678599056	4.37567568015867	3.49278823395162	13.4355319342863	6.49746377613252	5.42008953510193	0	0	0	2.41466779965706	1.49843271980556	1.44674625852291	11.0304067331666	0.961878411489618	2.94558303041143
maker-tulip_contig_666_pilon_pilon-augustus-gene-0.15-mRNA-1	2.93860365357067	2.59503328746575	1.09739777961622	51.2879070691694	51.6027959522161	45.2543866833731	57.1010107207167	44.8731092039152	70.4611639563251	49.6691000495772	39.3241422841258	41.1150978704707	26.3482868727285	24.9738786634261	20.2544476193208	40.2513087806781	36.0704404308607	45.5583508703635
maker-tulip_contig_372_pilon_pilon-augustus-gene-1.109-mRNA-1	4.77523093705234	2.39541534227608	7.13308556750541	53.4703711997723	52.5081081619041	47.5322920533416	21.4595301728184	16.8527966693437	16.802277558816	30.3533389191861	29.6751629273727	30.6009316211518	30.8225242662107	37.4608179951391	25.0398390898196	38.1226337970845	33.1848051963918	43.7910010521166
maker-tulip_contig_80_pilon_pilon-augustus-gene-0.80-mRNA-1	11.3191339480975	14.0950231098428	10.8130261218185	3.83957796691077	2.27686020736532	0.150341754417917	0	0	0	82.6700053252071	31.657755100864	13.9979646184961	90.1260552293764	58.0692626681983	61.2084955528925	159.387442135181	65.3355911004323	61.8886631909645
maker-tulip_contig_169_pilon_pilon-augustus-gene-0.16-mRNA-1	11.01976370089	3.19388712303477	9.51078075667388	19.4862868803835	19.011556403448	19.4381258237307	22.3925532238105	20.5076200434183	18.4283044193466	45.6026240221264	42.2370417125795	39.2319636168613	32.1008778072056	28.9696992495742	27.3768907382028	47.7984291770552	33.1848051963918	40.6490458196778
maker-tulip_contig_841_pilon_pilon-augustus-gene-0.87-mRNA-1	68.3225349455181	54.2960810915911	60.722677138764	27.7484725176661	29.1208760782974	31.4350941055645	26.8710638685726	21.3198030154348	27.1004476755096	30.9342640659648	37.1394677127855	37.1919015087845	37.7824491005163	38.4597731416761	38.1718435902584	23.4154248195291	21.1613250527716	22.1900588290995
maker-tulip_contig_416_pilon_pilon-augustus-gene-0.21-mRNA-1	0	0	0	0	0	0	0	0	0	0	0	0	0	0	0.111288173732532	135.074103504391	186.604411828986	144.33356849016
maker-tulip_contig_527_pilon_pilon-augustus-gene-3.9-mRNA-1	0	0	0	0.77945147521534	0.905312209688001	0.759301789989482	17.5408333586515	5.48223506111182	92.4125265734879	79.2962825352899	61.3529442118073	68.8913281112085	50.9210827162974	58.9383536456855	88.6966744648278	138.363873933581	119.753862230457	120.179787640787
maker-tulip_contig_282_pilon_pilon-augustus-gene-0.7-mRNA-1	0	0	0	291.826632320623	287.889282680784	243.432153870628	29.1103191909536	24.1624434174928	35.5015864549176	5.51878889439747	6.55402371402096	5.80633061529548	5.89463021680988	5.49425330595373	5.89827320782418	21.0932339283361	24.0469602872404	11.5859599196183
augustus_masked-tulip_contig_217_pilon_pilon-processed-gene-3.66-mRNA-1	109.646648823856	123.363890127218	113.946469450151	9.66519829267022	11.4672879893813	10.326504343857	16.2346010872626	15.4314764683147	14.6342417447752	28.7557947655447	19.6620711420629	26.2069516960634	44.8133935759883	36.4618628486021	46.5184566201983	2.51570679879238	2.88563523446885	4.51656064663087
maker-tulip_contig_75_pilon_pilon-augustus-gene-1.28-mRNA-1	1.46930182678534	0.998089725948365	1.28029740955225	3.27369619590443	4.07390494359601	3.64464859194951	2.61246454277789	3.24873188806626	2.43904029079587	1.4523128669467	1.63850592850524	1.7262063991419	2.84078564665536	2.99686543961113	2.89349251704583	2.70922270639179	1.44281761723443	2.16009422230172
maker-tulip_contig_199_pilon_pilon-augustus-gene-1.36-mRNA-1	14.325692811157	39.5243531475553	11.5226766859703	46.4553079228343	41.0408201725227	38.116949857472	19.2202748504373	13.6040647812775	21.4093536636526	65.7897728726856	75.5533289255194	75.7961537077761	41.5464900823347	40.9571610080187	34.3880456833523	21.6737816511343	22.1232034642612	22.1900588290995
maker-tulip_contig_361_pilon_pilon-augustus-gene-0.0-mRNA-1	114.972867945953	58.4880579405742	72.9769523444784	44.1169534971882	29.875302919704	35.3834634135099	34.3352482765094	28.8324955065881	33.0625461641218	18.0086795501391	15.4747782136606	15.0650740288748	14.8431050037743	11.487984185176	12.0191227631134	37.7356019818857	45.208285340012	44.1837454561715
augustus_masked-tulip_contig_81_pilon_pilon-processed-gene-0.15-mRNA-1	4.41341536220645	24.4971142336767	6.12713760285721	1.270505904601	1.84834576144634	0.92331097662721	3.54921968597396	3.85583865964864	1.44716390587221	4.76068157785129	1.98987442206248	2.76663807426106	0.414044508000019	4.49030338368401	1.47456830195605	0.857275470665403	1.64481208364725	0.754069255785327
maker-tulip_contig_862_pilon_pilon-augustus-gene-1.55-mRNA-1	6.63757100250276	7.50363855967981	8.34388111768197	9.85850225852362	5.72308201891098	4.85041983445281	3.51563085613824	6.80203239063874	6.36589515897721	5.07728578284567	6.43568717474003	6.27397562160846	4.16104077593844	3.15669826305705	4.05088952386416	5.5461659117992	5.45865998520358	6.09146570689084
maker-tulip_contig_587_pilon_pilon-augustus-gene-0.1-mRNA-1	0	0	0	5.61205062155045	4.22479031187734	2.27790536996845	0.559813830595262	0.203045743004141	1.35502238377548	0.14523128669467	0.18205621427836	0	0	0	0	0.580547722798241	0	0.196372202027429
maker-tulip_contig_196_pilon_pilon-augustus-gene-5.54-mRNA-1	129.114898028761	62.0811809539883	100.046097575012	19.9539577655127	42.7005592236174	17.7676618857539	54.4885461779388	121.218308573472	68.5641326190394	29.1914886256287	29.8572191416511	17.1051361369515	14.4880067979423	20.9780580772779	45.9620157515356	125.011276309221	190.932864680689	182.429775683481
maker-tulip_contig_204_pilon_pilon-augustus-gene-1.26-mRNA-1	2.57127819687434	1.59694356151738	3.84089222865676	12.9388944885746	13.7305685136014	12.1488286398317	4.47851064476209	4.06091486008283	2.71004476755096	4.35693860084011	3.82318049984556	6.27711417869781	2.05956959382514	0.998955146537043	2.00318712718557	8.51469993437421	13.9472369665995	10.4077267074537
augustus_masked-tulip_contig_741_pilon_pilon-processed-gene-0.38-mRNA-1	0.183662728348167	0	0.182899629936036	0.623561180172272	1.50885368281334	1.82232429597476	1.49283688158736	4.46700634609111	1.89703133728568	14.523128669467	11.10542907098	12.5542283573956	1.98854995265875	1.49843271980556	2.55962799584823	8.90173174957303	7.69502729191694	4.51656064663087
augustus_masked-tulip_contig_323_pilon_pilon-processed-gene-5.14-mRNA-1	6.06087003548951	6.38777424606954	3.65799259872072	45.2081855624897	39.5319664897094	44.0395038193899	29.8567376317473	26.5989923335425	24.1193984312036	26.867788038514	24.5775889275786	28.4039416586076	14.3459675156096	11.9874617584445	15.3577679750894	22.447845281532	21.6422642585164	27.2957360818126
augustus_masked-tulip_contig_654_pilon_pilon-processed-gene-0.1-mRNA-1	0	0	0	0	0	0	0.933023050992103	0	0.813013430265289	0	0	0	23.294442302574	24.9738786634261	16.3593615386822	45.6697541934616	32.4104930751427	26.9029916777578
maker-tulip_contig_307_pilon_pilon-augustus-gene-1.243-mRNA-1	11.9380773426309	9.38204342391463	12.9858737254586	7.95040504719647	9.65666357000535	6.98557646790323	5.22492908555578	6.49746377613252	8.13013430265289	23.8179310179259	18.9338462849494	18.674414681626	12.0733389982853	7.99164117229634	11.4626818944508	11.223922640766	12.9853585551098	8.44400468717944
maker-tulip_contig_307_pilon_pilon-augustus-gene-1.53-mRNA-1	10.4687755158455	9.18242547872496	11.3397770560342	17.1479324547375	17.9553588254787	15.1860357997896	14.7417642056752	18.0710711273686	14.092232791265	13.3612783759097	12.1977663566501	8.47410414124205	26.9164440020596	28.4702216763057	23.2592283100991	21.0932339283361	14.9091153780891	15.7097761621943
maker-tulip_contig_123_pilon_pilon-augustus-gene-0.66-mRNA-1	36.1815574845889	26.9484226006059	27.9836433802135	34.451755204518	40.1355079628347	37.0539273514867	51.1296631943672	66.1929122193501	44.1737297110807	5.51878889439747	6.55402371402096	7.37560915996993	16.6896156741003	16.4827599178612	15.914208843752	24.3830043575261	33.6657444021366	24.9392696574835
maker-tulip_contig_77_pilon_pilon-augustus-gene-0.33-mRNA-1	5.69354457879318	4.99044862974182	6.21858741782523	6.70328268685192	6.48807083609734	6.52999539390954	7.46418440793683	4.46700634609111	3.25205372106116	5.22832632100813	4.91551778551572	5.80633061529548	4.33219811114943	6.9926860257593	5.00796781796393	4.64438178238593	7.69502729191694	6.0875382628503
augustus_masked-tulip_contig_623_pilon_pilon-processed-gene-2.2-mRNA-1	39.8548120515523	40.1232069831243	28.8981415298937	19.9539577655127	23.085461347044	24.6013779956592	37.5075266498825	39.1878283997993	32.2495327338565	40.2290664144236	33.1342309986615	36.5641900909148	41.1203722353364	45.951936740704	41.6217769759669	31.9301247539033	30.299169961923	39.6671848095406
maker-tulip_contig_683_pilon_pilon-augustus-gene-0.4-mRNA-1	2.93860365357067	9.78127931429398	17.0096655840514	10.9123206530148	12.674370935632	15.0341754417917	21.6461347830168	26.8020380765467	26.0164297684893	4.50216988753478	8.55664207108292	7.68946486890482	25.2829922552327	37.9602955684076	40.8427597598392	102.756946935289	216.422642585164	180.26968146118
augustus_masked-tulip_contig_504_pilon_pilon-processed-gene-2.55-mRNA-1	117.360483414479	82.4422113633349	102.240893134244	95.0930799762715	118.595899469128	102.657602006578	146.671223615959	144.974660504957	127.64310855165	142.181429674082	144.734690351296	156.300143049576	31.6037403190409	26.4723113832316	27.7107552594004	51.6687473290435	36.5513796366055	37.5070905872389
augustus_masked-tulip_contig_362_pilon_pilon-processed-gene-9.9-mRNA-1	1.28563909843717	0.798471780758692	0.914498149680181	0.77945147521534	0.603541473125334	0.911162147987378	1.86604610198421	0.203045743004141	0.813013430265289	1.88800672703071	2.18467457134032	1.56927854467445	5.11341416397965	1.99791029307409	4.5628151230338	10.2563431027689	13.9472369665995	10.2113545054263
maker-tulip_contig_661_pilon_pilon-augustus-gene-1.44-mRNA-1	9.18313641740835	4.39159479417281	8.77918223692973	44.4287340872744	52.9607642667481	53.4548460152595	38.0673404804778	39.1878283997993	52.5748684904887	38.1958284006983	42.965266569693	32.3271380202937	31.1776224720426	26.9717889565001	31.0494004713764	53.2168745898388	64.9267927755492	65.9810598812161
augustus_masked-tulip_contig_199_pilon_pilon-processed-gene-3.10-mRNA-1	7.16284640557851	7.98471780758692	5.48698889808108	7.01506327693806	9.80754893828668	6.98557646790323	10.8230673915084	13.4010190382733	11.6531925004691	1.59754415364137	1.8205621427836	1.25542283573956	3.69302134065197	3.99582058614817	4.67410329676633	2.32219089119297	2.88563523446885	1.57097761621943
maker-tulip_contig_745_pilon_pilon-augustus-gene-1.29-mRNA-1	20.3865628466465	14.3724920536565	11.3397770560342	3.58547678599056	4.37567568015867	3.34092787595372	4.66511525496052	3.4517776310704	2.43904029079587	5.66402018109214	5.09757399979408	6.5909698876327	5.53953201097796	10.9885066119075	6.78857859768444	3.48328633678945	1.44281761723443	2.94558303041143
maker-tulip_contig_72_pilon_pilon-augustus-gene-0.26-mRNA-1	166.881464858995	161.09567412697	151.585384294687	43.6976086035224	41.790720452881	44.4616756146241	67.7356074559247	70.5482434067889	76.4259724897047	126.018639777832	107.746329296362	119.362464665028	113.215960965391	103.601638247357	107.567810084653	53.8458012895369	69.5582373268717	80.6147163763001
maker-tulip_contig_327_pilon_pilon-augustus-gene-4.12-mRNA-1	439.321246208816	448.341904896006	457.066175210154	243.656531152315	162.654427007278	189.977307855368	453.449202782162	489.543286382985	450.40944036697	235.565147018755	273.448433846097	248.259865767499	325.340976183205	255.233039940214	287.90250544606	498.884009791289	457.854123869058	589.116606082287
augustus_masked-tulip_contig_3_pilon_pilon-processed-gene-5.12-mRNA-1	0	0	0	0.467670885129204	0.301770736562667	0	2.23925532238105	1.21827445802485	0.542008953510193	0	0	0	0	0	0	13.9331453471578	21.6422642585164	19.244475798688
augustus_masked-tulip_contig_560_pilon_pilon-processed-gene-1.17-mRNA-1	2.02029001182984	1.19770767113804	3.47509296878469	4.98848944137818	5.28098788984667	2.73348644396213	2.98567376317473	4.26396060308697	4.87808058159174	3.63078216736676	2.91289942845376	3.76626850721869	2.91180528782175	0.998955146537043	3.00478069077836	3.67680224438886	2.40469602872404	4.71293284865829
maker-tulip_contig_691_pilon_pilon-augustus-gene-4.42-mRNA-1	24.9781310553507	10.5797510950527	15.9122678044351	8.2621856372826	7.24249767750401	6.07441431991585	6.3445567467463	4.26396060308697	5.14908505834683	30.7890327792701	33.3162872129399	32.4840658747612	8.80643550463162	8.99059631883338	14.6900389326942	17.9969794067455	20.199446641282	14.3351707480023
maker-tulip_contig_559_pilon_pilon-augustus-gene-1.16-mRNA-1	24.243480141958	31.3400173947787	25.240148931173	95.8725314514868	98.3772601194295	99.3166741306242	49.263617092383	70.4568728224371	62.3310296536722	287.703178942142	350.276156271565	341.318083466694	110.151463449062	100.394992226973	95.9304057574424	209.771243837765	209.208554498992	239.770458675491
augustus_masked-tulip_contig_677_pilon_pilon-processed-gene-1.85-mRNA-1	2.93860365357067	3.39350506822444	1.82899629936036	8.57396622736874	6.94072694094134	4.70767109793479	6.3445567467463	4.46700634609111	7.3171208723876	11.7637342222683	10.0130917853098	9.72952697698161	7.95419981063502	8.99059631883338	6.67729042395191	5.41844541278359	8.17596649766175	7.4621436770423
maker-tulip_contig_584_pilon_pilon-augustus-gene-3.0-mRNA-1	0.183662728348167	0	0	50.9761264790832	60.6559180490961	48.5953145593268	21.4595301728184	23.1472147024721	21.4093536636526	4.50216988753478	4.18729292840228	3.76626850721869	5.25545344631242	4.99477573268521	5.56440868662659	11.223922640766	10.5806625263858	16.2988927682766
maker-tulip_contig_661_pilon_pilon-augustus-gene-0.29-mRNA-1	299.737572664209	335.358147918651	323.183646096976	149.810573536388	148.320317020551	151.404776923903	97.7808157439724	125.076177690551	114.363889190651	149.8786878689	166.035267421864	159.438700138924	176.057690451466	143.350063528066	178.728807014446	108.368908255672	121.677619053437	100.738939640071
maker-tulip_contig_535_pilon_pilon-augustus-gene-0.1-mRNA-1	0	0	0	95.5607508614007	108.486579794279	94.0015616006978	9.33023050992103	9.3401041781905	14.9052462215303	2.03323801372538	2.7308432141754	1.88313425360934	2.91180528782175	1.99791029307409	3.44993338570848	16.6423680535496	15.3900545838339	12.371448727728
maker-tulip_contig_628_pilon_pilon-augustus-gene-0.4-mRNA-1	0	0	0	50.0407847088248	97.9215863072198	89.0235790655268	108.348234819509	168.787865244483	72.5885490988526	0.871387720168021	0.72822485711344	1.41235069020701	0	1.49843271980556	1.11288173732532	2.05513893870577	2.88563523446885	2.09332767361239
augustus_masked-tulip_contig_362_pilon_pilon-processed-gene-3.6-mRNA-1	11.5707518859345	18.3648509574499	18.4728626235396	2.33835442564602	4.52656104844001	4.70767109793479	11.5694858323021	21.3198030154348	14.092232791265	1182.32790498131	495.192902837139	673.84820708321	2.34364815849067	3.49634301287965	1.78061077972051	11.4174385483654	7.21408808617213	10.4077267074537
maker-tulip_contig_236_pilon_pilon-augustus-gene-4.104-mRNA-1	13.5910418977644	10.7793690402423	12.9858737254586	17.6156033398667	19.916868613136	15.6416168737833	44.7851064476209	31.4720901656419	28.9974790127953	2.61416316050406	4.551405356959	3.60934065275124	13.493731821613	10.9885066119075	5.11925599169646	46.0567860086605	26.9325955217093	22.5828032331543
maker-tulip_contig_361_pilon_pilon-augustus-gene-0.40-mRNA-1	6.97918367723035	10.380133149863	4.75539037833694	67.1887171635623	29.5735321831414	55.4290306692322	157.307686397269	150.253849823065	119.512974248998	599.659982762293	572.748850119721	325.311442311014	388.619476462454	305.180797267067	306.487630459392	489.208214411318	411.203020911812	467.758585229336
maker-tulip_contig_6_pilon_pilon-augustus-gene-0.11-mRNA-1	370.631385806601	264.094541485937	302.150188654332	79.9717213570939	101.8476235899	98.4055119826368	169.436986060166	155.533039141172	152.033511459609	64.3374600057389	64.6299560688178	57.1217390261501	112.637150889885	97.8976043606302	121.30410936846	42.9605314870699	36.5513796366055	37.5070905872389
maker-tulip_contig_581_pilon_pilon-augustus-gene-1.14-mRNA-1	39.8548120515523	69.6666628711959	53.0408926814505	81.9982951926538	98.9808015925548	84.5862194048283	131.929459410283	208.731023808257	129.540139888936	170.646761866237	125.618787852068	132.133253461589	196.369307825052	182.808791816279	101.494814444069	272.857429715173	339.06214005009	406.097713792723
maker-tulip_contig_41_pilon_pilon-augustus-gene-0.9-mRNA-1	0	0	0	5.45616032650738	5.43187325812801	2.88534680196003	6.3445567467463	6.29441803312838	6.77511191887741	0	0.72822485711344	0.313855708934891	0.497137488164689	0.499477573268521	0.890305389860254	2.51570679879238	2.88563523446885	1.76734981824686
maker-tulip_contig_648_pilon_pilon-augustus-gene-1.16-mRNA-1	58.5884103430653	71.6628423230926	60.3568778788919	11.0682109480578	15.2394221964147	11.2376664918443	11.9426950526989	9.13705843518636	13.0082148842446	8.13295205490153	10.1951479995882	8.63103199570949	27.2715422078915	29.9686543961113	36.0573682893403	3.67680224438886	2.88563523446885	3.33832743446629
maker-tulip_contig_360_pilon_pilon-augustus-gene-2.26-mRNA-1	0	0	0	0	0	0	0	0	0	0	0	0	0	0	0	7.35360448877772	9.61878411489618	8.44400468717944
maker-tulip_contig_3_pilon_pilon-augustus-gene-2.27-mRNA-1	11.2034264292382	3.99235890379346	10.9739777961622	134.377434327125	135.344175348356	130.599907878191	286.064867434179	220.710722645502	295.66588413981	2.46893187380939	1.45644971422688	2.51084567147913	17.0447138799322	13.9853720515186	16.4706497124147	90.3719288489262	137.067673637271	136.871424813118
maker-tulip_contig_710_pilon_pilon-augustus-gene-0.65-mRNA-1	1.6529645551335	0.998089725948365	1.82899629936036	125.561838142439	246.308292889814	290.065432604622	70.7474058645272	864.195169544506	63.6860520374477	16.104697381572	28.5773639552742	35.8831232025261	3.33792313482005	1.99791029307409	4.5628151230338	9.8693112875701	7.69502729191694	10.8004711115086
maker-tulip_contig_907_pilon_pilon-augustus-gene-8.9-mRNA-1	74.0160795243113	83.041065198904	75.720446793519	63.4473500825287	55.8275862640934	53.1511252992637	57.8474291615104	46.7005208909525	51.2198461067132	207.825971260073	236.855134776146	194.276683830697	49.6427291753025	34.463952555528	54.7537814764056	84.3729357133444	93.3022059144929	91.116701740727
augustus_masked-tulip_contig_843_pilon_pilon-processed-gene-1.2-mRNA-1	2.75494092522251	3.39350506822444	2.37769518916847	9.82108858771328	7.39338304578534	9.11162147987378	14.5551595954768	29.8477242216088	20.5963402333873	11.3280403621843	11.4695414995367	11.1418776671886	14.7010657214415	12.486939331713	19.252854055728	24.770036172725	23.5660210814956	23.7610364453189
maker-tulip_contig_229_pilon_pilon-augustus-gene-0.12-mRNA-1	2.38761546852617	2.59503328746575	2.19479555923243	4.20903796616284	5.73364399469067	4.55581073993689	3.73209220396841	4.46700634609111	6.77511191887741	9.00433977506955	3.45906807128884	4.23705207062102	18.0389888562616	15.4838047713242	14.022309890299	37.1550542590874	33.1848051963918	28.2775970919498
maker-tulip_contig_514_pilon_pilon-augustus-gene-0.16-mRNA-1	8.26482277566752	4.19197684898313	7.31598519744144	207.022311817194	231.156384207003	231.435185588794	99.4602572357582	131.370595723679	102.981701166937	19.0252985570018	25.6699262132488	28.5608695130751	10.9370247396231	8.49111874556486	11.2401055469857	49.7335882530493	62.0411575410804	64.4100822649967
augustus_masked-tulip_contig_559_pilon_pilon-processed-gene-3.33-mRNA-1	0	0	0	27.7484725176661	46.1709226940881	44.4950848933836	26.1246454277789	37.1573709697579	19.2413178496118	0	0	0	0.426117846998304	1.99791029307409	1.55803443225544	3.09625452159062	0	0.981861010137145
maker-tulip_contig_257_pilon_pilon-augustus-gene-0.8-mRNA-1	0.367325456696334	1.39732561632771	0.182899629936036	0.155890295043068	0.150885368281334	0	0	0	0	1.74277544033604	1.27439349994852	1.88313425360934	8.59337658113247	3.49634301287965	5.00796781796393	30.1884815855086	46.1701637515017	43.2018844460344
maker-tulip_contig_39_pilon_pilon-augustus-gene-0.24-mRNA-1	0	0	0	11.2241012431009	10.5619757796933	9.11162147987378	5.03832447535736	7.10660100514495	3.25205372106116	2.61416316050406	2.91289942845376	0.941567126804672	0.497137488164689	0	0.890305389860254	1.16109544559648	1.44281761723443	2.16009422230172
maker-tulip_contig_312_pilon_pilon-augustus-gene-0.1-mRNA-1	274.759441608858	171.671432863119	214.175466655098	62.5120083122703	67.2948742534748	76.9932015049335	113.268998390441	112.487341624294	99.1876384923653	70.7276366203044	60.9888317832506	72.1868130550249	96.2316137804504	98.3970819338987	87.5837927275025	41.4124042262745	38.4751364595847	35.3469963649372
augustus_masked-tulip_contig_505_pilon_pilon-processed-gene-0.38-mRNA-1	5.69354457879318	3.99235890379346	7.86468408724955	2.49424472068909	2.56505126078267	2.88534680196003	3.54548759376999	4.46700634609111	5.42008953510193	17.7182169767498	16.7491717136091	18.3605589726911	5.96564985797626	8.49111874556486	5.67569686035912	4.06383405958769	3.84751364595847	1.374605414192
maker-tulip_contig_351_pilon_pilon-augustus-gene-0.17-mRNA-1	0	0	0	0.155890295043068	0	0	0.373209220396841	0	0	0	0	0.156927854467445	0.284078564665536	0	0	5.80547722798241	9.13784490915137	4.12381624257601
augustus_masked-tulip_contig_287_pilon_pilon-processed-gene-1.155-mRNA-1	69.7918367723035	47.3094530099525	80.6587368017919	158.5404300588	182.722180988695	138.648506852079	62.1393351960741	63.9594090463045	59.8919893628763	172.244306019879	123.798225709285	163.048040791676	22.8683244555757	27.9707441030372	28.7123488229932	55.9260972962306	47.1320421629913	47.1293284865829
augustus_masked-tulip_contig_512_pilon_pilon-processed-gene-0.76-mRNA-1	273.473802510421	277.468943813645	289.713013818681	73.7361095553712	71.8214353019148	73.8041339869776	55.4215692289309	65.5837749903377	64.770069944468	145.52174926806	125.800844066347	147.826038908334	124.071313117673	115.379319425028	119.189634067542	83.5988720829468	87.0499962398104	89.9384685285624
maker-tulip_contig_474_pilon_pilon-augustus-gene-0.109-mRNA-1	227.190794966683	244.33236491216	248.743496713009	109.123206530148	133.080894824136	128.322002508222	252.84924681886	425.380831593676	274.256530476158	184.588965388926	154.201613493771	170.894433515048	171.796511981483	181.809836669742	145.342354894686	75.4712039637714	110.616017321306	105.648244690757
maker-tulip_contig_603_pilon_pilon-augustus-gene-2.9-mRNA-1	1.101976370089	2.1957973970864	1.64609666942433	29.9309366482691	34.5527493364254	34.1685805495267	7.65078901813524	4.87309783209939	9.21415220967328	2.03323801372538	1.63850592850524	2.66777352594657	0.710196411663841	0	0.556440868662659	3.87031815198828	8.17596649766175	6.0875382628503
maker-tulip_contig_837_pilon_pilon-augustus-gene-2.18-mRNA-1	12.4890655276754	15.3705817796048	15.5464685445631	36.1665484499918	30.327959024548	33.5611391175351	23.1389716646042	25.5837636185218	23.3063850009383	21.0585365707272	17.2953403564442	20.5575489352353	30.7515046250443	24.4744010901575	31.1606886451089	36.961538351488	67.3314888042732	61.0717548305304
maker-tulip_contig_732_pilon_pilon-augustus-gene-5.6-mRNA-1	2.57127819687434	3.19388712303477	1.82899629936036	34.7635357946042	34.5527493364254	33.5611391175351	120.359973577981	107.614243792195	112.466857853365	13.651740949299	17.4773965707226	17.262063991419	24.9989136905672	17.9811926376668	27.3768907382028	45.6697541934616	37.5132580480951	100.738939640071
augustus_masked-tulip_contig_4_pilon_pilon-processed-gene-1.57-mRNA-1	5.87720730714135	6.38777424606954	3.29219333884865	3.4295864909475	2.86682199734534	1.97418465397265	1.86604610198421	1.82741168703727	1.35502238377548	2.75939444719873	3.09495564273212	2.98162923488146	10.3688676102921	7.49216359902782	10.2385119833929	12.1915021787631	13.4662977608547	9.62223789934402
maker-tulip_contig_54_pilon_pilon-augustus-gene-0.9-mRNA-1	142.889602654874	130.949372044425	133.150930593434	50.352565298911	48.1324324817454	51.328801003289	50.1966401433751	46.0913836619401	44.7157386645909	81.039057975626	85.930533139386	90.2335163187811	102.765420767758	84.4117098823801	92.4804723717339	57.8612563722247	73.5836984789558	64.4100822649967
maker-tulip_contig_610_pilon_pilon-augustus-gene-0.26-mRNA-1	16.7133082796832	10.380133149863	14.997769654755	20.1098480605558	20.6712954545427	16.8564997377665	16.421205697461	9.94924140720293	16.5312730820609	28.61056347885	24.3955327133003	30.6009316211518	16.4765567506011	19.9791029307409	19.1415658819955	22.0608134663332	24.0469602872404	27.49210828384
maker-tulip_contig_515_pilon_pilon-augustus-gene-3.36-mRNA-1	107.993684268722	101.206298211164	102.42379276418	134.689214917211	152.394221964147	148.367569763945	219.447021593343	279.187896630694	206.776415764139	140.583885520441	137.998610422997	143.11820327431	138.772378839114	140.852675661723	148.681000106662	79.5350380233591	116.387287790244	102.506289458318
maker-tulip_contig_73_pilon_pilon-augustus-gene-0.89-mRNA-1	24.0598174136099	24.1537713679504	18.4728626235396	29.3073754680968	33.496551758456	30.5239319575772	60.8331029246851	47.1066123769608	63.1440430839375	356.397577548721	431.655284053992	406.913926634086	119.170957877192	104.890290386389	95.2626767150472	164.682037367101	151.01491060387	153.563061985449
maker-tulip_contig_169_pilon_pilon-augustus-gene-0.21-mRNA-1	8.08116004731935	9.98089725948365	7.13308556750541	13.4065653737038	15.2394221964147	16.4009186637728	9.33023050992103	11.7766530942402	14.092232791265	4.64740117422945	5.09757399979408	3.60934065275124	5.3264730874788	5.49425330595373	6.82864234022815	6.57954085838007	8.15672892943196	5.89116606082287
augustus_masked-tulip_contig_228_pilon_pilon-processed-gene-1.13-mRNA-1	2.93860365357067	2.39541534227608	2.19479555923243	3.58547678599056	1.05619757796933	1.67046393797686	2.42585993257947	1.82741168703727	2.98104924430606	5.22832632100813	3.45906807128884	5.02169134295825	2.55670708198983	1.99791029307409	1.89189895345304	4.45086587478652	3.84751364595847	4.90930505068572
maker-tulip_contig_128_pilon_pilon-augustus-gene-0.7-mRNA-1	18.3662728348167	48.9063965714699	15.5044016296778	0.77945147521534	1.20708294625067	0.932422598107084	0	0.207106657864224	0.542008953510193	0.871387720168021	1.27439349994852	1.56927854467445	73.5784788376089	72.4242481239356	84.133859341794	1.32945428520797	0.480939205744809	1.07022850104949
augustus_masked-tulip_contig_281_pilon_pilon-processed-gene-3.58-mRNA-1	80.2477558971646	25.2297120925228	32.162899924252	0	0	0	2.77107846144655	2.86700589121848	1.07859781748528	11.2626862831717	6.60317889187612	14.649215214536	0	0	0	3.73485701666869	2.05841980058778	0.284739692939772
augustus_masked-tulip_contig_37_pilon_pilon-processed-gene-0.5-mRNA-1	0	0	0.182899629936036	2.02657383555988	1.96150978765734	3.64464859194951	47.024361770002	21.9289402444473	40.3796670365094	0.29046257338934	0.54616864283508	0	3.90608026415112	2.99686543961113	2.00318712718557	5.22492950518417	2.88563523446885	3.14195523243886
maker-tulip_contig_339_pilon_pilon-augustus-gene-0.83-mRNA-1	4.22424275200784	9.38204342391463	4.93829000827298	0.155890295043068	0.150885368281334	0.303720715995793	0	0	0.271004476755096	0	0.54616864283508	0.156927854467445	48.2933559931412	51.9456676199262	46.2958802727332	0.193515907599414	0	0
maker-tulip_contig_868_pilon_pilon-augustus-gene-0.9-mRNA-1	70.1591622289998	11.577840821001	24.5085504114288	62.2002277221841	53.2625350033107	50.2657784973037	75.2016579099635	39.3908741428034	60.7050027931416	58.3829772512574	83.7458585680456	79.5624222149948	40.5522151060053	27.4712665297687	40.6201834123741	124.430728586423	118.311044613223	148.850129136791
maker-tulip_contig_2_pilon_pilon-augustus-gene-2.29-mRNA-1	4.22424275200784	8.58357164315594	9.51078075667388	10.4446497678856	6.63895620437868	4.85953145593268	31.7227837337315	31.6751359086461	41.7346894202849	395.900487529671	407.805919983527	351.204538298143	75.1387803540343	45.4524591674354	75.0082290957264	111.271646869663	134.662977608546	125.089092691472
augustus_masked-tulip_contig_361_pilon_pilon-processed-gene-1.105-mRNA-1	67.036895847081	79.6475601306795	75.3546475336469	288.803919499738	248.286400067983	318.546842747127	467.410959717208	283.85794871979	397.292562922971	311.518205334334	383.956555913061	407.069285210009	69.6425703241679	57.8444977602274	57.5359858197189	142.195488904049	136.019226168747	118.608810024567
maker-tulip_contig_356_pilon_pilon-augustus-gene-1.42-mRNA-1	49.2216111973088	46.5109812291938	44.9933089642649	36.3224387450348	32.7421249170494	27.9423058716129	27.9906915297631	31.4720901656419	38.4826356992237	40.955222847897	34.9547931414451	41.7428092883405	25.2829922552327	21.4775356505464	17.8061077972051	46.6373337314587	33.1848051963918	37.5070905872389
maker-tulip_contig_425_pilon_pilon-augustus-gene-0.5-mRNA-1	4.04058002365968	1.99617945189673	5.12118963820901	9.82108858771328	6.94072694094134	6.98557646790323	4.47851064476209	3.4517776310704	4.06506715132645	8.85910848837488	6.3719674997426	8.00332057783971	5.25545344631242	2.99686543961113	3.11606886451089	3.28977042919003	0.961878411489618	3.73107183852115
maker-tulip_contig_270_pilon_pilon-augustus-gene-3.68-mRNA-1	13.223716441068	10.380133149863	11.7055763159063	29.6191560581829	28.3664492368907	28.8534680196003	42.3592465150415	38.1725996847786	48.2387968624072	14.523128669467	16.0209468564957	11.9265169395258	17.3287924445977	15.9832823445927	19.0302777082629	21.4802657435349	18.7566290240475	18.6553591926057
maker-tulip_contig_776_pilon_pilon-augustus-gene-0.58-mRNA-1	5.50988185044501	3.39350506822444	8.5962826069937	9.19752740754101	8.75135136031735	9.26348183787168	10.0766489507147	8.52792120617394	10.0271656399386	9.58526492184823	9.28486692819636	9.25874341357927	11.647221151287	10.4890290386389	9.23691841980014	8.90173174957303	12.0234801436202	11.1932155155634
augustus_masked-tulip_contig_515_pilon_pilon-processed-gene-3.69-mRNA-1	0	0.598853835569019	0.548698889808108	12.9388944885746	18.7097856668854	14.1230132938044	1.11962766119052	2.4365489160497	1.35502238377548	0.14523128669467	0.18205621427836	0	0	0	0.111288173732532	0.193515907599414	0	0.196372202027429
maker-tulip_contig_674_pilon_pilon-augustus-gene-0.42-mRNA-1	51.6092266658349	44.9140376676764	38.7747215464397	38.0372319905086	34.401863968144	36.4464859194951	40.1199911926604	30.4568614506212	39.0246446527339	60.7066778383721	59.7144382833021	61.8295746601735	36.8591937653533	30.4681319693798	40.175030717444	58.0547722798241	68.2933672157629	64.999198871079
maker-tulip_contig_597_pilon_pilon-augustus-gene-2.2-mRNA-1	135.726756249295	181.452712177413	184.54572660546	129.54483518079	114.823765262095	125.284795348264	110.843138457862	117.15739371339	111.11183546959	176.165550760635	183.14855156403	196.787529502176	79.4709784651838	68.4284275377874	80.7952141298181	132.558396705598	168.809661216428	168.683721541561
maker-tulip_contig_657_pilon_pilon-augustus-gene-0.3-mRNA-1	0.550988185044501	0	0	7.01506327693806	10.1093196748493	10.7820854178506	60.8331029246851	27.2081295625549	45.5287520948562	76.5368880880912	43.6934914268064	35.936478673045	230.955873073081	180.810881523205	212.003970960473	348.135117771345	430.440589141604	691.033778934522
maker-tulip_contig_145_pilon_pilon-augustus-gene-6.12-mRNA-1	8.99947368906018	9.38204342391463	8.96208186686577	79.1922698818785	55.6767008958121	75.3227375669566	54.115336957542	45.4822464329277	53.6588863975091	14.6683599561617	16.3850592850524	13.1819397752654	41.1203722353364	33.4649974089909	51.9715771330923	76.0517516865696	93.3022059144929	92.2949349528916
maker-tulip_contig_208_pilon_pilon-augustus-gene-1.74-mRNA-1	6.97918367723035	3.79274095860379	8.23048334712163	2.18246413060295	1.65973905109467	3.18906751795582	2.05265071218263	3.4517776310704	2.16803581404077	3.48555088067208	2.18467457134032	1.88313425360934	2.76976600548898	2.49738786634261	2.22576347465064	0.774063630397655	1.44281761723443	1.96372202027429
augustus_masked-tulip_contig_538_pilon_pilon-processed-gene-0.102-mRNA-1	12726.5414354295	9993.67280797579	11448.9681351061	10347.3742237787	10864.0482869926	10482.4649315208	13843.2630075698	12974.8260237076	11830.7004327437	10891.4751143801	10382.4838440806	10596.5533729142	6691.54161033787	6183.53235706429	5703.18503927105	6861.49353575241	6230.567410424	7355.5135713414
maker-tulip_contig_75_pilon_pilon-augustus-gene-0.2-mRNA-1	353.918077526918	200.216799025242	249.475095232753	59.705983001495	73.4811743530094	79.4229672328998	118.680532086196	157.563496571214	105.420741457733	23.2370058711472	22.3929143562383	22.7545388977796	51.773318410294	52.4451451931947	56.7569686035912	8.51469993437421	10.099723320641	7.85488808109716
maker-tulip_contig_177_pilon_pilon-augustus-gene-1.32-mRNA-1	45.7320193586936	6.38777424606954	5.30408926814505	0	0	0	0	0	0	0	0	0	0	0	0	0	0	0
maker-tulip_contig_54_pilon_pilon-augustus-gene-1.6-mRNA-1	31.5899892758847	66.4727757481611	47.1881045234973	28.5279239928814	36.3633737558014	37.0539273514867	27.9906915297631	52.9949389240809	28.18446558253	164.837510398451	131.990755351811	171.051361369515	18.8912245502582	16.4827599178612	23.1479401363666	56.7001609266282	39.9179540768191	56.5551941838995
maker-tulip_contig_196_pilon_pilon-augustus-gene-5.27-mRNA-1	8.99947368906018	14.9713458892255	11.3397770560342	11.379991538144	17.200931984072	10.7820854178506	4.85171986515894	8.73096694917808	10.0271656399386	10.3114213553216	9.83103557103144	10.6710941037863	0.994274976329377	0	1.00159356359279	0.967579537997069	1.44281761723443	1.374605414192
maker-tulip_contig_462_pilon_pilon-augustus-gene-0.5-mRNA-1	37.4671965830261	36.7297019148998	32.7390337585505	54.2498226749877	47.2271202720574	50.5694992132995	44.9717110578194	40.0000113718159	41.1926804667747	40.6647602745077	38.2318049984556	49.1184184483104	37.8534687416827	39.4587282882132	43.736252276885	56.8936768342277	61.0792791295907	56.9479385879544
maker-tulip_contig_113_pilon_pilon-augustus-gene-0.40-mRNA-1	0	0	0	10.9123206530148	12.5234855673507	11.0858061338464	9.14362589972261	34.3147305676999	13.2792193609997	11.1828090754896	13.8362722851554	11.1418776671886	5.75259093447711	7.49216359902782	8.79176572487001	18.3840112219443	7.69502729191694	18.6553591926057
augustus_masked-tulip_contig_907_pilon_pilon-processed-gene-0.3-mRNA-1	0	0	0	1.09123206530148	1.357968314532	0.151860357997896	0.373209220396841	0.203045743004141	0	0.29046257338934	0	0.313855708934891	0.213058923499152	0	0.111288173732532	7.54712039637714	10.099723320641	7.26577147501487
augustus_masked-tulip_contig_16_pilon_pilon-processed-gene-0.4-mRNA-1	0	0	0.182899629936036	0.311780590086136	0.150885368281334	0	0.186604610198421	0	0	0.29046257338934	0	0	0.284078564665536	0.499477573268521	0.445152694930127	2.70922270639179	7.69502729191694	4.51656064663087
maker-tulip_contig_147_pilon_pilon-augustus-gene-1.36-mRNA-1	0	0	0	38.567258993655	49.1644884007897	37.9833127424338	10.4610544477235	8.3248754631698	11.0949232783536	5.17168611919721	4.90823553694459	5.50189057762863	26.0329596659497	22.5164490029449	18.5940280672314	12.8339749919931	11.9753862230457	10.7474506169612
augustus_masked-tulip_contig_611_pilon_pilon-processed-gene-3.20-mRNA-1	66.4859076620365	69.0678090356269	61.0884763986361	6.85917298189499	7.24249767750401	6.98557646790323	6.53116135694472	12.3857903232526	8.67214325616309	17.8634482634444	17.1132841421658	19.6159818084307	39.202841923844	31.9665646891854	42.5120823658271	8.90173174957303	12.504419349365	13.74605414192
maker-tulip_contig_284_pilon_pilon-augustus-gene-1.26-mRNA-1	0.183662728348167	1.19770767113804	1.09739777961622	28.8397045829676	13.2779124087574	22.9309140576823	41.7994326844462	23.1472147024721	60.4339983163865	42.9884608616224	40.962648212631	36.7211179453822	8.52235693996609	5.99373087922226	6.45471407648684	36.961538351488	26.9325955217093	26.5102472737029
maker-tulip_contig_336_pilon_pilon-augustus-gene-0.65-mRNA-1	104.504092430107	129.552046428098	131.870633183882	12.7830041935316	14.937651459852	13.6674322198107	19.4068794606357	29.6446784786046	27.1004476755096	29.1914886256287	31.1316126415996	30.6009316211518	52.0573969749595	55.9414882060744	66.9954805869841	27.0922270639179	22.604142670006	24.9392696574835
maker-tulip_contig_456_pilon_pilon-augustus-gene-0.11-mRNA-1	55.1465708138206	81.939174141457	63.2320600614864	59.3614654494499	61.9112843131968	59.8390554654911	89.7568175054403	88.6578932253283	86.1875537424233	112.167931965762	111.409300327642	97.609125478751	73.1509405977873	60.4367863654911	74.1935996640043	82.2887693884987	113.184232679983	110.777486607713
maker-tulip_contig_505_pilon_pilon-augustus-gene-3.76-mRNA-1	0	0	0	0	0	0	0	0	0	0	0	0	0	0	0.111288173732532	34.2523156450962	42.3226501055432	33.1869021426355
maker-tulip_contig_82_pilon_pilon-augustus-gene-1.36-mRNA-1	0.918313641740835	0.399235890379346	2.56059481910451	0	0	0.303720715995793	0.559813830595262	0.812182972016566	3.25205372106116	6.97110176134417	8.92075449963964	7.06175345103504	6.88890519313925	7.99164117229634	4.67410329676633	21.0932339283361	14.9091153780891	23.5646642432915
maker-tulip_contig_211_pilon_pilon-augustus-gene-4.101-mRNA-1	91.8313641740835	130.350518208856	106.081785362901	26.8131307474077	39.0793103848654	36.9020669934888	44.2252926170257	48.3248868349856	42.0056938970399	88.8815474571382	77.0097786397463	74.2268751631016	59.4434396562635	58.438876072417	69.6663967565649	76.0517516865696	76.9502729191694	72.0685981440664
maker-tulip_contig_326_pilon_pilon-augustus-gene-1.4-mRNA-1	130.033211670502	83.041065198904	82.3048334712163	64.226801557744	79.0639329794188	74.2597150609713	94.9817465909961	102.335054474087	81.572347503284	15.394516389635	13.8362722851554	12.8680840663305	31.3196617543754	24.4744010901575	31.0494004713764	31.5430929387044	24.0469602872404	22.5828032331543
augustus_masked-tulip_contig_272_pilon_pilon-processed-gene-5.4-mRNA-1	0	0.199617945189673	0	0	0	0	0	0	0	0	0	0	0.142039282332768	0	0	127.139951292815	184.199715800262	97.7933566096596
maker-tulip_contig_474_pilon_pilon-augustus-gene-0.104-mRNA-1	668.715993915676	639.575896387712	657.889968879922	19.4862868803835	26.1031687126707	24.905098711655	56.354592279923	81.4213429446607	83.1983743638146	137.679259786547	156.386288065111	164.61731933635	103.617656461754	113.880886705223	110.064003821474	18.1904953143449	15.3900545838339	17.0843815763863
augustus_masked-tulip_contig_31_pilon_pilon-processed-gene-1.17-mRNA-1	1.83662728348167	4.59121273936248	2.37769518916847	17.3038227497805	19.1624417717294	24.905098711655	29.296923801152	14.2132020102899	21.4093536636526	9.7304962085429	7.64636099969112	7.06175345103504	3.40894277598644	2.49738786634261	2.1144753009181	2.12867498359355	2.40469602872404	5.10567725271315
maker-tulip_contig_257_pilon_pilon-augustus-gene-0.23-mRNA-1	287.248507136533	388.656139284293	352.447586886742	102.419923843296	105.016216323808	116.173173868391	114.015416831235	105.989877848162	110.027817562569	364.820992177012	476.077000337912	461.367892134289	123.290097064843	119.375140011177	117.075158766623	173.583769116674	139.472369665995	155.330411803696
maker-tulip_contig_198_pilon_pilon-augustus-gene-5.35-mRNA-1	242.434801419581	190.834755601327	246.731600783713	19.1745062902974	25.348741871264	25.6644005016445	41.239618853851	53.4010304100892	46.8837744786317	30.3533389191861	33.6803996414966	31.8563544568914	60.3666949914265	54.4430554862688	70.111549451495	10.6433749179678	18.7566290240475	8.64037688920687
augustus_masked-tulip_contig_555_pilon_pilon-processed-gene-0.1-mRNA-1	4.22424275200784	1.79656150670706	4.20669148852883	10.4446497678856	6.63895620437868	8.5041800478822	12.1292996628973	12.3857903232526	13.0082148842446	10.3114213553216	12.1977663566501	16.3204968646143	7.88318016946863	9.4900738921019	8.45790120367241	14.3201771623566	15.3900545838339	18.2626147885509
maker-tulip_contig_212_pilon_pilon-augustus-gene-1.104-mRNA-1	7.89749731897118	7.98471780758692	6.40148704776126	57.9911897560213	67.4457596217561	67.8815800250597	23.1389716646042	17.4619338983562	20.3253357566322	128.674920011478	157.478625350781	149.238389598541	64.6988931025759	52.4451451931947	39.9524543699789	135.46113531959	88.4928138570449	66.373804285271
maker-tulip_contig_441_pilon_pilon-augustus-gene-4.25-mRNA-1	24.6108055986544	20.9598842449157	21.9479555923243	2.02657383555988	4.22479031187734	5.31511252992637	2.61246454277789	3.24873188806626	3.25205372106116	8.71387720168021	5.27963021407244	6.43404203316526	7.95419981063502	5.99373087922226	7.45630764007963	5.22492950518417	3.84751364595847	3.14195523243886
augustus_masked-tulip_contig_934_pilon_pilon-processed-gene-3.27-mRNA-1	38.0181847680706	31.140399449589	26.1546470808532	1.87068354051682	2.715936629064	2.88534680196003	4.85171986515894	7.51269249115323	2.71004476755096	2.9046257338934	2.36673078561868	2.98162923488146	4.82933559931412	4.49529815941669	5.11925599169646	0.387031815198828	0.961878411489618	0.785488808109716
maker-tulip_contig_281_pilon_pilon-augustus-gene-3.45-mRNA-1	4.22424275200784	2.99426917784509	3.47509296878469	7.95040504719647	6.33718546781601	5.92255396191796	9.70343973031787	7.30964674814909	6.50410744212231	11.4732716488789	11.651597713815	14.9081461744073	5.25545344631242	1.99791029307409	5.78698503409165	3.67680224438886	5.77127046893771	6.87302707096001
maker-tulip_contig_843_pilon_pilon-augustus-gene-4.7-mRNA-1	18.3662728348167	11.7774587661907	12.0713755757784	35.2312066797334	35.307176177832	34.9278823395162	24.4452039359931	19.4923913283976	22.2223670939179	22.6560807243686	24.5775889275786	26.5208074049983	17.8969495739288	13.4858944782501	15.691632496287	15.6747885155525	15.3900545838339	20.2263368088252
maker-tulip_contig_234_pilon_pilon-augustus-gene-3.22-mRNA-1	3.12226638191884	1.79656150670706	4.20669148852883	6.70328268685192	8.29869525547334	4.55581073993689	3.54548759376999	2.23350317304556	5.14908505834683	6.09971404117615	4.91551778551572	4.39397992508847	8.73541586346524	9.98955146537043	8.23532485620735	6.77305676597948	4.80939205744809	6.28391046487773
maker-tulip_contig_140_pilon_pilon-augustus-gene-0.7-mRNA-1	20.9724469500772	6.47560614195299	6.59170266289474	0	0	0	0	0	0	0	0	0	0	0	0.139110217165665	0	0	0
maker-tulip_contig_674_pilon_pilon-augustus-gene-5.23-mRNA-1	3.85691729531151	1.19770767113804	2.37769518916847	106.940742399545	125.083970305225	116.628754942384	150.216711209729	161.218319945288	113.821880237141	67.823010886411	57.3477074976834	74.697658726504	110.57758129606	86.4096201754542	75.4533817906565	175.905960007867	135.143916814291	208.743650755157
maker-tulip_contig_216_pilon_pilon-augustus-gene-0.66-mRNA-1	33.0592911026701	56.6914964338671	39.5063200661838	17.7714936349098	19.011556403448	26.423702291634	5.59813830595262	4.46700634609111	8.13013430265289	65.4993102992963	82.8355774966538	60.8880075333688	42.8248436233296	41.4566385812873	50.1909663533718	4.2573499671871	5.2903312631929	5.89116606082287
maker-tulip_contig_628_pilon_pilon-augustus-gene-4.25-mRNA-1	71.5605088462963	65.1652782071687	62.1474652559657	31.6051984170316	31.6059580938909	35.1055589583737	29.7373106812203	22.0406154030995	25.6966444859182	25.0799908993026	31.4356465194444	22.7121683770734	19.7874924217779	23.0858534364711	21.4841819390653	36.9963712148559	28.0195181266926	23.2877794384328
maker-tulip_contig_815_pilon_pilon-augustus-gene-1.10-mRNA-1	4.40790548035601	2.39541534227608	6.5843866776973	0.386607931706809	0.603541473125334	0.455581073993689	2.42585993257947	1.21827445802485	2.01898335182547	183.427115095368	204.813241063155	177.171547693746	31.9588385248728	34.9634301287965	43.0685232344898	183.453080404244	205.361040853033	184.393497703756
maker-tulip_contig_216_pilon_pilon-augustus-gene-0.60-mRNA-1	78.6076477330155	116.576879990769	51.0289967521541	14.1860168489192	17.3518173523534	20.8048690457118	27.057668478771	17.6649796413603	24.9324118614689	19.1705298436965	26.9443197131973	23.8530338790517	118.531781106695	104.390812813121	129.094281529737	28.8338702323127	15.3900545838339	20.2263368088252
maker-tulip_contig_674_pilon_pilon-augustus-gene-2.12-mRNA-1	177.969183769374	161.890153548825	153.63568914627	1.40301265538761	4.97921715328401	3.18906751795582	7.09097518753998	12.1827445802485	8.13013430265289	31.9508830728274	32.0418937129914	34.9949115462403	247.006311976684	301.184976680918	306.598918633125	3.67680224438886	2.40469602872404	1.76734981824686
maker-tulip_contig_178_pilon_pilon-augustus-gene-0.60-mRNA-1	0	0	0	32.4251813689581	44.9638397478374	32.8018373275456	7.65078901813524	6.49746377613252	5.42008953510193	0.580925146778681	0.9102810713918	1.25542283573956	0.568157129331073	0.499477573268521	0.333864521197595	1.74164316839472	2.40469602872404	2.16009422230172
maker-tulip_contig_560_pilon_pilon-augustus-gene-0.19-mRNA-1	50.6909130240941	64.8758321866437	66.7583649266532	28.6838142879245	39.6828518579907	29.309049093594	5.4115336957542	8.12182972016566	8.67214325616309	6.8258704746495	5.09757399979408	4.39397992508847	29.1890725193839	27.4712665297687	29.936518734051	5.611961320383	2.40469602872404	3.14195523243886
maker-tulip_contig_159_pilon_pilon-augustus-gene-1.45-mRNA-1	2.38761546852617	1.59694356151738	1.82899629936036	0	0.452656104844001	0.151860357997896	0	0.203045743004141	0	2.61416316050406	3.27701185701048	1.7262063991419	5.18443380514604	0.998955146537043	2.00318712718557	7.16008858117831	0.961878411489618	2.35646642432915
maker-tulip_contig_855_pilon_pilon-augustus-gene-2.19-mRNA-1	0.550988185044501	0	0.914498149680181	2.33835442564602	2.86682199734534	3.18906751795582	1.67944149178579	1.82741168703727	2.16803581404077	8.13295205490153	4.551405356959	6.27711417869781	1.13631425866215	2.49738786634261	0.779017216127722	3.87031815198828	6.25220967468252	5.69479385879544
maker-tulip_contig_387_pilon_pilon-augustus-gene-1.78-mRNA-1	9.18313641740835	21.359120135295	6.21858741782523	69.2152909991222	50.8483691108094	78.0562240109187	116.068067543418	84.4670290897228	117.073933958202	113.280403621843	119.610932780883	126.326922846293	111.35879734889	79.9164117229634	129.205569703469	102.950462842888	138.02955204876	109.379316529278
augustus_masked-tulip_contig_378_pilon_pilon-processed-gene-2.56-mRNA-1	6.79552094888218	2.99426917784509	12.4371748356505	19.1745062902974	21.1239515593867	16.7046393797686	11.5694858323021	12.1827445802485	12.4662059307344	16.8468292565817	17.6594527850009	16.7912804280167	11.9312997159525	8.49111874556486	11.4626818944508	8.32118402677479	8.17596649766175	9.81861010137145
maker-tulip_contig_1_pilon_pilon-augustus-gene-1.11-mRNA-1	273.841127967117	223.172862722054	233.01412853851	92.7547255506255	88.4188258128615	97.0387687606558	125.21169344314	223.147271561551	136.044247331058	475.342001351656	670.695093401479	660.666267307945	205.033704047351	238.750280022353	339.095065363024	277.888843312758	426.593075495646	490.930505068572
maker-tulip_contig_112_pilon_pilon-augustus-gene-1.5-mRNA-1	0.550988185044501	0.199617945189673	0.365799259872072	1.09123206530148	0.905312209688001	1.67046393797686	12.1292996628973	5.68528080411596	5.69109401185703	8.42341462829087	6.00785507118588	5.96325846976292	39.4159008473432	28.9696992495742	26.0414326534124	39.8642769654792	42.803589311288	53.6096111534881
maker-tulip_contig_318_pilon_pilon-augustus-gene-0.56-mRNA-1	0	0	0	31.8016201887859	31.233271234236	25.9681212176403	23.512180885001	21.9289402444473	18.4283044193466	13.7969722359937	9.46692314247472	13.025011920798	9.800710480961	4.99477573268521	9.34820659353267	29.8014497703097	24.0469602872404	39.0780682034584
maker-tulip_contig_482_pilon_pilon-augustus-gene-2.10-mRNA-1	6.24453276383768	5.1900665749315	8.41338297705766	69.8388521792945	37.117800597208	60.2885621251649	49.8234309229783	46.7005208909525	46.8837744786317	20.0419175638645	15.8388906422173	22.5976110433121	23.2234226614076	12.9864169049816	20.6996003142509	58.441804095023	46.6511029572465	66.7665486893258
maker-tulip_contig_78_pilon_pilon-augustus-gene-0.27-mRNA-1	13.5910418977644	22.556827806433	18.2899629936036	2.33835442564602	2.41416589250134	1.06302250598527	2.79906915297631	4.06091486008283	2.71004476755096	5.95448275448148	4.73346157123736	4.39397992508847	4.68729631698135	2.99686543961113	5.67569686035912	3.09625452159062	1.44281761723443	0.785488808109716
maker-tulip_contig_2_pilon_pilon-augustus-gene-5.68-mRNA-1	0	2.1957973970864	2.92639407897658	314.742505691954	327.119478433931	342.748828001252	445.798413764027	327.918874951688	419.243925540134	91.4957106176422	190.430800135165	206.203200770223	13.7778103862785	14.9843271980556	10.683664678323	26.7051952487191	32.703865990647	22.7791754351818
maker-tulip_contig_2_pilon_pilon-augustus-gene-8.12-mRNA-1	1972.17037700262	1931.70285560047	1666.21562871729	1419.22524607209	1484.25936778348	1476.69012117154	2153.41720168977	2474.72151573448	1857.73568815619	800.660083547717	768.095168040401	744.936525156963	466.528022821977	519.956153772531	510.812717432321	466.953885037385	457.854123869058	421.807489954917
maker-tulip_contig_59_pilon_pilon-augustus-gene-1.32-mRNA-1	186.050343816693	251.718228884178	231.368031869086	12.4712236034454	16.4465051426654	15.4897565157854	26.3112500379773	37.7665081987703	37.3986177922033	52.5737257834706	45.51405356959	52.4139033921267	111.145738425391	120.873572730982	131.208756830655	12.5785339939619	12.0234801436202	7.26577147501487
maker-tulip_contig_507_pilon_pilon-augustus-gene-0.75-mRNA-1	133.339140780769	102.004769991923	118.336060568615	54.8733838551599	55.9784716323747	58.4662378291901	68.4838919428204	72.8934217384868	82.1143564567942	91.9314044777262	95.3974562818607	96.6675583519463	88.0643550463162	86.4096201754542	95.0401003675821	63.2797017850083	66.3696103927836	61.2681270325578
maker-tulip_contig_360_pilon_pilon-augustus-gene-0.46-mRNA-1	9.71208507505107	13.2007347153931	6.84227515590711	4.27607079303136	2.23913886529499	2.97950022391873	1.36034760834649	0.653807292473335	2.68294431987545	16.8439246308479	15.4838810243745	21.2621550017942	2.15970728786974	2.8020691860364	1.11288173732532	6.48084774550437	5.1508588935269	6.87106334893974
maker-tulip_contig_704_pilon_pilon-augustus-gene-1.12-mRNA-1	2507.54723013752	2602.61876938296	2295.02455643738	1087.02302733531	1215.53252687442	1219.7423954391	1829.84480760571	2052.99550751487	1523.04515936364	885.184692404015	822.165863681074	797.35042854909	577.957839812034	561.412792353818	581.035555057548	389.741037905219	375.613519686696	367.019645589265
maker-tulip_contig_199_pilon_pilon-augustus-gene-0.27-mRNA-1	49.7725993823533	13.1747843825184	36.0312270973991	16.5243712745652	16.1447344061027	11.8451079238359	18.1006471892468	19.8984828144059	21.9513626171628	17.5729856900551	15.1106657851039	18.674414681626	17.9679692150952	15.4838047713242	10.7949528520556	19.3515907599414	10.5806625263858	10.2113545054263
maker-tulip_contig_667_pilon_pilon-augustus-gene-0.77-mRNA-1	98.1824213203631	131.490336675889	124.805220479453	91.4873374519253	86.9522200331669	96.0547136408294	105.078922048833	87.3380958958014	94.415249656708	159.051495936535	129.554843204767	153.589999002923	122.911562377426	106.743352183216	113.026495006234	151.840321738804	118.724652330164	135.504674287007
augustus_masked-tulip_contig_661_pilon_pilon-processed-gene-1.51-mRNA-1	1.6529645551335	1.99617945189673	3.47509296878469	17.1479324547375	13.57968314532	11.693247565838	9.51683512011945	5.8883265471201	15.1762506982854	7.98772076820686	9.83103557103144	7.84639272337227	12.0733389982853	6.9926860257593	6.67729042395191	17.0293998687484	20.6803858470268	17.2807537784137
maker-tulip_contig_121_pilon_pilon-augustus-gene-2.2-mRNA-1	167.867733710225	105.398275060147	118.153160938679	113.488134791354	216.520503483714	155.505006589846	176.154752027309	245.685349035011	225.204720183485	34.5650462333315	44.0576038553631	38.2903964900567	62.9234020734163	57.9393984991485	70.2228376252275	84.179419805745	108.211321292582	110.75392194347
maker-tulip_contig_40_pilon_pilon-augustus-gene-0.8-mRNA-1	67.4042213037773	82.8414472537143	54.5040897209388	36.790109630164	33.9492078633	39.7874137954488	43.2922695660336	40.20305711482	35.7725909316727	32.6770395063008	37.6856363556205	31.2286430390216	99.4985172741041	104.390812813121	109.618851126544	44.1216269326663	46.1701637515017	52.4313779413235
maker-tulip_contig_424_pilon_pilon-augustus-gene-0.81-mRNA-1	42.9770784334711	40.1232069831243	46.2736063738171	14.0301265538761	13.8814538818827	17.1602204537623	8.95702128952419	8.12182972016566	8.67214325616309	20.0419175638645	23.8493640704652	20.086765371833	33.7343295540324	28.9696992495742	44.0701167980826	19.158074852342	19.2375682297924	18.0662425865235
maker-tulip_contig_289_pilon_pilon-augustus-gene-0.23-mRNA-1	0	0	0	0.77945147521534	1.20708294625067	1.67046393797686	0.186604610198421	1.62436594403313	0.542008953510193	0	0.9102810713918	0.941567126804672	1.42039282332768	0.499477573268521	2.78220434331329	1.3546113531959	9.61878411489618	18.6553591926057
maker-tulip_contig_362_pilon_pilon-augustus-gene-7.16-mRNA-1	48.1196348272198	45.9121273936248	58.3449819495955	10.6005400629286	11.0146318845373	13.9711529358065	11.5694858323021	17.0558424123479	14.092232791265	39.212447407561	46.2422784267035	46.6075727768313	13.0676139746147	15.4838047713242	16.8045142336123	12.7720499015613	12.9853585551098	11.3895877175909
augustus_masked-tulip_contig_333_pilon_pilon-processed-gene-1.64-mRNA-1	17.4479591930759	12.5759305469494	13.7174722452027	10.7564303579717	9.65666357000535	11.0858061338464	13.0623227138894	18.0710711273686	15.9892641285507	7.69725819481752	9.28486692819636	11.1418776671886	26.4193065138949	23.4754459436205	24.3721100474245	37.1550542590874	23.0850818757508	43.0055122440069
maker-tulip_contig_234_pilon_pilon-augustus-gene-2.26-mRNA-1	136.461407162688	87.4326599930768	107.727882032325	26.3454598622785	33.7983224950187	29.309049093594	70.3499380448046	66.1929122193501	62.6020341304273	40.2290664144236	35.6830179985586	38.2903964900567	22.3001673262446	31.9665646891854	23.1479401363666	17.9969794067455	20.6803858470268	15.3170317581395
maker-tulip_contig_138_pilon_pilon-augustus-gene-0.73-mRNA-1	101.749151504885	81.2445036921969	96.022305716419	181.92397431526	238.247996516226	231.73890630479	267.591011024535	280.203125345715	168.293780064915	32.8222707929955	16.5671154993308	12.7111562118631	118.531781106695	123.870438170593	141.335980640315	20.8997180207367	23.0850818757508	21.2081978189623
maker-tulip_contig_59_pilon_pilon-augustus-gene-2.31-mRNA-1	892.049871587047	816.237777880573	895.476588166833	143.886742324752	210.786859489023	175.39871348757	186.231400978024	262.741191447359	241.735993265546	293.657661696623	290.925830416819	302.2430477043	561.3392437791	557.916449340938	494.898508588569	111.465162777262	165.924025981959	115.859599196183
maker-tulip_contig_687_pilon_pilon-augustus-gene-2.11-mRNA-1	0.183662728348167	0	0	0	0	0	0	0	0	0.14523128669467	0.18205621427836	0.313855708934891	0.284078564665536	0.499477573268521	0.222576347465064	30.381997493108	3.36657444021366	6.0875382628503
maker-tulip_contig_65_pilon_pilon-augustus-gene-0.4-mRNA-1	16.7133082796832	14.9713458892255	16.2780670643072	18.395054815082	16.1447344061027	17.0083600957644	16.2346010872626	28.8324955065881	21.1383491868975	17.5729856900551	18.205621427836	13.025011920798	20.0964278608517	21.4775356505464	22.2431672839211	11.9979862711637	18.2756898183027	13.74605414192
augustus_masked-tulip_contig_698_pilon_pilon-processed-gene-1.10-mRNA-1	0	0.598853835569019	0	17.1479324547375	23.6890028201694	18.3751033177455	6.3445567467463	6.29441803312838	9.21415220967328	1.88800672703071	0.9102810713918	0.941567126804672	1.13631425866215	0.499477573268521	0.890305389860254	3.09625452159062	5.77127046893771	4.12381624257601
maker-tulip_contig_137_pilon_pilon-augustus-gene-0.2-mRNA-1	224.986842226505	203.211068203087	207.591079977401	193.61574644349	210.635974120742	201.063113989215	201.906188234691	220.710722645502	198.104272507975	123.591824977164	97.582130853201	100.7476825681	89.129649663812	96.3991716408246	81.7968076934108	109.142971886069	99.5544155891755	100.542567438044
augustus_masked-tulip_contig_778_pilon_pilon-processed-gene-0.7-mRNA-1	0.550988185044501	0	0.365799259872072	0.77945147521534	3.47036347047067	3.94836930794531	8.95702128952419	13.1979732952692	9.48515668642838	17.1372918299711	14.5644971422688	11.4557333761235	9.01949442813078	6.9926860257593	9.1256302460676	19.7386225751402	20.6803858470268	22.5828032331543
maker-tulip_contig_279_pilon_pilon-augustus-gene-3.4-mRNA-1	4.77523093705234	4.79083068455215	5.48698889808108	35.3870969747764	29.1208760782974	29.4609094515919	13.9953457648815	12.5888360662568	19.5123223263669	29.6271824857127	27.308432141754	31.8563544568914	15.1271835684398	14.4848496247871	14.9126152801593	26.1246475259209	23.0850818757508	31.6159245264161
maker-tulip_contig_586_pilon_pilon-augustus-gene-10.51-mRNA-1	0	0	0	112.552793021095	166.728331950874	175.702434203566	72.9624025875825	122.436583031497	53.1168774439989	30.9342640659648	35.8650742128369	39.0750357623939	4.68729631698135	5.99373087922226	3.78379790690608	17.0293998687484	9.13784490915137	9.81861010137145
maker-tulip_contig_586_pilon_pilon-augustus-gene-12.35-mRNA-1	0	0	0	66.409265688347	62.9191985733161	62.7183278531312	26.6844592583741	29.6446784786046	28.7264745360402	3.9212447407561	5.82579885690752	4.08012421615358	56.8157129331073	37.4608179951391	38.505708111456	126.559403570017	88.0118746513	149.831990146928
augustus_masked-tulip_contig_747_pilon_pilon-processed-gene-0.9-mRNA-1	59.014507872833	41.7600741336796	41.6718516846265	1.94239307623663	4.67593756303853	2.29309140576824	2.95581702554298	2.1279193866834	1.89703133728568	3.74551488385554	3.95061984984041	3.23585235911872	1.61853762218189	4.2555489242478	4.1009692020438	5.84611556857829	4.05912689648619	2.15223933422062
maker-tulip_contig_211_pilon_pilon-augustus-gene-2.50-mRNA-1	5.87720730714135	12.7755484921391	4.20669148852883	1.24712236034454	0.754426841406668	0.911162147987378	0.746418440793682	2.03045743004141	2.43904029079587	129.546307731646	107.595222638511	131.662469898187	22.5842458909101	25.4733562366946	27.1543143907377	3.67680224438886	1.92375682297924	2.35646642432915
augustus_masked-tulip_contig_169_pilon_pilon-processed-gene-0.3-mRNA-1	30.8553383624921	27.7468943813645	26.1546470808532	360.886033024702	210.786859489023	269.24841473027	506.071702858117	204.670108948175	373.444168968523	35.8721278135835	36.5932990699504	28.2470138041402	122.224802447347	96.8986492140931	102.496408007662	207.83608476177	182.756898183027	242.323297301847
augustus_masked-tulip_contig_831_pilon_pilon-processed-gene-0.2-mRNA-1	154.093029084112	10.5797510950527	46.2736063738171	2.33835442564602	1.20708294625067	1.97418465397265	1.86604610198421	2.03045743004141	1.62602686053058	0.14523128669467	0.72822485711344	0	1.06529461749576	1.49843271980556	1.11288173732532	6.38602495078066	2.40469602872404	1.76734981824686
maker-tulip_contig_218_pilon_pilon-augustus-gene-0.98-mRNA-1	0	0	0	1.87068354051682	0.905312209688001	34.0167201915288	2210.33160780029	896.24390962028	1320.60481522758	0.29046257338934	0	0	0	0	0.111288173732532	0	0	0
maker-tulip_contig_145_pilon_pilon-augustus-gene-2.107-mRNA-1	45.1810311736491	25.7507149294678	40.420818215864	62.8237889023564	74.8391426675414	65.4518142970933	100.206675676552	92.3858130668843	103.794714597202	27.4487131852927	22.9390829990734	21.49911606204	40.9073133118372	36.9613404218706	34.4993338570848	15.0942407927543	14.4281761723443	17.6734981824686
maker-tulip_contig_867_pilon_pilon-augustus-gene-0.10-mRNA-1	5.69354457879318	1.79656150670706	5.66988852801712	2301.7202063109	2055.05871599176	2211.54239352336	2435.19016308939	1827.61473278028	2189.71617218118	1009.79313638804	1022.24564317299	1071.34646244925	718.718768603807	412.568475519799	584.596776616989	1730.61276166156	1435.60352914825	2094.70227902658
augustus_masked-tulip_contig_645_pilon_pilon-processed-gene-2.38-mRNA-1	42.7934157051229	68.0697193096785	29.4468404197018	156.669746518283	124.027772727256	111.009921696462	113.268998390441	141.116791387878	107.317772795018	138.986341366799	98.8565243531495	92.2735784268579	150.348580349235	85.4106650289171	84.2451475155265	174.357832747072	154.862424249828	177.324098430768
augustus_masked-tulip_contig_895_pilon_pilon-processed-gene-2.8-mRNA-1	0.550988185044501	2.39541534227608	3.10929370891261	5.30027003146431	4.67744641672134	5.46697288792427	2.23925532238105	3.24873188806626	3.25205372106116	7.26156433473351	8.37458585680456	11.2988055216561	14.2749478744432	15.4838047713242	13.2432926741713	6.38602495078066	10.099723320641	5.30204945474058
maker-tulip_contig_537_pilon_pilon-augustus-gene-1.4-mRNA-1	6.61185822053401	15.9694356151738	11.3397770560342	39.602370552741	31.8368127073614	32.3462562535519	85.2783068606782	69.8477355934246	65.8540878514884	78.7676406517213	106.866997781397	100.11997115023	22.3101100760079	23.150785520996	34.1654693358873	25.9311316183214	28.3754131389437	40.2563014156229
augustus_masked-tulip_contig_673_pilon_pilon-processed-gene-1.4-mRNA-1	8.26482277566752	12.7755484921391	9.51078075667388	67.3446074586054	88.7205965494241	71.5262286170092	63.8187766878599	88.5279439498056	66.1250923282435	38.1958284006983	41.6908730697445	36.0934065275124	41.972607929333	35.462907702065	34.6106220308174	66.7629881217978	65.8886711870388	52.627750143351
augustus_masked-tulip_contig_416_pilon_pilon-processed-gene-0.4-mRNA-1	0	0	0	0	0	0	0	0	0	1.01661900686269	0	0.156927854467445	0	0	0	437.539467082275	513.643071735456	380.765699731185
maker-tulip_contig_362_pilon_pilon-augustus-gene-0.21-mRNA-1	27.5494092522251	23.7545354775711	19.9360596630279	10.9123206530148	11.3164026211	8.95976112187588	5.03832447535736	5.8883265471201	5.69109401185703	20.9133052840325	18.5697338563927	21.0283324986377	23.4364815849067	26.9717889565001	28.6010606492607	6.57954085838007	12.504419349365	12.371448727728
maker-tulip_contig_429_pilon_pilon-augustus-gene-1.51-mRNA-1	33.6102792877146	30.7411635592096	28.3494426400856	79.9717213570939	93.3980429661455	89.5976112187588	39.933386582462	31.6751359086461	36.585604361938	63.0303784254869	65.9043495687663	71.2452459282202	42.8248436233296	31.4670871159168	47.7426265312561	46.8308496390581	46.6511029572465	38.2925793953486
maker-tulip_contig_859_pilon_pilon-augustus-gene-0.20-mRNA-1	2.42618464147929	3.94844295585173	6.43257998485039	0.484818817583941	0	1.66135231649699	1.33608900902069	1.20000034115448	1.45529404017487	3.14135273120572	1.14877471209645	2.48102937913031	1.28545550511155	0	1.33211943957841	1.39524969379177	1.47167396957912	1.23321742873225
maker-tulip_contig_441_pilon_pilon-augustus-gene-10.12-mRNA-1	463.197400894077	357.715357779894	426.3390373809	440.234193201624	452.052563370875	439.180155329916	221.126463085128	234.111741683775	219.784630648383	167.30644227226	193.343699563618	166.186597881025	209.578961081999	155.33752528651	209.66691931209	490.756341672113	582.898317362708	577.530646162668
maker-tulip_contig_505_pilon_pilon-augustus-gene-0.5-mRNA-1	3.85691729531151	7.3858639720179	6.40148704776126	10.6005400629286	16.5973905109467	12.7562700718233	19.4068794606357	13.4010190382733	10.2981701166937	47.7810933225465	41.5088168554661	36.8780457998497	36.6461348418542	41.9561161545558	50.5248308745694	181.324405420651	195.742256738137	169.665582551699
maker-tulip_contig_673_pilon_pilon-augustus-gene-1.31-mRNA-1	1.83662728348167	2.79465123265542	0.914498149680181	6.54739239180886	6.03541473125334	6.52999539390954	3.91869681416683	3.04568614506212	3.52305819781625	2.9046257338934	1.8205621427836	3.29548494381635	3.33792313482005	2.99686543961113	3.33864521197595	4.45086587478652	2.88563523446885	4.51656064663087
maker-tulip_contig_531_pilon_pilon-augustus-gene-3.8-mRNA-1	53.0785284926203	36.1308480793308	32.1903348687424	34.7635357946042	44.8129543795561	38.8762516474615	80.7997962159161	69.6446898504205	56.6399356418151	15.6849789630244	11.8336539280934	9.57259912251417	36.8591937653533	25.9728338099631	26.0414326534124	22.0608134663332	13.9472369665995	13.9424263439475
maker-tulip_contig_95_pilon_pilon-augustus-gene-0.56-mRNA-1	4.59156820870418	6.98662808163856	4.38959111846487	261.272134492182	239.756850199039	240.850527784664	36.5745035988904	24.9746263895094	25.203416338224	7.26156433473351	5.27963021407244	6.74789774210015	15.2692228507726	13.4858944782501	19.4754304031931	65.021344953403	80.7977865651279	71.872225942039
augustus_masked-tulip_contig_112_pilon_pilon-processed-gene-2.55-mRNA-1	47.0176584571308	23.3552995871917	35.299628577655	145.757425865269	145.302609654924	143.508038308012	348.390807240451	492.792018271051	372.902160015013	63.1756097121815	72.4583732827873	74.3838030175691	136.286691398291	150.842227127093	145.676219415884	273.050945622773	407.355507265853	385.67500478187
maker-tulip_contig_194_pilon_pilon-augustus-gene-0.13-mRNA-1	74.750730437704	67.6704834192991	76.086246053391	58.4588606411505	38.6266542800214	41.6097380914236	48.1439894311925	45.2792006899235	62.3310296536722	226.270344670296	282.915356988572	248.259865767499	127.551275534826	104.390812813121	110.175291995206	182.098469051048	157.748059484297	173.39665439022
augustus_masked-tulip_contig_586_pilon_pilon-processed-gene-2.46-mRNA-1	25.7182918505938	49.4094337933479	25.5711972613572	27.9932202808837	33.3215247312497	30.4282599320385	25.1934884228888	31.8050851841687	27.3714521522647	52.0842963473096	53.8194580649688	48.845363981537	42.8326557838579	47.949847033778	45.7950834909368	51.8564577594149	96.4764046724087	105.351722665695
maker-tulip_contig_616_pilon_pilon-augustus-gene-0.14-mRNA-1	74.0160795243113	68.8681910904372	60.539777508828	52.3791391344708	55.0731594226867	60.4404224831627	79.6801685547256	95.6345449549506	72.0871908168557	14.8135912428564	13.2901036423203	10.9849498127212	32.2429170895384	18.4806702109353	32.1622822087017	24.770036172725	17.7947506125579	20.0299646067977
augustus_masked-tulip_contig_40_pilon_pilon-processed-gene-0.52-mRNA-1	11.01976370089	8.38395369796627	10.4252789063541	7.7945147521534	7.39338304578534	11.3895268498422	11.9426950526989	14.2132020102899	9.48515668642838	4.79263246092412	3.82318049984556	2.98162923488146	5.82361057564349	6.9926860257593	8.34661302993988	6.57954085838007	4.32845285170328	8.64037688920687
maker-tulip_contig_340_pilon_pilon-augustus-gene-0.21-mRNA-1	76.0363695361412	41.520532599452	59.2594800992757	23.5394345515033	31.233271234236	30.9795130315709	51.5028724147641	49.5431612930105	47.696787908897	20.4776114239485	12.7439349994852	14.2804347565375	31.0355831897098	24.4744010901575	29.936518734051	6.77305676597948	9.61878411489618	5.89116606082287
maker-tulip_contig_339_pilon_pilon-augustus-gene-2.8-mRNA-1	0	0	0	0	0	0	0	0	0	0	0	0	0.142039282332768	0	0	22.447845281532	25.9707171102197	10.8004711115086
augustus_masked-tulip_contig_479_pilon_pilon-processed-gene-1.10-mRNA-1	36.1282952933679	26.0501418472523	28.6384240553845	0.935341770258408	0	0.911162147987378	0.373209220396841	0.406091486008283	0.271004476755096	0.726156433473351	0.781021159254165	1.88313425360934	2.00488447012702	2.99686543961113	1.78061077972051	0.967579537997069	1.44281761723443	0.785488808109716
maker-tulip_contig_907_pilon_pilon-augustus-gene-2.16-mRNA-1	2.203952740178	1.59694356151738	2.19479555923243	4.67670885129204	5.73364399469067	6.68185575190744	3.35888298357157	6.70050951913667	4.87808058159174	4.93786374761879	5.27963021407244	3.60934065275124	15.9794192624364	12.9864169049816	7.23373129261456	17.9969794067455	31.7419875791574	13.5496819398926
maker-tulip_contig_468_pilon_pilon-augustus-gene-3.27-mRNA-1	9.91778733080102	0.798471780758692	3.65799259872072	300.088817957906	223.913886529499	274.563527260197	626.058467215701	430.050883682771	554.475159440927	167.015979698871	165.124986350473	174.032990604397	136.073632474792	108.886110972538	102.162543486464	318.914215723834	266.921259188369	282.57959871747
augustus_masked-tulip_contig_537_pilon_pilon-processed-gene-1.34-mRNA-1	635.105714627962	768.728706925431	743.669895319923	80.28350194718	77.1024231917614	83.8269176148388	70.9097518753998	63.3502718172921	69.1061415725496	107.616383440751	148.557870851142	137.311872659015	46.3048060404824	43.4545488743614	48.966796442314	68.3111153825931	65.407731981294	69.3193873156824
augustus_masked-tulip_contig_773_pilon_pilon-processed-gene-1.11-mRNA-1	44.4463802602564	35.9312301341411	36.9457252470793	73.8919998504142	66.8422181486307	75.6264582829524	130.250017918498	119.593942629439	105.691745934488	34.2745836599422	42.965266569693	39.0750357623939	61.7160681735878	53.9435779130003	61.5423600740901	54.7650018506341	52.4223734261842	49.6821671129395
maker-tulip_contig_698_pilon_pilon-augustus-gene-3.2-mRNA-1	0	0	0	0	0	0	3.54548759376999	55.2284420971265	30.6235058733259	0.14523128669467	0	0	0.426117846998304	0	1.11288173732532	0	0	0
maker-tulip_contig_199_pilon_pilon-augustus-gene-1.1-mRNA-1	61.3433512682878	66.2731578029714	59.6252793591478	94.6254090911423	87.5135136031735	92.6348183787168	76.321285571154	90.9644928658553	63.1440430839375	95.4169553583983	117.426258209542	105.926301765526	58.5230251067471	58.8684267854279	66.8942083488875	87.6627061425344	83.6834217995968	84.8347549978696
maker-tulip_contig_402_pilon_pilon-augustus-gene-2.31-mRNA-1	16.8969710080314	12.1766946565701	20.6676581827721	8.88574681745488	7.69515378234801	8.65604040588009	3.73209220396841	4.06091486008283	5.42008953510193	10.4566526420163	11.8336539280934	16.4774247190818	15.0561639272734	13.9853720515186	17.360955102275	6.19250904318124	6.73314888042733	7.26577147501487
augustus_masked-tulip_contig_364_pilon_pilon-processed-gene-0.5-mRNA-1	206.795048983619	180.694163985692	174.570380788749	77.4603287039501	89.7541613221512	92.8261624297941	127.760712418451	157.273141158718	131.366710062265	33.6762307587601	29.8572191416511	31.029344663848	70.0054806905281	48.2295544748084	72.4029729486478	45.9271303505689	42.846873839805	26.3158387936957
maker-tulip_contig_318_pilon_pilon-augustus-gene-1.26-mRNA-1	190.458249297049	131.548225879995	162.4148713832	75.762683390931	65.4842498340987	51.7843820772827	188.657260910603	104.974649133141	160.163645762262	20.0419175638645	23.6673078561868	24.4807452969215	43.8901382408254	56.9404433526114	51.8602889593598	17.8034634991461	23.5660210814956	23.368292041264
maker-tulip_contig_196_pilon_pilon-augustus-gene-0.1-mRNA-1	4.95889366540051	9.78127931429398	4.20669148852883	9.35341770258408	6.03541473125334	5.16325217192848	7.46418440793683	5.48223506111182	6.23310296536722	9.00433977506955	11.10542907098	11.1418776671886	10.1558086867929	6.9926860257593	8.79176572487001	9.48227947237127	14.9091153780891	12.371448727728
maker-tulip_contig_114_pilon_pilon-augustus-gene-0.0-mRNA-1	142.790424781566	129.484176326733	126.008700044432	62.1082524481087	59.8516990361566	61.650749536406	34.6095570535011	44.1847841351312	32.9568544181873	244.078605044797	288.866774633331	248.989580290772	85.7207068878256	77.4190238566208	95.9548891556635	111.602559071658	183.377309758438	216.431622464531
augustus_masked-tulip_contig_351_pilon_pilon-processed-gene-1.120-mRNA-1	7.56690440794448	8.38395369796627	15.0343495807422	1.81768084020217	0	1.65983371291701	4.36654787864304	5.18578827632577	0.596209848861212	2.45586105800687	2.7417665870321	3.0161533628643	0.637046181262465	1.75816105790519	0.647697171123335	1.22495569510429	0	0.714794815379841
augustus_masked-tulip_contig_168_pilon_pilon-processed-gene-0.90-mRNA-1	97.5340918892941	100.607444375595	115.932759431256	60.9780478090465	57.0301426492956	59.8648717263507	49.2132338476295	49.6325014199323	50.24965007993	39.7803017385371	42.9343170132657	40.9707242443606	40.0195677972574	38.4597731416761	38.4155646907326	29.4686024092387	30.5155926045081	38.102098359382
augustus_masked-tulip_contig_716_pilon_pilon-processed-gene-0.0-mRNA-1	17.631621921424	19.562558628588	25.0572493012369	74.0478901454573	91.1347624419255	71.2225079010134	116.441276763814	102.9441917031	104.336723550712	96.869268225345	90.6639947106233	103.415456094046	94.8112209571227	111.882976412149	83.4661302993988	81.0831652841544	75.9883945076798	83.8509302657122
maker-tulip_contig_329_pilon_pilon-augustus-gene-0.10-mRNA-1	24.6108055986544	18.1652330122602	15.363568914627	3.27369619590443	3.168592733908	4.40395038193899	3.91869681416683	4.46700634609111	2.43904029079587	2.17846930042005	2.18467457134032	2.35391781701168	1.49141246449407	1.49843271980556	1.00159356359279	2.32219089119297	2.40469602872404	2.35646642432915
maker-tulip_contig_441_pilon_pilon-augustus-gene-10.8-mRNA-1	119.748098883005	129.552046428098	106.081785362901	116.450050397172	127.196365461164	125.892236780256	159.733546329848	175.431521955578	121.681010063038	92.2218670511156	73.5507105684575	76.2669372711784	106.245383184911	79.4169341496949	72.6711774473432	201.25654390339	160.152755513021	148.653756934764
maker-tulip_contig_468_pilon_pilon-augustus-gene-1.29-mRNA-1	72.546777697526	44.7144197224868	57.4304837999153	225.573256927319	237.040913569975	233.105649526771	222.246090746319	274.517844541599	256.099230533566	175.584625613856	176.048359207174	169.795938533776	144.311910850092	135.857899929038	133.657096652771	340.587997374968	401.103297591171	356.808291083838
augustus_masked-tulip_contig_58_pilon_pilon-processed-gene-5.51-mRNA-1	4.84685940110813	1.63487097110342	1.43210410239916	5.79600116970127	4.53561417053689	3.33181625447385	12.164754538835	4.16446818901494	4.66940713449031	9.7116161412726	13.5395206558816	12.1650472783164	24.5529103440423	20.5984551215938	29.3767392201764	41.5459302025181	21.6855487870334	35.3921619714035
maker-tulip_contig_523_pilon_pilon-augustus-gene-0.105-mRNA-1	293.493039900371	255.910205733161	243.988106334672	332.202218736778	361.068686297231	345.026733371221	375.075266498825	456.649876016314	336.316555653075	57.6568208177841	54.0706956406729	53.0416148099965	256.664983175312	161.830733739001	206.328274100114	870.047520566964	324.633963877746	530.401317676085
augustus_masked-tulip_contig_405_pilon_pilon-processed-gene-0.6-mRNA-1	0	0.199617945189673	0	0	0.150885368281334	0.151860357997896	0	0	0	0	0	0	0	0	0.111288173732532	167.971807796291	64.4458535698044	43.2018844460344
maker-tulip_contig_715_pilon_pilon-augustus-gene-1.0-mRNA-1	2.203952740178	2.39541534227608	3.65799259872072	4.52081855624897	3.47036347047067	2.73348644396213	9.33023050992103	10.3553328932112	9.75616116318347	10.0209587819322	7.64636099969112	8.16024843230716	2.05956959382514	1.99791029307409	1.89189895345304	5.611961320383	3.36657444021366	4.71293284865829
maker-tulip_contig_15_pilon_pilon-augustus-gene-1.13-mRNA-1	1922.03045216357	1536.25970617972	1747.78886366876	204.372176801462	203.544361811519	186.788240337413	188.470656300405	272.893478597566	229.269787334812	926.866071685385	896.444799106645	843.801073471454	305.668535580117	268.718934418464	281.447791369573	344.458315526957	346.276228136262	334.618232254739
augustus_masked-tulip_contig_474_pilon_pilon-processed-gene-2.27-mRNA-1	0	2.39541534227608	0	0	0	0	0	0	0	0	0	0	0	0	0	35.6069269982921	47.1320421629913	28.2775970919498
maker-tulip_contig_294_pilon_pilon-augustus-gene-1.0-mRNA-1	0	0.598853835569019	0.182899629936036	3.11780590086136	6.27381361313785	4.85953145593268	1.11962766119052	2.23350317304556	1.24120050353834	0.95126492785009	1.45644971422688	0	1.6164070329469	0.998955146537043	1.44674625852291	5.80547722798241	7.14675659736786	4.67169468623253
maker-tulip_contig_623_pilon_pilon-augustus-gene-3.34-mRNA-1	0	0	0	30.0868269433121	40.2863933311161	32.3462562535519	68.4838919428204	67.2081409343708	59.3499804093661	0	0	0	0	0	0	0	0	0
augustus_masked-tulip_contig_732_pilon_pilon-processed-gene-4.5-mRNA-1	0.367325456696334	0.798471780758692	0.182899629936036	11.379991538144	12.5234855673507	10.1746439858591	10.4498581711116	5.27918931810768	6.23310296536722	1.74277544033604	1.45644971422688	1.88313425360934	1.7754910291596	5.49425330595373	1.78061077972051	2.90273861399121	1.44281761723443	2.16009422230172
maker-tulip_contig_667_pilon_pilon-augustus-gene-0.33-mRNA-1	38.7528356814632	9.78127931429398	44.6275097043928	42.4021602517145	32.7421249170494	29.6127698095898	51.3162678045657	41.4213315728448	58.5369669791008	35.0007400934155	32.5880623558265	39.3888914713288	32.3139367307048	27.9707441030372	22.4802110939714	28.4468384171138	28.8563523446885	31.4195523243886
augustus_masked-tulip_contig_147_pilon_pilon-processed-gene-0.18-mRNA-1	6.06087003548951	6.58739219125921	5.30408926814505	27.592582222623	21.1239515593867	22.6271933416866	25.9380408175805	19.0862998423893	22.2223670939179	28.174869618766	27.8546007845891	30.4440037666844	35.9359384301903	33.4649974089909	33.6090284672246	41.4124042262745	33.1848051963918	32.7941577385806
augustus_masked-tulip_contig_414_pilon_pilon-processed-gene-0.4-mRNA-1	6.65410064805409	3.86859577777586	5.15776956419622	2.80914311667609	1.34438863138668	1.62035001983755	0.203399025116278	0	0.384826356992237	1.23010899830386	1.4983226435109	0	0	0.998955146537043	0.102385119833929	0.543779700354353	2.20270156231122	0
maker-tulip_contig_905_pilon_pilon-augustus-gene-0.62-mRNA-1	0	0	0.182899629936036	0.155890295043068	0	0	0	0	0	4.75632463925045	2.08272309134444	3.06950883338323	0	0	0	0	0	0
maker-tulip_contig_919_pilon_pilon-augustus-gene-0.0-mRNA-1	0	0	0.182899629936036	0	0	0	0	0	0	0	0	0	0	0	0	4.83789768998534	29.3372915504333	21.6009422230172
maker-tulip_contig_669_pilon_pilon-augustus-gene-2.81-mRNA-1	0	0	0	0	0	0	0	0	0	0	0	0	0	0	0	2.12867498359355	5.2903312631929	4.71293284865829
maker-tulip_contig_168_pilon_pilon-augustus-gene-1.23-mRNA-1	17.4479591930759	12.7755484921391	23.5940522617487	3.74136708103363	2.26328052422	5.01139181393058	6.71776596714314	3.4517776310704	4.06506715132645	12.1994280823523	5.4616864283508	7.53253701443738	0.213058923499152	0	0.111288173732532	0.580547722798241	0.480939205744809	0.196372202027429
maker-tulip_contig_321_pilon_pilon-augustus-gene-0.16-mRNA-1	6.42819549218585	2.39541534227608	6.5843866776973	3.4295864909475	3.92301957531467	4.85953145593268	5.59813830595262	5.68528080411596	4.06506715132645	9.00433977506955	5.09757399979408	8.63103199570949	5.61055165214434	4.49529815941669	3.33864521197595	3.28977042919003	2.40469602872404	3.53469963649372
maker-tulip_contig_632_pilon_pilon-augustus-gene-3.39-mRNA-1	38.5691729531151	49.9044862974182	30.361338569382	56.2763965105475	67.1439888851934	56.0364721012238	48.7038032617878	55.0253963541223	50.4068326764479	26.867788038514	31.859837498713	28.5608695130751	72.3690143485454	74.9216359902782	80.9065023035506	134.493555781593	197.666013561117	169.272838147644
maker-tulip_contig_360_pilon_pilon-augustus-gene-2.70-mRNA-1	0	0	0	18.395054815082	31.0823858659547	27.3348644396213	27.6174823093663	33.2995018526792	14.9052462215303	0.14523128669467	0.18205621427836	0.156927854467445	0	0	0	0.580547722798241	0	0
maker-tulip_contig_3_pilon_pilon-augustus-gene-6.15-mRNA-1	238.394221395921	298.82806394894	269.228255265845	226.820379287664	245.339608825448	223.994028046897	208.810558812033	215.634579070398	231.979832102363	265.773254651246	274.17665870321	278.546941679715	201.269663065532	194.796253574723	169.491888594646	212.867498359355	211.132311321971	236.824875645079
augustus_masked-tulip_contig_687_pilon_pilon-processed-gene-1.69-mRNA-1	131.686176225636	139.532943687581	119.06765908836	79.6599407670078	102.300279694744	91.2680751567357	127.824157985918	130.355367008659	106.233754887998	103.840369986689	80.1047342824784	87.0949592294322	101.558086867929	109.385588545806	95.4852530625123	53.9909382202364	52.903312631929	65.5883154771613
maker-tulip_contig_84_pilon_pilon-augustus-gene-0.23-mRNA-1	6.63757100250276	7.3858639720179	5.11936064190965	0	0	0	0	0	0	0	0	0	0	0	0	0.387031815198828	0	0.196372202027429
augustus_masked-tulip_contig_541_pilon_pilon-processed-gene-0.0-mRNA-1	39.1201611381596	25.7507149294678	33.2877326483586	6.70328268685192	11.4672879893813	9.11162147987378	10.2632535609131	9.94924140720293	15.1762506982854	18.5896046969178	27.308432141754	25.5792402781936	19.2463227560901	14.4848496247871	30.3816714289812	11.8044703635642	6.25220967468252	12.7641931317829
maker-tulip_contig_831_pilon_pilon-augustus-gene-0.97-mRNA-1	44.8137057169528	49.1060145166596	39.6892196961198	139.677704358589	108.486579794279	130.448047520193	132.675877851077	87.3096694917808	108.130786225283	24.1083935913153	29.4931067130943	27.9331580952053	130.534100463814	104.390812813121	103.052848876324	267.826016117589	169.771539627918	274.528338434346
augustus_masked-tulip_contig_287_pilon_pilon-processed-gene-0.24-mRNA-1	35.8142320278926	9.18242547872496	37.4944241368874	43.1816117269298	47.2271202720574	40.5467155854383	19.966693291231	20.3045743004141	27.1004476755096	28.174869618766	30.9495564273212	25.4223124237261	28.1237779018881	33.4649974089909	31.1606886451089	15.6747885155525	25.0088386987301	26.3138750716755
maker-tulip_contig_909_pilon_pilon-augustus-gene-0.31-mRNA-1	21.3048764883874	11.3782228758114	16.4609666942433	22.7599830762879	21.274836927668	17.4639411697581	18.8470656300405	14.8223392393023	21.4093536636526	21.0585365707272	27.1263759274757	20.8714046441702	66.8294823375674	70.4263378308615	56.5343922561261	32.5106724767015	42.3226501055432	49.0930505068572
augustus_masked-tulip_contig_4_pilon_pilon-processed-gene-1.59-mRNA-1	1.83662728348167	0.998089725948365	1.46319703948829	8.72985652241181	11.0146318845373	9.11162147987378	31.1629699031362	29.2385869925964	26.2874342452444	8.71387720168021	9.46692314247472	9.57259912251417	25.4960511787319	18.9801477842038	28.7123488229932	61.731574524213	38.4751364595847	78.1561364069167
maker-tulip_contig_776_pilon_pilon-augustus-gene-0.21-mRNA-1	0.183662728348167	0.598853835569019	0.548698889808108	33.3605231392166	48.4342032183081	47.8360127693374	100.206675676552	92.3858130668843	87.2634415151411	0.14523128669467	0.36411242855672	0.313855708934891	0.497137488164689	0.998955146537043	1.00159356359279	33.2847361070992	27.4135347274541	26.9029916777578
augustus_masked-tulip_contig_550_pilon_pilon-processed-gene-0.21-mRNA-1	12.4890655276754	13.7736382180874	11.1568774260982	11.535881833187	11.9199440942253	11.5413872078401	6.53116135694472	7.91878397716151	6.50410744212231	14.523128669467	12.3798225709285	13.9665790476026	18.1810281385943	19.9791029307409	21.2560411829136	10.2563431027689	12.0234801436202	15.3170317581395
augustus_masked-tulip_contig_224_pilon_pilon-processed-gene-1.3-mRNA-1	0	0	0	3.4295864909475	6.03541473125334	2.12604501197055	0	0.406091486008283	0	0.14523128669467	0.18205621427836	0	0.426117846998304	0.499477573268521	0.779017216127722	0.387031815198828	0.480939205744809	0.981861010137145
maker-tulip_contig_394_pilon_pilon-augustus-gene-3.22-mRNA-1	122.503039808227	64.676214241454	90.90111607821	125.647577804713	141.228704711328	129.688745730203	93.3023050992103	100.710688530054	62.0600251769171	74.2131875009765	64.4478998545395	72.5006687639598	78.8318016946863	72.4242481239356	68.5535150192396	112.626258222859	81.7596649766175	71.2831093359567
maker-tulip_contig_59_pilon_pilon-augustus-gene-2.64-mRNA-1	350.795811144999	471.038465264071	456.400420557187	49.0867361031613	47.5786831801529	55.4199190477523	100.529501652195	87.7177914352191	111.586093303911	68.5738566386224	71.4661669149702	72.1256111917826	170.884619788907	148.504672084197	160.024603655219	21.8460108088978	21.7095957473207	18.9106430552414
maker-tulip_contig_236_pilon_pilon-augustus-gene-8.17-mRNA-1	1165.52367409747	1606.52522288649	1508.37324808249	650.062530329594	409.352004147258	414.275056618261	275.988218483464	228.223415136655	231.979832102363	232.950983858251	194.25398063501	207.144767897028	248.639763723511	237.751324875816	421.003161230168	530.040070914794	433.326224376073	822.799526494927
maker-tulip_contig_387_pilon_pilon-augustus-gene-1.54-mRNA-1	35.9978947562407	23.7545354775711	32.0074352388063	10.4446497678856	9.20400746516134	10.326504343857	10.2632535609131	10.9644701222236	15.1762506982854	30.9342640659648	34.4086244986101	37.348829363252	9.51663191629546	8.49111874556486	9.7933592884628	18.7710430371431	15.8709937895787	15.9061483642217
maker-tulip_contig_81_pilon_pilon-augustus-gene-4.12-mRNA-1	29.3860365357067	40.1232069831243	25.423048561109	129.388944885746	113.767567684125	129.23316465621	137.340993106038	97.0558651559796	139.83831000563	108.923465021003	113.967190138253	114.714261615703	99.5695369152705	82.413799589306	92.2578960242688	205.513893870577	180.833141360048	209.529139563267
maker-tulip_contig_58_pilon_pilon-augustus-gene-1.0-mRNA-1	424.444565212614	369.293198600895	382.443126196252	86.6750040439458	97.0192918048975	93.0903994527105	78.1873316731382	80.0000227436317	91.3285086664675	166.580285838787	183.694720206865	171.36521707845	157.308505183541	132.361556916158	188.633454476641	65.6018926762013	79.8359081536383	62.249988042695
maker-tulip_contig_56_pilon_pilon-augustus-gene-0.35-mRNA-1	0	0	0	22.7599830762879	18.10624419376	24.7532383536571	31.1629699031362	25.3807178755177	21.9513626171628	16.9920605432764	13.4721598565986	14.7512183199399	35.2257420185265	25.4733562366946	34.3880456833523	80.3091016537567	35.1085620193711	121.947137459033
augustus_masked-tulip_contig_290_pilon_pilon-processed-gene-5.55-mRNA-1	0	0.798471780758692	0	0	0	0	0	0	0	0.14523128669467	0	0	0	0	0.111288173732532	71.4073699041837	126.00607190514	82.869069255575
maker-tulip_contig_284_pilon_pilon-augustus-gene-2.17-mRNA-1	31.0390010908402	26.5491867102265	27.6178441203415	2.96191560581829	3.31947810218934	5.46697288792427	2.98567376317473	4.67005208909525	4.33607162808154	3.34031959397741	2.00261835706196	4.39397992508847	9.51663191629546	9.98955146537043	12.352987284311	1.3546113531959	0.961878411489618	1.57097761621943
maker-tulip_contig_407_pilon_pilon-augustus-gene-9.187-mRNA-1	3.48959183861517	7.3858639720179	5.85278815795316	2.49424472068909	1.65973905109467	3.49278823395162	3.17227837337315	5.48223506111182	4.60707610483664	2.17846930042005	2.91289942845376	2.51084567147913	5.75259093447711	3.49634301287965	5.00796781796393	2.12867498359355	2.40469602872404	3.92744404054858
maker-tulip_contig_465_pilon_pilon-augustus-gene-0.80-mRNA-1	0	0	0	156.351730316396	95.9615853732453	133.351617565113	501.589460121151	2027.95184557274	394.512056991464	19.0775818202119	17.4701143221514	20.0208556729567	0.0710196411663841	0	0.111288173732532	0.193515907599414	0	0
augustus_masked-tulip_contig_66_pilon_pilon-processed-gene-3.7-mRNA-1	0	0	0	5.6603766130138	2.72197204379526	0.0804859897388851	0	0.828426631456897	0	0.769725819481752	1.06502885352841	2.45278236532617	5.32292210542049	8.99059631883338	8.45011103151114	0	0	0.60875382628503
maker-tulip_contig_448_pilon_pilon-augustus-gene-2.10-mRNA-1	182.560751978078	242.136567515073	225.515243711133	65.6298142131316	51.9045666887787	63.1739089271249	55.2349646187325	55.8375793261389	61.789020700162	63.0303784254869	74.0968792112925	73.4422358907644	51.0631219986301	48.9488021803151	53.6408997390803	51.4752314214441	51.4604950146946	62.8391046487773
maker-tulip_contig_126_pilon_pilon-augustus-gene-1.30-mRNA-1	270.53519885685	190.435519710948	291.907809377914	362.28904568009	515.575303417317	442.52108320587	603.479309381692	844.26419941122	506.77837153203	1968.31962857287	2555.70513603962	2128.41249014196	514.324241326953	564.409657793429	674.406332819142	867.918845583371	1807.36953518899	1488.50129136791
maker-tulip_contig_2_pilon_pilon-augustus-gene-6.16-mRNA-1	5.03419538402326	7.80705783636811	1.53086990256462	2.92761974090882	0.985281454877108	2.71981901174232	1.03378954049925	1.54720856169156	1.58266614424976	2.66935104944804	6.54674146544983	7.31911513236165	3.2171897448372	2.12277968639122	3.27632383468574	11.3168102764137	10.3209553552836	10.8947297684818
maker-tulip_contig_43_pilon_pilon-augustus-gene-1.8-mRNA-1	32.5083029176256	58.2884399953845	51.9434949018343	53.4703711997723	66.0877913072241	54.5178685212448	12.5025088832942	5.8883265471201	7.8591298258978	9.58526492184823	8.37458585680456	10.6710941037863	4.04811954648389	3.49634301287965	4.78539147049887	6.57954085838007	5.77127046893771	7.85488808109716
augustus_masked-tulip_contig_61_pilon_pilon-processed-gene-0.71-mRNA-1	0	0	0	0	0	0	0	0	0	0	0	0	0	0	0	127.720499015613	171.214357245152	121.161648650924
maker-tulip_contig_505_pilon_pilon-augustus-gene-3.103-mRNA-1	0.183662728348167	0	0	32.4251813689581	28.969990710016	30.0683508835835	64.751799738852	33.5025475956833	59.3499804093661	48.0715558959358	41.3267606411877	39.7027471802637	54.3300254922838	56.4409657793429	54.197340607743	160.811719215113	218.827338613888	189.695547158496
maker-tulip_contig_637_pilon_pilon-augustus-gene-1.21-mRNA-1	0	0	0	0	0	0	0	0	0	0	0	0	0	0	0	1.93515907599414	8.17596649766175	4.71293284865829
maker-tulip_contig_677_pilon_pilon-augustus-gene-0.4-mRNA-1	85.9541568669422	93.421198348767	88.7063205189775	21.9805316010726	19.7659832448547	22.3234726256908	17.1676241382547	19.4923913283976	16.2602686053058	30.0628763457967	30.9495564273212	25.2653845692587	36.2200169948559	31.4670871159168	43.8475404506175	29.8014497703097	25.9707171102197	24.742897455456
augustus_masked-tulip_contig_270_pilon_pilon-processed-gene-1.91-mRNA-1	0.183662728348167	0.598853835569019	0	0	0	0	0	0	0	0	0	0	0	0.998955146537043	0	62.3121222470112	92.8212667087481	61.0717548305304
maker-tulip_contig_557_pilon_pilon-augustus-gene-0.4-mRNA-1	124.706992548405	107.793690402423	104.618588323413	79.8158310620508	86.1555452886414	83.8269176148388	69.7901242142093	69.4416441074164	66.3960968049986	38.1958284006983	39.3241422841258	35.3087672551752	46.5178649639816	36.9613404218706	40.8427597598392	56.3131291114294	48.0939205744809	43.2018844460344
maker-tulip_contig_237_pilon_pilon-augustus-gene-0.41-mRNA-1	40.4058002365968	105.198657114958	79.3784393922397	72.8007677851128	80.2710159256694	90.812494082742	79.4935639445272	81.6243886876648	74.7972355844066	155.542708049992	128.167574851965	146.884471781529	74.6416428658697	78.4179790031578	69.1099558879022	68.3111153825931	76.4693337134246	66.373804285271
augustus_masked-tulip_contig_536_pilon_pilon-processed-gene-0.18-mRNA-1	3.48959183861517	6.4736099625011	5.85461715425252	0	1.05619757796933	0.836750572568409	0.656848227898441	1.22030491545489	2.98104924430606	2.83781934201386	3.00028641130737	3.13855708934891	0	0	1.09396274779079	1.41266612547572	1.44281761723443	0.93865912569111
maker-tulip_contig_677_pilon_pilon-augustus-gene-0.6-mRNA-1	130.400537127199	65.2750680770231	165.524165092113	40.8432573012838	41.3425909090854	47.8360127693374	81.5462146567098	90.5584013798471	93.4965444805083	97.8858872322077	85.3843644965509	96.0398469340766	126.48598091733	136.856855075575	119.968651283669	23.8024566347279	39.4370148710743	39.8635570115681
maker-tulip_contig_667_pilon_pilon-augustus-gene-0.13-mRNA-1	4.30138109791407	4.64910194346748	5.96801492481286	11.0884766864134	6.44582293297857	7.8177712297317	8.93649478240236	4.64162568507467	4.77238883565725	15.6617419571532	14.0875098608595	11.3411760423623	4.99481136323179	5.13962422893308	5.49541001891242	10.7130406447035	8.24329798646603	14.7200602639761
augustus_masked-tulip_contig_72_pilon_pilon-processed-gene-0.9-mRNA-1	165.480118241699	98.4116469785088	123.274350576888	55.9646159204614	63.0700839415974	61.503444989148	95.1683512011945	120.60917134446	102.981701166937	30.6438014925754	28.2187132131458	31.699426602424	86.0047854524911	74.4221584170097	88.8079626385603	11.223922640766	14.9091153780891	13.1569375358377
maker-tulip_contig_702_pilon_pilon-augustus-gene-0.64-mRNA-1	57.3027712446281	76.6532909528344	61.8200749183802	38.8166834657239	36.8160298606454	38.2688102154699	63.6321720776614	68.4264153923956	63.4150475606926	37.3244406805302	50.9757399979408	38.9181079079264	107.807815290571	81.9143220160375	109.618851126544	32.8977042919003	29.3372915504333	31.4195523243886
augustus_masked-tulip_contig_515_pilon_pilon-processed-gene-1.23-mRNA-1	0	0	0	297.594573237217	547.563001492959	421.716214160158	2265.00675858843	1501.11920848705	908.136001606328	70.8728679069991	47.6987281409303	37.5057572177194	0	0	0	0	0	0
augustus_masked-tulip_contig_309_pilon_pilon-processed-gene-0.79-mRNA-1	0	0	0	6.70328268685192	12.0708294625067	8.2004593318864	9.89004434051629	5.48223506111182	8.67214325616309	1.01661900686269	2.00261835706196	3.13855708934891	10.2268283279593	12.486939331713	15.691632496287	171.068062317882	236.622089226446	188.517313946332
augustus_masked-tulip_contig_441_pilon_pilon-processed-gene-6.13-mRNA-1	0	0	0	4.20903796616284	2.715936629064	5.31511252992637	0.933023050992103	1.82741168703727	0.813013430265289	0.435693860084011	0.36411242855672	0.941567126804672	0.284078564665536	0.499477573268521	0.111288173732532	1.74164316839472	2.88563523446885	2.94558303041143
augustus_masked-tulip_contig_217_pilon_pilon-processed-gene-2.5-mRNA-1	6.61185822053401	3.79274095860379	4.20669148852883	6.23561180172272	3.77213420703334	6.22627467791375	10.4498581711116	7.51269249115323	7.5881253491427	7.55202690812285	5.27963021407244	5.33554705189314	7.95419981063502	8.49111874556486	10.0159356359279	12.9655658091607	13.4662977608547	13.3533097378652
maker-tulip_contig_827_pilon_pilon-augustus-gene-2.100-mRNA-1	0	0	0.548698889808108	686.384969074628	342.208015262064	428.701790628061	2016.63602241433	2150.05137267085	1831.17724943419	254.590445575757	181.874158064082	164.774247190818	167.464313870334	162.829688885538	171.606363895564	465.212241868991	486.710476213747	875.820021042333
maker-tulip_contig_318_pilon_pilon-augustus-gene-3.7-mRNA-1	0	0	0	0	0	0	0	0	0.271004476755096	0	0	0.156927854467445	0.497137488164689	1.99791029307409	1.55803443225544	3.67680224438886	9.13784490915137	4.32018844460344
augustus_masked-tulip_contig_531_pilon_pilon-processed-gene-4.5-mRNA-1	4.77523093705234	1.39732561632771	4.02379185859279	3.4295864909475	4.37567568015867	6.22627467791375	6.90437057734156	5.27918931810768	4.33607162808154	3.19508830728274	2.00261835706196	3.13855708934891	1.7754910291596	2.99686543961113	2.89349251704583	3.87031815198828	1.92375682297924	2.749210828384
maker-tulip_contig_381_pilon_pilon-augustus-gene-0.146-mRNA-1	6.79552094888218	5.1900665749315	3.84089222865676	5.30027003146431	6.63895620437868	4.2520900239411	5.4115336957542	5.8883265471201	4.06506715132645	8.42341462829087	6.55402371402096	6.43404203316526	9.87173012212738	9.98955146537043	7.67888398754469	6.9665726735789	5.2903312631929	3.33832743446629
maker-tulip_contig_491_pilon_pilon-augustus-gene-1.66-mRNA-1	112.061813701634	101.080538905695	90.7986922854458	17.7340799640994	25.5931761678798	18.5937822332624	19.7427677589929	32.4020396686009	29.2197026837345	32.562306789812	38.7288184634355	28.9265114139842	100.924591668725	107.387678252732	120.085503866088	21.9369632854695	20.6226731423374	13.9777733403124
maker-tulip_contig_671_pilon_pilon-augustus-gene-0.52-mRNA-1	208.273533946821	187.241632587913	199.360596630279	78.2569281116201	69.4072694094134	82.7638951088535	117.187695204608	115.939119255365	106.504759364753	42.9884608616224	40.962648212631	48.6476348849081	82.7378819588374	76.9195462833523	94.0385068039893	39.6707610578798	47.6129813687361	49.0930505068572
maker-tulip_contig_236_pilon_pilon-augustus-gene-7.77-mRNA-1	1252.9471327912	1474.37814317092	1411.43644421639	582.562032575945	655.747810550676	657.099769056897	826.658423179003	905.990105284479	807.322336253432	940.0821187746	924.299399891234	913.477040854999	798.260766710157	799.164117229634	685.646438366128	601.447440818978	677.643340894436	574.977807536312
maker-tulip_contig_320_pilon_pilon-augustus-gene-2.16-mRNA-1	180.724124694596	120.170003004183	133.150930593434	103.511155908597	110.146318845373	101.898300216588	19.4068794606357	62.9441803312838	19.783326803122	171.082455726321	147.465533565472	159.752555847859	96.160594139284	130.363646623084	165.70809068774	313.49577031105	543.942241697379	480.130033957064
maker-tulip_contig_305_pilon_pilon-augustus-gene-0.1-mRNA-1	0	0	0	187.380134641768	98.8299162242735	252.6956357085	258.074175904416	183.756397418748	230.082800765077	0	0	0.313855708934891	10.4398872514585	5.99373087922226	9.68207111473026	17.8034634991461	37.9941972538399	29.2594581020869
augustus_masked-tulip_contig_735_pilon_pilon-processed-gene-0.6-mRNA-1	0.183662728348167	0	0	0	0.150885368281334	0.759301789989482	0	0	0	0	0	0	0	0	1.33545808479038	4620.3858098436	5951.14173188627	6736.74476275298
maker-tulip_contig_693_pilon_pilon-augustus-gene-1.8-mRNA-1	109.095660638811	86.4345702671284	79.7442386521117	133.286202261823	124.631314200381	135.763160050119	60.4598937042883	62.1319973592673	73.171208723876	133.322321185707	126.347012709182	144.530553964517	120.307272135855	84.9111874556486	126.534653533889	214.802657435349	139.472369665995	269.029916777578
augustus_masked-tulip_contig_583_pilon_pilon-processed-gene-2.27-mRNA-1	0	0.598853835569019	0	36.1665484499918	32.2894688122054	32.9536976855435	8.39720745892893	8.93401269218222	8.13013430265289	5.95448275448148	6.91813614257768	8.94488770464439	2.91180528782175	3.49634301287965	4.45152694930127	16.6423680535496	13.9472369665995	12.371448727728
augustus_masked-tulip_contig_907_pilon_pilon-processed-gene-8.43-mRNA-1	0	0	0	0	0	0	0	0	0	0	0	0	0	0	0	3.87031815198828	3.84751364595847	1.76734981824686
maker-tulip_contig_773_pilon_pilon-augustus-gene-1.44-mRNA-1	42.9770784334711	30.54154561402	43.3472122948406	183.794657855777	132.779124087574	175.246853129572	253.409060649455	170.964515609487	209.215456054934	248.78119410797	246.140001704343	268.503558993799	178.614397533456	166.326031898418	140.111810729257	266.084372949194	228.927061934529	310.464451405365
augustus_masked-tulip_contig_126_pilon_pilon-processed-gene-1.3-mRNA-1	1.6529645551335	3.59312301341411	1.82899629936036	0.623561180172272	0.301770736562667	0.455581073993689	0.373209220396841	0.203045743004141	0	1.30708158025203	0.72822485711344	0.470783563402336	0.994274976329377	0.499477573268521	1.22416991105785	108.368908255672	175.06187089111	119.590671034704
augustus_masked-tulip_contig_247_pilon_pilon-processed-gene-2.172-mRNA-1	0	0.199617945189673	0	4.20903796616284	1.65973905109467	4.85953145593268	33.0290160051204	16.8527966693437	17.3442865123262	7.98772076820686	7.2822485711344	9.72952697698161	9.51663191629546	6.49320845249078	3.67250973317355	17.2229157763478	12.9853585551098	9.81861010137145
augustus_masked-tulip_contig_515_pilon_pilon-processed-gene-1.14-mRNA-1	0	0	0	157.293307698456	183.195961045098	201.123858132414	302.709998663878	318.229532095531	88.0791649901739	0.14523128669467	0	0	0	0	0	0	0	0
maker-tulip_contig_360_pilon_pilon-augustus-gene-0.30-mRNA-1	39.4874865948559	31.739253285158	31.0929370891261	9.66519829267022	9.80754893828668	11.0858061338464	12.875718103691	13.6040647812775	16.802277558816	24.9797813114833	21.6646894991249	22.911466752247	18.6071459855926	13.9853720515186	17.4722432760075	10.8368908255672	13.9472369665995	11.9787043236732
maker-tulip_contig_420_pilon_pilon-augustus-gene-2.81-mRNA-1	8.26482277566752	1.19770767113804	2.74349444904054	170.388092482073	59.5997204711267	44.4950848933836	141.446294530403	129.137092550634	131.437171226222	35.0007400934155	32.2239499272697	36.2503343819799	33.3792313482005	26.4723113832316	19.4754304031931	74.8906562409731	88.4928138570449	107.611966711031
augustus_masked-tulip_contig_410_pilon_pilon-processed-gene-0.0-mRNA-1	1.46930182678534	11.577840821001	0.182899629936036	2.49424472068909	0.603541473125334	1.21488286398317	5.03832447535736	9.54314992119465	6.77511191887741	37.7601345406143	58.6221009976319	62.6142139325107	11.647221151287	7.49216359902782	9.01434207233507	28.059806601915	24.5278994929853	17.4771259804412
maker-tulip_contig_33_pilon_pilon-augustus-gene-0.78-mRNA-1	2.75494092522251	1.19770767113804	2.74349444904054	3.58547678599056	6.48807083609734	4.85953145593268	3.35888298357157	2.63959465905384	1.62602686053058	4.50216988753478	4.73346157123736	3.4524127982838	6.6758462696401	10.4890290386389	5.00796781796393	4.2573499671871	6.25220967468252	4.32018844460344
maker-tulip_contig_674_pilon_pilon-augustus-gene-8.49-mRNA-1	4.59156820870418	2.79465123265542	3.47509296878469	11.535881833187	9.95843430656801	11.2376664918443	11.5694858323021	7.30964674814909	7.04611639563251	6.39017661456549	6.18991128546424	10.2003105403839	9.94274976329377	7.49216359902782	8.68047755113748	6.9665726735789	7.21408808617213	12.5678209297555
maker-tulip_contig_759_pilon_pilon-augustus-gene-0.40-mRNA-1	186.234006545041	203.011450257897	200.27509477996	157.605088288542	131.421155773042	145.482222961985	115.694858323021	98.0710938710003	91.8705176199777	195.771774464415	247.59645141857	264.580362632113	152.976307072391	146.846406540945	130.874892309457	223.704389184922	208.246676087502	263.335122918782
augustus_masked-tulip_contig_144_pilon_pilon-processed-gene-0.3-mRNA-1	7.53017186227485	10.380133149863	5.66988852801712	0	0.301770736562667	0.151860357997896	0.746418440793682	0.609137229012424	0.271004476755096	0.14523128669467	0.36411242855672	0.156927854467445	0.284078564665536	0.499477573268521	0	0.387031815198828	0	0.196372202027429
augustus_masked-tulip_contig_657_pilon_pilon-processed-gene-0.9-mRNA-1	0	0	0	0.467670885129204	0.150885368281334	0.303720715995793	0.559813830595262	0.203045743004141	0.542008953510193	1.88800672703071	0	0.156927854467445	2.48568744082344	1.99791029307409	3.44993338570848	5.80547722798241	8.65690570340656	11.5859599196183
maker-tulip_contig_774_pilon_pilon-augustus-gene-0.111-mRNA-1	63.730966736814	77.4517627335931	55.9672867604271	219.805316010726	245.49049419373	233.86495131676	180.81986728227	170.15233263747	171.545833785976	226.99650110377	236.308966133311	216.403511310607	74.8547017893688	61.4357415120281	102.273831660197	96.9514697073063	73.102759273211	81.1017194373281
maker-tulip_contig_178_pilon_pilon-augustus-gene-0.52-mRNA-1	0.552824812327983	0.798471780758692	0.182899629936036	19.0186159952543	22.4819198739187	17.6795828781151	3.91869681416683	5.68528080411596	2.16803581404077	7.98772076820686	4.91551778551572	6.83734661914659	1.42039282332768	0.499477573268521	1.11288173732532	7.57227746436506	10.6624221913624	6.67665486893258
maker-tulip_contig_855_pilon_pilon-augustus-gene-2.13-mRNA-1	1.28563909843717	0.399235890379346	0.365799259872072	39.9079155310254	47.0762349037761	44.4950848933836	15.1149734260721	12.7918818092609	13.5502238377548	0.871387720168021	0.9102810713918	1.88313425360934	1.63345174682683	1.49843271980556	4.22895060183621	3.48328633678945	3.36657444021366	4.32018844460344
maker-tulip_contig_190_pilon_pilon-augustus-gene-0.9-mRNA-1	45.6089653307003	47.0160146305237	47.6307216279425	30.2645418796612	26.9858481171165	31.1344105967287	36.268472038165	37.0741222151262	34.2766462199846	28.6265389203864	31.0660724044594	29.086577825541	28.0030445119052	21.7572430915768	29.4802372217477	41.6310772018619	43.1113904029647	50.2496827767988
augustus_masked-tulip_contig_29_pilon_pilon-processed-gene-1.0-mRNA-1	1.101976370089	3.39350506822444	2.56059481910451	13.4065653737038	7.54426841406668	10.0227836278612	11.7560904425005	5.07614357510353	7.04611639563251	24.9797813114833	24.0314202847435	28.5608695130751	15.6243210566045	10.9885066119075	11.0175291995206	21.6737816511343	19.7185074355372	20.61908121288
augustus_masked-tulip_contig_104_pilon_pilon-processed-gene-0.16-mRNA-1	48.3032975555679	36.5300839697102	42.2498145152243	46.7670885129204	55.5258155275307	50.2657784973037	53.1823139065499	41.4213315728448	50.1358281996928	54.8974263705853	58.2579885690752	56.1801718993454	72.0139161427134	79.4169341496949	64.7697171123335	31.1560611235056	34.6276228136262	31.8122967284435
maker-tulip_contig_354_pilon_pilon-augustus-gene-0.57-mRNA-1	20.5702255749947	27.3476584909852	25.423048561109	62.9796791973995	60.5050326808147	59.5292603351754	50.0100355331767	32.2842731376585	43.3607162808154	102.968982266521	114.513358781088	104.984734638721	49.7137488164689	34.463952555528	49.189372789779	148.039669313552	127.929828728119	153.759434187477
augustus_masked-tulip_contig_777_pilon_pilon-processed-gene-0.25-mRNA-1	0	0.798471780758692	0.548698889808108	15.7449197993499	11.769058725944	16.097197947777	6.71776596714314	3.85786911707869	9.21415220967328	4.35693860084011	1.09233728567016	1.09849498127212	1.63345174682683	0	1.22416991105785	2.51570679879238	1.92375682297924	2.55283862635658
maker-tulip_contig_149_pilon_pilon-augustus-gene-0.7-mRNA-1	78.5966279693146	44.1155658869177	75.1717479037108	105.36625041961	79.6674744525441	73.3318482736042	101.497979579125	77.072103129512	77.4774698595145	150.638247498313	194.689094987135	183.82685800171	409.493569394077	419.061683972289	360.572570011666	1082.71956785964	1709.7388764228	1254.22532690515
maker-tulip_contig_504_pilon_pilon-augustus-gene-2.32-mRNA-1	16.8969710080314	19.4926923477716	19.0215615133478	6.23561180172272	6.65102703384118	7.13743682590113	2.23925532238105	2.03045743004141	3.66669057049645	4.64740117422945	5.89133909404773	6.74789774210015	3.5509820583192	1.99791029307409	6.00956138155671	3.89934553812819	5.2903312631929	5.89116606082287
maker-tulip_contig_468_pilon_pilon-augustus-gene-3.89-mRNA-1	17.0806337363795	14.3724920536565	23.5940522617487	15.4331392092637	11.9199440942253	12.7562700718233	13.4355319342863	12.7918818092609	12.1952014539793	20.1871488505592	19.6620711420629	24.4807452969215	20.524676297085	24.9738786634261	29.713942386586	14.3201771623566	14.4281761723443	17.4771259804412
augustus_masked-tulip_contig_426_pilon_pilon-processed-gene-1.9-mRNA-1	4.22424275200784	4.39159479417281	6.95018593756937	72.3330968999836	82.8360671864521	76.6894807889377	42.5458511252399	36.3451879977413	29.5394879663055	0.435693860084011	1.27439349994852	0.784639272337227	28.9049939547183	32.4660422624539	24.2608218736919	14.9007248851549	11.5425409378754	12.1750765257006
maker-tulip_contig_407_pilon_pilon-augustus-gene-0.59-mRNA-1	0	0	0	0	0	0	0	0	0	0	0	0	0	0	0	20.125654390339	27.4135347274541	10.4077267074537
maker-tulip_contig_168_pilon_pilon-augustus-gene-0.51-mRNA-1	78.2403222763192	59.6857656117122	55.4185878706189	31.4898395986997	29.42264681486	32.194395895554	42.9190603456367	37.360416712762	40.1086625597543	53.735576077028	43.5114352125281	45.9798613589615	65.7641877200716	54.4430554862688	61.9875127690202	73.3425289801778	52.903312631929	74.2286923663681
maker-tulip_contig_860_pilon_pilon-augustus-gene-6.20-mRNA-1	3.48959183861517	5.58930246531084	4.38959111846487	37.7254514004225	44.6620690112747	42.8246209554068	9.51683512011945	8.3248754631698	8.40113877940799	4.93786374761879	6.3719674997426	5.1786191974257	54.0459469276183	46.950891887241	45.8507275778031	74.3101085181749	85.607178622576	78.745253012999
augustus_masked-tulip_contig_44_pilon_pilon-processed-gene-6.11-mRNA-1	0	0	0	3.74136708103363	7.99692451891068	5.16325217192848	11.3828812221037	21.3198030154348	5.14908505834683	2.32370058711472	2.00261835706196	1.56927854467445	0.284078564665536	0	0.333864521197595	1.16109544559648	4.80939205744809	5.10567725271315
maker-tulip_contig_451_pilon_pilon-augustus-gene-1.35-mRNA-1	3.48959183861517	1.59694356151738	3.47509296878469	0.311780590086136	0.150885368281334	0.151860357997896	0.373209220396841	0.609137229012424	0.813013430265289	7.69725819481752	6.00785507118588	6.43404203316526	0.994274976329377	0.499477573268521	0.222576347465064	4.06383405958769	2.40469602872404	2.94558303041143
augustus_masked-tulip_contig_112_pilon_pilon-processed-gene-2.51-mRNA-1	0.183662728348167	0	0	54.0892556710933	24.9232451327107	61.8071657051438	37.1343174294857	105.760436158567	39.0246446527339	1.59754415364137	13.7852965451574	4.39397992508847	0.35509820583192	0	0.111288173732532	0.774063630397655	0.961878411489618	0.589116606082287
maker-tulip_contig_372_pilon_pilon-augustus-gene-0.1-mRNA-1	54.1805048627093	54.2960810915911	39.3234204362478	13.4065653737038	10.411090411412	15.3378961577875	16.9810195280563	14.0101562672858	12.1952014539793	60.4162152649828	43.8755476410848	57.2786668806175	14.5590264391087	12.486939331713	15.3577679750894	25.737615710722	11.5425409378754	13.5496819398926
augustus_masked-tulip_contig_407_pilon_pilon-processed-gene-1.22-mRNA-1	1.6529645551335	0.598853835569019	1.82899629936036	9.04163711249794	5.58275862640934	12.1488286398317	16.9810195280563	10.3553328932112	10.5691745934488	10.0209587819322	14.9286095708255	14.437362611005	7.59910160480309	3.99582058614817	7.23373129261456	4.45086587478652	0.961878411489618	1.96372202027429
augustus_masked-tulip_contig_839_pilon_pilon-processed-gene-0.1-mRNA-1	14.6930182678534	8.38395369796627	22.8624537420045	13.8742362588331	14.6358807232894	8.2004593318864	13.4355319342863	9.94924140720293	17.0732820355711	87.4292345901915	95.033343853304	110.947993108484	15.8373799801036	14.4848496247871	15.914208843752	15.2877567003537	19.7185074355372	15.7097761621943
augustus_masked-tulip_contig_714_pilon_pilon-processed-gene-0.91-mRNA-1	46.6503330004344	51.1021939685563	42.2498145152243	13.5624556687469	11.769058725944	11.693247565838	7.65078901813524	9.94924140720293	7.04611639563251	29.7724137724074	27.6725445703107	25.736168132661	40.6232347471717	40.4576834347502	44.9604221879428	19.9321384827396	16.8328722010683	23.368292041264
augustus_masked-tulip_contig_673_pilon_pilon-processed-gene-0.19-mRNA-1	9.55046187410469	14.5721099988461	11.5226766859703	2.02657383555988	1.05619757796933	1.82232429597476	1.11962766119052	1.42132020102899	0.271004476755096	3.48555088067208	2.7308432141754	3.60934065275124	3.26690349365367	2.99686543961113	2.22576347465064	3.09625452159062	0.961878411489618	2.55283862635658
maker-tulip_contig_603_pilon_pilon-augustus-gene-3.39-mRNA-1	358.509645735622	328.770755727391	338.913014271475	52.690919724557	61.4103448905027	66.8185575190744	71.8427749263919	61.1167686442466	53.1168774439989	73.1965684941138	55.8912577834565	59.1618011342269	74.6416428658697	77.9185014298893	81.4629431722132	53.0233586822394	47.1320421629913	39.0780682034584
augustus_masked-tulip_contig_20_pilon_pilon-processed-gene-0.9-mRNA-1	70.7101504140443	83.2406831440936	75.5375471635829	28.3720336978384	37.4195713337707	35.0797426975141	42.1726419048431	33.7055933386875	27.6424566290198	66.2254667327696	62.4452814974775	65.4389153129247	52.9096326689561	47.4503694605095	53.7521879128128	73.9230767029761	46.6511029572465	54.5914721636252
maker-tulip_contig_456_pilon_pilon-augustus-gene-1.13-mRNA-1	1.46930182678534	2.1957973970864	0.731598519744144	3.74136708103363	4.52656104844001	5.46697288792427	3.35888298357157	1.21827445802485	5.69109401185703	3.48555088067208	2.18467457134032	3.76626850721869	2.48568744082344	1.49843271980556	2.1144753009181	1.54812726079531	2.40469602872404	2.16009422230172
augustus_masked-tulip_contig_407_pilon_pilon-processed-gene-3.63-mRNA-1	30.4880129057957	17.7659971218809	34.7509296878469	19.4862868803835	22.180149137356	21.1085897617076	16.7944149178579	12.3857903232526	12.7372104074895	38.1958284006983	40.4164795697959	37.348829363252	24.2887172789034	23.974923516889	29.6026542128534	30.7690293083068	37.0323188423503	32.7941577385806
augustus_masked-tulip_contig_666_pilon_pilon-processed-gene-2.62-mRNA-1	0.734650913392668	1.19770767113804	0.548698889808108	5.30027003146431	5.88452936297201	4.40395038193899	3.35888298357157	1.42132020102899	3.52305819781625	5.08309503431346	3.6411242855672	5.1786191974257	3.40894277598644	4.49529815941669	3.78379790690608	2.51570679879238	0.480939205744809	3.73107183852115
augustus_masked-tulip_contig_555_pilon_pilon-processed-gene-1.37-mRNA-1	212.681439427177	214.788909024088	201.738291819448	78.4128184066632	79.3657037159814	79.2711068749019	90.8764451666308	90.7614471228512	84.8244012243452	186.767434689346	194.800149277845	198.513735901318	253.682158246324	219.770132238149	167.266125119995	306.335681729872	184.199715800262	152.384828773285
augustus_masked-tulip_contig_571_pilon_pilon-processed-gene-0.5-mRNA-1	1.46930182678534	1.19770767113804	1.28029740955225	140.301265538761	97.1701771731788	121.488286398317	53.5555231269467	32.4873188806626	121.952014539793	13.9422035226883	6.00785507118588	5.96325846976292	8.4513372987997	8.49111874556486	5.89827320782418	24.9635520803244	47.6129813687361	40.2563014156229
augustus_masked-tulip_contig_474_pilon_pilon-processed-gene-2.29-mRNA-1	0.367325456696334	0.199617945189673	0	0.155890295043068	0	0.151860357997896	0	0	0	0	0	0	0.284078564665536	0	0	76.8258153169673	100.99723320641	63.0354768508047
maker-tulip_contig_200_pilon_pilon-augustus-gene-0.8-mRNA-1	3.48959183861517	4.39159479417281	2.37769518916847	0	0	0.303720715995793	0.186604610198421	0	0	0.14523128669467	0	0.313855708934891	15.1982032096062	24.4744010901575	19.5867185769256	0.193515907599414	0	0.392744404054858
augustus_masked-tulip_contig_323_pilon_pilon-processed-gene-4.26-mRNA-1	0	0	0	29.6191560581829	22.4819198739187	23.6902158476718	41.9860372946446	39.5939198858076	23.3063850009383	21.9299242908952	8.92075449963964	13.3388676297329	9.65867119862823	6.9926860257593	10.7949528520556	16.2553362383508	16.3519329953235	27.8848526878949
maker-tulip_contig_559_pilon_pilon-augustus-gene-2.57-mRNA-1	0	0	0	0	0.603541473125334	0.303720715995793	37.1343174294857	63.3502718172921	23.5773894776934	0	0	0	0	0	0	0.193515907599414	0	0
maker-tulip_contig_89_pilon_pilon-augustus-gene-0.27-mRNA-1	148.766809962015	184.047745464878	156.562083225247	7.63862445711033	5.73364399469067	3.18906751795582	8.77041667932577	10.7614243792195	14.6342417447752	29.7724137724074	33.1342309986615	38.1334686355892	80.9623909296778	87.9080528952597	78.903315176365	2.51570679879238	3.84751364595847	2.35646642432915
maker-tulip_contig_130_pilon_pilon-augustus-gene-0.21-mRNA-1	2.57127819687434	2.59503328746575	1.46319703948829	10.9123206530148	9.65666357000535	10.4783647018548	7.2775797977384	8.12182972016566	5.42008953510193	14.958822529551	10.9233728567016	13.6527233386677	16.0504389036028	15.9832823445927	12.2416991105785	5.99899313558183	3.84751364595847	6.87302707096001
maker-tulip_contig_731_pilon_pilon-augustus-gene-0.27-mRNA-1	750.445908030611	780.306547746432	770.739040550456	150.434134716561	168.086300265406	145.78594367798	151.336338870919	128.731001064626	125.204068260855	215.087535594807	239.039809347487	236.804132391375	139.269516327279	146.346928967677	132.655503089178	104.692106011283	98.111597971941	113.699504973881
augustus_masked-tulip_contig_33_pilon_pilon-processed-gene-4.67-mRNA-1	0.257127819687434	0	0	0	0	0	0	0	0	0	0.640837874259828	2.28173100395666	6.16237426400714	7.632017319543	5.73913111938666	0	1.38510491254505	1.21554393054979
maker-tulip_contig_272_pilon_pilon-augustus-gene-3.7-mRNA-1	3.42347325640983	1.65483276562239	2.15089964804778	2.53789400330115	2.03242591074956	2.03341019359183	1.89776888571794	0.800000227436317	1.42548354773181	3.02371538898303	4.18729292840228	1.58183277303185	2.69377498944095	3.49634301287965	2.69651244953924	4.60954891901804	4.32845285170328	3.74089044862252
maker-tulip_contig_636_pilon_pilon-augustus-gene-0.34-mRNA-1	28.151823001207	28.8607625155229	28.5323422700216	15.9460182799554	19.7584389764406	18.1078290876692	17.132169262317	14.0162476395759	14.4174381633711	21.8398808931445	18.9720780899479	20.0522412438502	5.62475558037762	4.09571610080187	5.90940202519744	12.4430728586423	9.4504553928855	10.0385469676422
augustus_masked-tulip_contig_704_pilon_pilon-processed-gene-1.39-mRNA-1	4.22424275200784	2.99426917784509	4.02379185859279	15.5890295043068	19.011556403448	14.4267340098002	10.2632535609131	10.3553328932112	14.3632372680201	19.4609924170858	14.7465533565472	15.849713301212	8.16725873413417	10.4890290386389	6.34342590275431	8.32118402677479	10.5806625263858	17.4771259804412
maker-tulip_contig_16_pilon_pilon-augustus-gene-0.10-mRNA-1	584.965789788912	370.890142162412	463.650561887852	43.3375020219729	46.6235787989321	48.7471749173247	52.2492908555578	44.8731092039152	44.7157386645909	87.4292345901915	98.6744681388712	86.7811035204973	71.5877982957151	62.4346966585652	64.4358525911359	115.52899683685	86.5690570340656	79.5307418211087
maker-tulip_contig_669_pilon_pilon-augustus-gene-0.2-mRNA-1	0.367325456696334	0	0	32.8928522540874	27.9137931320467	32.0425355375561	46.4645479394067	47.5127038629691	46.6127700018766	26.867788038514	24.3955327133003	28.2470138041402	19.5304013207556	12.486939331713	16.2480733649496	31.349577031105	26.9325955217093	34.5615075568275
maker-tulip_contig_178_pilon_pilon-augustus-gene-0.69-mRNA-1	49.7725993823533	88.4307497190251	88.7063205189775	31.6457298937428	29.1208760782974	46.4692695473563	35.6414805478983	47.7157496059732	45.2577476181011	7.55202690812285	5.4616864283508	4.70783563402336	1.70447138799322	1.99791029307409	2.1144753009181	7.35360448877772	8.17596649766175	5.49842165676801
maker-tulip_contig_716_pilon_pilon-augustus-gene-0.26-mRNA-1	7.89749731897118	11.3782228758114	10.9739777961622	11.2241012431009	11.1655172528187	10.4783647018548	7.09097518753998	3.4517776310704	6.23310296536722	9.58526492184823	8.1925296425262	7.21868130550249	18.3940870620935	19.9791029307409	22.9253637889015	11.223922640766	6.25220967468252	11.7823321216457
maker-tulip_contig_698_pilon_pilon-augustus-gene-2.30-mRNA-1	182.744414706426	190.036283820569	198.080299220727	107.096632694588	84.0431501327028	102.353881290582	52.6225000759546	51.9797102090602	55.2849132580397	62.4494532787082	83.1996899252105	68.8913281112085	124.213352400006	111.38349883888	166.264531556402	254.08638667803	272.211590451562	461.27830256243
maker-tulip_contig_338_pilon_pilon-augustus-gene-1.12-mRNA-1	0	0.798471780758692	0.182899629936036	23.3835442564602	28.3664492368907	22.7790536996845	3.54548759376999	3.65482337407455	3.52305819781625	0.871387720168021	0.18205621427836	0.627711417869781	2.41466779965706	1.49843271980556	1.55803443225544	6.77305676597948	6.25220967468252	4.90930505068572
augustus_masked-tulip_contig_894_pilon_pilon-processed-gene-0.0-mRNA-1	0.550988185044501	1.59694356151738	4.02379185859279	6.54739239180886	7.99692451891068	7.89673861589061	6.90437057734156	3.85786911707869	6.50410744212231	12.344659369047	9.28486692819636	10.5141662493188	9.65867119862823	2.49738786634261	5.00796781796393	4.83789768998534	4.32845285170328	3.53469963649372
maker-tulip_contig_228_pilon_pilon-augustus-gene-1.93-mRNA-1	83.7887732997173	72.9863092997001	69.6170861425534	1.40457155833804	1.810624419376	0.911162147987378	4.489706921374	6.71269226371691	4.88621071589439	16.756785858831	15.1525387143879	14.6303838719999	26.970418929346	22.6712870506582	27.6161603117278	2.51570679879238	1.92375682297924	1.96372202027429
maker-tulip_contig_745_pilon_pilon-augustus-gene-2.5-mRNA-1	0.734650913392668	0	0.365799259872072	217.155180994994	248.206430822794	204.707762581164	34.3352482765094	24.365489160497	31.1655148268361	19.4609924170858	19.1159024992278	18.674414681626	4.33219811114943	1.49843271980556	2.22576347465064	14.1266612547572	19.2375682297924	12.7641931317829
augustus_masked-tulip_contig_236_pilon_pilon-processed-gene-8.77-mRNA-1	0.183662728348167	0	0	0.311780590086136	0	0.151860357997896	0.186604610198421	0	0	0	0	0	0.0710196411663841	0	0	30.5755134007074	48.5748597802257	30.0449469101966
augustus_masked-tulip_contig_827_pilon_pilon-processed-gene-0.10-mRNA-1	0	5.21801308725805	4.41519706665591	0	0	0	0	0.56040625069143	0	0	0	0	0.397709990531751	0.904054407616024	0	0	0	0
augustus_masked-tulip_contig_80_pilon_pilon-processed-gene-0.39-mRNA-1	2.57127819687434	4.19197684898313	6.5843866776973	9.35341770258408	9.05312209688001	15.9453375897791	7.65078901813524	38.5786911707869	10.2981701166937	2.9046257338934	4.91551778551572	3.29548494381635	3.1248642113209	4.99477573268521	0.890305389860254	3.28977042919003	1.44281761723443	2.35646642432915
maker-tulip_contig_378_pilon_pilon-augustus-gene-3.1-mRNA-1	0.550988185044501	0.598853835569019	0.731598519744144	184.262328740906	204.75144475777	278.815617284138	536.861463540856	602.639765236292	605.695005547641	269.984961965392	212.095489634289	222.523697634837	23.1524030202412	17.9811926376668	17.8061077972051	44.5086587478652	47.6129813687361	45.5583508703635
maker-tulip_contig_236_pilon_pilon-augustus-gene-4.57-mRNA-1	0	0	0	2.18246413060295	2.56505126078267	1.82232429597476	4.29190603456367	0.812182972016566	2.16803581404077	43.4241547217064	68.271080354385	69.3621116746108	17.6838906504296	14.4848496247871	15.0239034538918	49.1530405302511	43.7654677227776	54.9842165676801
augustus_masked-tulip_contig_495_pilon_pilon-processed-gene-0.19-mRNA-1	25.8964446970916	4.79083068455215	20.6676581827721	8.57396622736874	7.69515378234801	5.77069360392006	12.6891134934926	9.3401041781905	15.4472551750405	10.7471152154056	14.0183284994337	12.0834447939933	2.84078564665536	2.49738786634261	3.56122155944102	4.2573499671871	6.73314888042733	7.4621436770423
maker-tulip_contig_80_pilon_pilon-augustus-gene-0.138-mRNA-1	0	0	0	0.467670885129204	0	0	0	0	0	0	0	0	0	0	0	5.41844541278359	11.5425409378754	3.53469963649372
maker-tulip_contig_33_pilon_pilon-augustus-gene-2.2-mRNA-1	1.46930182678534	3.59312301341411	2.74349444904054	25.7218986821062	16.5973905109467	23.6902158476718	38.4405497008746	22.1319859874514	36.0435954084278	18.2991421235284	11.651597713815	13.3388676297329	0.35509820583192	0	0.222576347465064	1.93515907599414	0.961878411489618	1.374605414192
maker-tulip_contig_634_pilon_pilon-augustus-gene-0.5-mRNA-1	0	0	0	0	0	0	0	0	0	0	0	0	0	0	0.111288173732532	129.462142184008	140.434248077484	108.397455519141
maker-tulip_contig_523_pilon_pilon-augustus-gene-0.133-mRNA-1	104.320429701759	52.8987554752633	64.9293686272928	29.4632657631399	42.0970177504921	37.9650894994741	66.0580320102409	79.3908855146193	63.1440430839375	11.7637342222683	11.2874852852583	10.9849498127212	22.5132262497437	18.9801477842038	24.483398221157	5.03141359758476	9.13784490915137	8.8367490912343
maker-tulip_contig_143_pilon_pilon-augustus-gene-2.28-mRNA-1	38.9364984098114	35.1327583533824	37.3115245069514	24.7865569118478	28.8191053417347	29.0053283775982	34.148643666311	32.4873188806626	42.276698373795	14.523128669467	12.9259912137636	16.4774247190818	21.9450691204127	18.4806702109353	19.0302777082629	9.48227947237127	12.9853585551098	13.3533097378652
augustus_masked-tulip_contig_507_pilon_pilon-processed-gene-0.15-mRNA-1	32.2787245071904	13.5660355550902	28.7847437593334	4.4054597379171	7.36924138686033	6.52999539390954	15.1653566708256	12.7370594586498	9.71551049167021	254.851861891807	232.442092142039	248.25358865332	92.5066336012736	151.336709924629	130.748023791402	226.957391591668	323.075720851133	307.719168021022
augustus_masked-tulip_contig_759_pilon_pilon-processed-gene-0.11-mRNA-1	42.7934157051229	23.3552995871917	34.5680300579108	11.379991538144	10.1093196748493	10.6302250598527	16.7944149178579	14.416247753294	15.1762506982854	9.58526492184823	10.0130917853098	7.21868130550249	13.5647514627794	12.486939331713	18.4738368396003	6.38602495078066	9.61878411489618	4.51656064663087
maker-tulip_contig_845_pilon_pilon-augustus-gene-0.39-mRNA-1	2.203952740178	2.39541534227608	4.5724907484009	11.379991538144	15.84296366954	11.9969682818338	9.51683512011945	7.91878397716151	10.5691745934488	16.5563666831924	10.5592604281449	12.0834447939933	7.95419981063502	9.98955146537043	8.45790120367241	7.16008858117831	4.32845285170328	9.42586569731659
maker-tulip_contig_669_pilon_pilon-augustus-gene-2.90-mRNA-1	1.6529645551335	1.59694356151738	1.28029740955225	57.9911897560213	128.554333775696	89.293890502763	217.954184711755	352.284364112185	141.193332389405	231.06297713122	145.644971422688	132.133253461589	58.9463021680988	73.9226808437411	68.5535150192396	43.3475633022687	40.8798324883088	44.9692342642812
augustus_masked-tulip_contig_132_pilon_pilon-processed-gene-1.3-mRNA-1	868.541042358482	910.457448010098	847.739784753527	619.975703386281	627.532246682066	616.704913829457	508.684167400895	442.436674006024	485.369017868378	885.475154977404	811.970715681486	876.912850764085	1421.88423579218	1340.59780665271	1442.18344339988	660.0827608216	626.182845879741	678.073213600712
augustus_masked-tulip_contig_85_pilon_pilon-processed-gene-0.1-mRNA-1	24.0818569410117	17.28092551507	21.7339630252992	3.11780590086136	2.86682199734534	3.34092787595372	5.22492908555578	1.82741168703727	4.60707610483664	16.7015979698871	16.5671154993308	15.3789297378096	6.88890519313925	5.99373087922226	7.23373129261456	12.1915021787631	11.0616017321306	10.8004711115086
augustus_masked-tulip_contig_586_pilon_pilon-processed-gene-3.33-mRNA-1	0	1.02404005882302	0.265204463407252	2.25261476337233	2.84117148473751	1.77221037783545	1.65331684635801	1.10253838451249	2.56370235010321	3.26044238629535	3.1641370041579	2.79331580952053	1.27480255893659	0	0.677744978031118	2.71889850177176	1.86123472623241	0.459510952744184
maker-tulip_contig_555_pilon_pilon-augustus-gene-2.12-mRNA-1	585.516777973957	329.36960956296	425.973238121028	124.088674854282	157.976980590556	147.000826541964	266.098174142948	277.96962217267	233.876863439648	87.4292345901915	87.5690390678912	89.1350213375089	244.591644177027	198.792074160871	244.38882951664	36.1874747210904	37.5132580480951	35.3469963649372
maker-tulip_contig_123_pilon_pilon-augustus-gene-0.2-mRNA-1	6.42819549218585	11.3782228758114	4.93829000827298	8.72985652241181	9.05312209688001	7.28929718389903	9.14362589972261	8.52792120617394	6.23310296536722	6.97110176134417	9.28486692819636	12.7111562118631	14.2749478744432	7.99164117229634	11.7965464156484	15.2877567003537	15.8709937895787	21.0118256169349
maker-tulip_contig_843_pilon_pilon-augustus-gene-1.6-mRNA-1	27.1820837955287	14.3724920536565	25.9717474509171	31.4898395986997	30.780615129392	33.4092787595372	29.8567376317473	40.0000113718159	41.7346894202849	42.262304428149	50.9757399979408	52.7277591010616	20.0275388089203	13.4858944782501	17.360955102275	38.5096656122833	36.5513796366055	45.5583508703635
maker-tulip_contig_260_pilon_pilon-augustus-gene-0.10-mRNA-1	7.16284640557851	9.38204342391463	6.76728630763334	43.0257214318868	42.8514445918987	34.0167201915288	30.4165514623426	31.6751359086461	36.3145998851829	34.8555088067208	39.8703109269609	39.2319636168613	32.5980152953703	32.4660422624539	30.0478069077836	25.5440998031226	26.9325955217093	39.4708126075132
maker-tulip_contig_716_pilon_pilon-augustus-gene-1.77-mRNA-1	167.867733710225	208.001898887639	161.866172493392	190.342050247586	186.64520056401	180.106384585505	141.8195037508	130.152321265655	149.594471168813	191.850529723659	211.185208562898	215.148088474868	163.913331812014	160.332301019195	156.582460441672	120.947442249634	146.205518546422	144.529940692188
maker-tulip_contig_773_pilon_pilon-augustus-gene-2.36-mRNA-1	27.3657465238769	45.3132735580558	27.6178441203415	6.23561180172272	5.28098788984667	7.44115754189692	6.3445567467463	8.3248754631698	4.87808058159174	14.3778973827723	11.8336539280934	10.3572383948514	12.0733389982853	12.486939331713	12.9094281529737	11.0304067331666	6.25220967468252	9.81861010137145
augustus_masked-tulip_contig_402_pilon_pilon-processed-gene-2.15-mRNA-1	0	0	0.545040897209388	11.503144871228	3.82645293961462	6.73196967004674	11.343694253962	9.85380990799098	3.62332985421564	71.5699780831335	76.9733673968906	76.8742480679674	46.0441639574018	45.7321666084658	61.128368067805	38.8579942459623	27.7598109555904	54.5639800553414
maker-tulip_contig_691_pilon_pilon-augustus-gene-4.46-mRNA-1	0	0	0	0	0	0	0.933023050992103	0	0	6.68063918795483	8.01047342824784	3.4524127982838	0.35509820583192	0	0.111288173732532	0.967579537997069	0.961878411489618	0.981861010137145
augustus_masked-tulip_contig_628_pilon_pilon-processed-gene-4.15-mRNA-1	17.0898168727969	0	6.20212645113098	0	0	0	0	0	0	5.53912127453472	5.65466601548586	3.76469922867401	3.16321481755075	6.25345921732189	8.96982680284206	0	0	0
maker-tulip_contig_799_pilon_pilon-augustus-gene-0.6-mRNA-1	233.618990458868	179.855768615895	195.153905141751	140.76893642389	133.835321665543	150.493614775915	232.695948917431	219.898539673485	221.139653032159	68.8396298932737	61.7170566403641	67.4789774210015	68.9600715725589	71.9247705506671	85.5806056003169	44.1216269326663	47.6129813687361	43.9873732541441
augustus_masked-tulip_contig_362_pilon_pilon-processed-gene-9.6-mRNA-1	0	0	0	32.4251813689581	37.8722274386147	26.2718419336361	6.90437057734156	4.06091486008283	5.69109401185703	2.46893187380939	1.09233728567016	2.35391781701168	2.27262851732429	2.49738786634261	1.66932260598798	8.90173174957303	6.73314888042733	6.48028266690515
maker-tulip_contig_191_pilon_pilon-augustus-gene-0.74-mRNA-1	0	0	0	0	0	0.303720715995793	8.58381206912735	1.42132020102899	8.40113877940799	0	0.18205621427836	0.156927854467445	0.0710196411663841	0	0	0	0	0.196372202027429
maker-tulip_contig_934_pilon_pilon-augustus-gene-1.16-mRNA-1	0.550988185044501	0.598853835569019	0	0	0	0.151860357997896	0	0	0	0.580925146778681	0.54616864283508	0.470783563402336	0.923255335162993	1.49843271980556	1.00159356359279	327.428915658208	675.238644865712	434.964427490755
maker-tulip_contig_327_pilon_pilon-augustus-gene-10.51-mRNA-1	12.4890655276754	24.7526252035195	17.1925652139874	73.8919998504142	77.5550792966054	75.3227375669566	79.3069593343288	85.8883492907518	69.1061415725496	21.0585365707272	21.8467457134032	21.8129717709749	72.7951321955437	49.9477573268521	67.8857859768444	161.972814660709	100.99723320641	164.559905298985
augustus_masked-tulip_contig_238_pilon_pilon-processed-gene-0.9-mRNA-1	1.6529645551335	0.399235890379346	0.365799259872072	34.6076454995611	27.4611370272027	34.4723012655225	44.2252926170257	37.7665081987703	46.0707610483664	10.8923465021003	14.3824409279904	10.9849498127212	19.8144798854212	19.9791029307409	17.9173959709376	42.7670155794704	38.9560756653295	62.249988042695
maker-tulip_contig_327_pilon_pilon-augustus-gene-10.39-mRNA-1	500.848260205452	394.045823804415	470.600747825421	381.151771380301	392.60372826803	389.977399338598	411.836374707914	371.776755440583	389.975442050584	268.67788038514	241.406540133105	276.977663135041	391.034144262111	343.640570408743	336.424149193443	281.372129649548	278.463800126244	323.81776114323
augustus_masked-tulip_contig_236_pilon_pilon-processed-gene-7.8-mRNA-1	50.6909130240941	42.3190043802107	37.1286248770153	20.8892995357711	20.2186393496987	27.3348644396213	24.6318085461915	22.5380774734597	28.4554700592851	16.2659041098031	17.2953403564442	15.5358575922771	43.1089221879951	42.9550713010928	53.9747642602779	16.6423680535496	20.199446641282	14.3351707480023
augustus_masked-tulip_contig_505_pilon_pilon-processed-gene-1.22-mRNA-1	4.95889366540051	0.998089725948365	5.30408926814505	15.9008100943929	14.1832246184454	9.41534219586957	8.02399823853209	7.91878397716151	6.23310296536722	12.780353229131	10.0130917853098	13.9665790476026	13.1386336157811	27.4712665297687	29.1575015179233	21.4802657435349	45.208285340012	49.8785393149669
augustus_masked-tulip_contig_224_pilon_pilon-processed-gene-2.12-mRNA-1	0	0.199617945189673	0	0	0.754426841406668	0.759301789989482	5.97134752634946	12.5888360662568	14.6342417447752	1.4523128669467	0.72822485711344	2.82470138041402	0.923255335162993	0	0.445152694930127	1.93515907599414	5.2903312631929	1.374605414192
maker-tulip_contig_112_pilon_pilon-augustus-gene-3.102-mRNA-1	20.7538883033429	16.5682894507429	13.5345726152667	5.61205062155045	4.97921715328401	6.98557646790323	4.85171986515894	6.09137229012424	6.50410744212231	6.53540790126016	8.37458585680456	5.96325846976292	5.82361057564349	8.99059631883338	9.01434207233507	6.57954085838007	10.5806625263858	4.90930505068572
augustus_masked-tulip_contig_303_pilon_pilon-processed-gene-0.16-mRNA-1	24.4767318069602	26.828651833492	22.7746619196352	10.1188390512455	10.3250857514917	15.7949958353612	33.6242847116534	41.7949357399725	31.9216173169828	2.10004440560493	2.21380356562486	2.07458623605963	10.2183059710193	10.5140029173024	12.9149925616603	13.9486266197657	15.8325186531191	18.0387504782396
maker-tulip_contig_333_pilon_pilon-augustus-gene-1.16-mRNA-1	12.4890655276754	16.7679073959325	13.1687733553946	6.07972150667965	5.58275862640934	5.01139181393058	8.21060284873051	9.74619566419879	8.67214325616309	4.06647602745077	3.09495564273212	3.13855708934891	7.17298375780479	7.49216359902782	8.23532485620735	2.51570679879238	4.32845285170328	2.749210828384
augustus_masked-tulip_contig_777_pilon_pilon-processed-gene-0.9-mRNA-1	0.734650913392668	0.399235890379346	0.365799259872072	103.043485023468	73.4811743530094	82.3083140348598	127.264344155323	80.40611422964	111.6538444231	3.48555088067208	2.36673078561868	1.88313425360934	68.2498751608951	64.4326069516392	79.3484678712951	151.522955650341	138.99143046025	172.022048976028
maker-tulip_contig_704_pilon_pilon-augustus-gene-1.5-mRNA-1	163.643490958217	159.095502316169	169.547956950705	19.1745062902974	26.8575955540774	27.0311437236256	27.9906915297631	53.8071218960975	31.1655148268361	35.1459713801102	39.6882547126825	39.2319636168613	57.4548897036047	55.4420106328059	65.8825988496588	18.7710430371431	25.4897779044749	18.8517313946332
maker-tulip_contig_407_pilon_pilon-augustus-gene-8.75-mRNA-1	3.85691729531151	2.79465123265542	2.0118959292964	50.6643458889971	42.2479031187734	48.8990352753226	27.9906915297631	31.8781816516502	31.1655148268361	24.6893187380939	20.7544084277331	23.5391781701168	35.864918789024	33.4649974089909	29.1575015179233	29.6079338627103	31.2610483734126	45.1656064663087
maker-tulip_contig_333_pilon_pilon-augustus-gene-2.42-mRNA-1	119.19711069796	113.382992867734	121.628253907464	11.535881833187	14.032339250164	17.7676618857539	21.0863209524215	14.416247753294	18.4283044193466	24.8345500247886	22.2108581419599	26.9915909684006	15.340242491939	18.4806702109353	13.9110217165665	16.6423680535496	20.199446641282	16.2988927682766
augustus_masked-tulip_contig_85_pilon_pilon-processed-gene-1.12-mRNA-1	14.325692811157	11.7774587661907	9.14498149680181	83.8689787331706	71.3687791970708	80.0304086648914	64.751799738852	53.6040761530933	50.1358281996928	38.4862909740876	37.1394677127855	42.2135928517428	34.6575848891954	28.9696992495742	37.5041145478632	87.2756743273356	56.2698870721427	104.862755882647
augustus_masked-tulip_contig_586_pilon_pilon-processed-gene-5.14-mRNA-1	8.81581096071202	10.7793690402423	7.86468408724955	208.892995357711	233.268779362942	199.24078969324	29.1103191909536	22.7411232164638	31.7075237803463	5.66402018109214	3.82318049984556	4.23705207062102	4.04811954648389	4.49529815941669	5.11925599169646	8.70821584197362	13.4662977608547	9.03312129326173
augustus_masked-tulip_contig_560_pilon_pilon-processed-gene-2.3-mRNA-1	6.06087003548951	1.79656150670706	6.95018593756937	1.87068354051682	4.37567568015867	3.49278823395162	4.47851064476209	4.26396060308697	3.79406267457135	5.66402018109214	6.55402371402096	8.78795985017694	10.2268283279593	10.9885066119075	13.3545808479038	3.67680224438886	5.77127046893771	4.32018844460344
maker-tulip_contig_125_pilon_pilon-augustus-gene-0.314-mRNA-1	51.8332951944197	67.9778950548912	64.2819039373193	69.2714115053377	65.4993383709269	57.4275129804845	68.5118826343501	33.4111770113315	53.599265412623	50.4548013105954	66.1592282687561	57.2472813097241	171.939261460227	155.102770827074	163.012691119938	149.951606480634	123.601375876416	159.815552898003
augustus_masked-tulip_contig_702_pilon_pilon-processed-gene-0.25-mRNA-1	0.367325456696334	0	0	15.5890295043068	16.4465051426654	19.1344051077349	39.933386582462	37.9695539417744	44.4447341878358	8.42341462829087	10.5592604281449	8.94488770464439	1.56243210566045	0.998955146537043	3.11606886451089	4.83789768998534	6.25220967468252	7.4621436770423
maker-tulip_contig_529_pilon_pilon-augustus-gene-1.45-mRNA-1	44.9826754270331	65.3509228961951	53.0921045778326	7.46246842371167	8.02106617783569	7.36522736289797	16.5182400947642	16.030461410177	16.3768005303105	18.3790193312105	21.2914742598542	16.8414973414462	44.5094295117962	29.5640775617638	45.172982599772	12.5998207437978	10.8355603054305	7.61138655058314
maker-tulip_contig_689_pilon_pilon-augustus-gene-4.25-mRNA-1	1234.94818541308	1087.11932950296	1016.73904281442	410.926817733527	436.360485069617	447.988056093794	534.995417438872	614.416418330532	462.333637344194	439.760336111461	420.367798768733	425.431413461244	317.173717449071	307.178707560141	318.840617743703	342.910188266161	268.845016011348	292.790953222897
maker-tulip_contig_626_pilon_pilon-augustus-gene-1.32-mRNA-1	0.183662728348167	0.598853835569019	0.548698889808108	7.48273416206726	8.60046599203601	6.98557646790323	19.966693291231	15.4314764683147	16.802277558816	0.580925146778681	0	0.156927854467445	73.8604268130394	36.4618628486021	43.1798114082223	86.6951266045374	77.9121513306591	73.246831356231
augustus_masked-tulip_contig_715_pilon_pilon-processed-gene-5.18-mRNA-1	6.97918367723035	24.5530072583298	10.6081785362901	180.676851954916	172.311090577283	169.62801988365	43.478874176232	43.045697516878	44.1737297110807	38.7767535474769	46.4243346409818	40.8012421615358	24.6438154847353	21.4775356505464	24.7059745686221	47.9919450846546	60.1174007181011	60.6790104264755
maker-tulip_contig_4_pilon_pilon-augustus-gene-1.13-mRNA-1	134.624779879206	130.749754099236	123.457250206824	46.7670885129204	47.0762349037761	40.3948552274404	31.7227837337315	20.3045743004141	32.7915416873667	83.5079898494354	81.1970715681486	87.5657427928345	96.7997709097815	78.9174565764264	97.933592884628	73.1490130725784	50.0176773974601	52.2350057392961
maker-tulip_contig_570_pilon_pilon-augustus-gene-0.3-mRNA-1	61.527013996636	81.6437395825763	49.2000004527937	199.383687360084	198.414259289954	215.489847999015	228.404042882867	217.461990757435	178.862954658364	98.9025062390704	87.5690390678912	92.7443619902602	166.967176382169	147.345884114214	150.239034538918	229.509866412905	142.838944106208	184.786242107811
augustus_masked-tulip_contig_81_pilon_pilon-processed-gene-0.14-mRNA-1	0.367325456696334	0.399235890379346	0	0	0	0	0	0.406091486008283	0	0.14523128669467	0	0	0.142039282332768	0.499477573268521	0	25.3505838955232	38.4751364595847	31.2231801223612
maker-tulip_contig_829_pilon_pilon-augustus-gene-3.13-mRNA-1	4.22424275200784	3.39350506822444	1.28029740955225	3.8972573760767	3.168592733908	2.27790536996845	3.35888298357157	5.68528080411596	4.06506715132645	7.40679562142818	5.27963021407244	2.98162923488146	3.97709990531751	2.99686543961113	3.22735703824342	3.67680224438886	7.69502729191694	5.10567725271315
augustus_masked-tulip_contig_334_pilon_pilon-processed-gene-4.5-mRNA-1	0.183662728348167	0.598853835569019	0.731598519744144	1027.00526374373	1372.00065378217	1290.81304298212	421.353209828034	1352.48769415059	411.384795714236	0.580925146778681	0.18205621427836	0.627711417869781	1.13631425866215	0	0.667729042395191	0	0	0
maker-tulip_contig_484_pilon_pilon-augustus-gene-0.2-mRNA-1	162.174189131431	134.14325916746	118.701859828487	71.085974539639	84.1940355009841	75.6264582829524	34.3352482765094	35.1269135397165	30.0814969198157	67.9682421731057	75.5533289255194	80.1901336328646	56.95775221544	43.4545488743614	63.5455472012756	67.343535844596	73.5836984789558	73.6395757602858
maker-tulip_contig_819_pilon_pilon-augustus-gene-0.64-mRNA-1	4460.06569520689	5238.77335355778	4628.09223590146	1686.57710207095	1837.3311295618	1889.59843456782	2672.36462265158	2967.71657974853	2103.53674857306	1411.64810667219	1288.77594087651	1258.71832068338	788.957193717361	864.59567932781	915.901669818736	774.257146305255	567.989201984619	566.73017505116
maker-tulip_contig_181_pilon_pilon-augustus-gene-1.21-mRNA-1	29.3860365357067	26.3495687650368	30.178438939446	12.4712236034454	17.9553588254787	13.8192925778086	12.5025088832942	18.8832540993851	20.3253357566322	30.7890327792701	34.5906807128884	41.585881433873	139.198496686113	129.364691476547	147.011677500674	11.8044703635642	15.8709937895787	12.371448727728
maker-tulip_contig_907_pilon_pilon-augustus-gene-3.17-mRNA-1	3959.03377227309	3598.71231587942	3702.43720879518	1563.57965928197	1803.3819216985	1656.03720396706	2841.80160871175	3240.20396686009	2534.16286213691	2089.00682781614	2045.40156741738	2000.20243304206	1121.4001340172	1192.75244496523	1136.36354198288	573.194118309464	646.382292521023	691.426523338577
maker-tulip_contig_33_pilon_pilon-augustus-gene-1.53-mRNA-1	158.868260021165	140.13179752315	143.94200875966	10.6005400629286	18.4080149303227	17.0083600957644	23.1389716646042	31.2690444226378	31.7075237803463	28.0296383320713	17.6594527850009	25.5792402781936	22.4422066085774	27.9707441030372	18.6964131870653	14.1266612547572	10.5806625263858	7.65851587906973
maker-tulip_contig_837_pilon_pilon-augustus-gene-7.59-mRNA-1	24.243480141958	13.7736382180874	26.5204463407252	44.1169534971882	37.8722274386147	39.7874137954488	44.9717110578194	37.360416712762	40.6506715132645	59.5448275448148	69.7275300686119	74.3838030175691	62.6393235087507	53.9435779130003	53.9747642602779	38.8966974274822	33.6657444021366	42.0236512338698
maker-tulip_contig_55_pilon_pilon-augustus-gene-1.49-mRNA-1	0	0.399235890379346	0.182899629936036	11.379991538144	14.1832246184454	8.65604040588009	22.7657624442073	17.4619338983562	11.6531925004691	7.11633304803884	4.36934914268064	3.76626850721869	0.710196411663841	0.998955146537043	1.33545808479038	4.64438178238593	2.88563523446885	2.94558303041143
augustus_masked-tulip_contig_597_pilon_pilon-processed-gene-4.50-mRNA-1	2.02029001182984	0	0.731598519744144	0.935341770258408	0.452656104844001	1.36674322198107	0.373209220396841	1.42132020102899	0.813013430265289	66.3706980194643	49.3372340694356	68.1066888388713	1.13631425866215	0.998955146537043	0.667729042395191	4.83789768998534	4.32845285170328	7.85488808109716
augustus_masked-tulip_contig_3_pilon_pilon-processed-gene-4.21-mRNA-1	0.734650913392668	2.1957973970864	0.365799259872072	5.30027003146431	3.92301957531467	2.12604501197055	2.23925532238105	3.24873188806626	2.71004476755096	5.51878889439747	5.09757399979408	6.12018632423037	6.88890519313925	5.49425330595373	4.34023877556874	4.45086587478652	7.21408808617213	6.87302707096001
augustus_masked-tulip_contig_168_pilon_pilon-processed-gene-0.95-mRNA-1	26.9984210671806	27.1480405457955	17.0096655840514	11.0682109480578	11.1655172528187	11.2376664918443	18.6604610198421	17.8680253843644	21.9513626171628	25.2702438848726	29.1289942845376	19.7729096628981	60.7217931972584	60.4367863654911	62.0988009427527	25.3505838955232	30.299169961923	27.2957360818126
maker-tulip_contig_504_pilon_pilon-augustus-gene-2.19-mRNA-1	642.084898305192	411.013349145537	554.917477225934	78.2569281116201	94.9068966489588	93.697840884702	95.1683512011945	151.878215767098	121.681010063038	231.35343970461	231.757560776352	231.939368902884	159.155015853867	140.353198088454	142.894015072571	92.6941197401192	99.5544155891755	79.1379974170539
maker-tulip_contig_616_pilon_pilon-augustus-gene-0.31-mRNA-1	561.273297831999	815.439306099814	639.417106256382	316.457298937428	334.211090743154	335.459530817353	645.278742066139	793.502763660185	530.084756532969	313.990041833877	196.074542777794	184.233301144781	144.453950132425	179.811926376668	177.504637103388	123.656664956025	136.586734431526	130.391142146213
augustus_masked-tulip_contig_916_pilon_pilon-processed-gene-0.34-mRNA-1	95.3209560126987	87.8318958834561	94.0104097871226	27.43669192758	24.5943150298574	22.1716122676929	21.6461347830168	15.837567954323	20.8673447101424	22.8013120110632	28.4007694274242	28.8747252220099	63.4915592027474	63.9331293783707	67.5519214556468	18.7710430371431	15.8709937895787	19.0481035966606
maker-tulip_contig_340_pilon_pilon-augustus-gene-0.26-mRNA-1	11.2034264292382	10.7793690402423	13.1687733553946	224.482024862018	253.638304080922	218.223334442977	32.4692021745252	33.096456109675	40.6506715132645	3.77601345406143	6.18991128546424	6.74789774210015	3.47996241715282	1.99791029307409	2.78220434331329	11.9979862711637	4.32845285170328	5.30204945474058
augustus_masked-tulip_contig_479_pilon_pilon-processed-gene-1.5-mRNA-1	0.183662728348167	0.399235890379346	0.731598519744144	6.70328268685192	3.92301957531467	2.12604501197055	8.58381206912735	5.8883265471201	0.813013430265289	7.84248948151219	6.3719674997426	0.784639272337227	3.47996241715282	1.49843271980556	0.779017216127722	5.611961320383	7.21408808617213	2.35646642432915
maker-tulip_contig_839_pilon_pilon-augustus-gene-1.48-mRNA-1	0	0	0	60.0177635915812	98.9808015925548	107.213412746515	27.9906915297631	112.081250138286	14.6342417447752	0.14523128669467	0	0.156927854467445	0.213058923499152	0	0.333864521197595	0.967579537997069	0.480939205744809	0.392744404054858
maker-tulip_contig_777_pilon_pilon-augustus-gene-1.64-mRNA-1	2.01661675726287	4.7029987886687	3.20440151647935	2.14193265389175	2.2059440842731	1.46697105825968	1.80073448841476	3.00304653903125	1.22223019016548	1.75584625613856	3.10041732916047	2.63324939796373	1.03191538614756	1.13381409131954	0.171383787548099	3.18140152093436	1.81314080565793	1.84982614309838
maker-tulip_contig_168_pilon_pilon-augustus-gene-0.17-mRNA-1	2.75494092522251	1.99617945189673	5.48698889808108	11.379991538144	12.8252563039134	8.3523196898843	8.77041667932577	8.73096694917808	6.50410744212231	25.1250125981779	25.6699262132488	21.6560439165075	11.5762015101206	11.487984185176	9.1256302460676	18.9645589447425	17.3138114068131	23.7610364453189
maker-tulip_contig_773_pilon_pilon-augustus-gene-3.35-mRNA-1	100.830837863144	53.2979913656427	109.922677591558	516.77632806777	374.044827969426	413.060173754278	412.209583928311	448.12195481014	324.39235867585	103.985601273384	125.072619209233	116.12661230591	261.707377698125	178.812971230131	154.913137835684	712.138539965843	393.889209504999	478.755428542872
maker-tulip_contig_387_pilon_pilon-augustus-gene-1.87-mRNA-1	70.5264876856961	83.2406831440936	70.5992571553099	81.3747340124815	65.3333644658174	78.9673861589061	54.8617553983357	32.6903646236668	49.3228147694276	41.826610568065	54.7989204977864	48.0199234670383	53.0516719512889	39.9582058614817	38.0605554165259	107.981876440473	105.325686058113	86.0110244880139
augustus_masked-tulip_contig_205_pilon_pilon-processed-gene-0.14-mRNA-1	0.183662728348167	0	1.28029740955225	0.467670885129204	1.810624419376	1.21488286398317	0.746418440793682	0.609137229012424	0.813013430265289	3.48555088067208	1.8205621427836	3.4524127982838	1.13631425866215	1.49843271980556	0.222576347465064	1.54812726079531	0.961878411489618	1.76734981824686
maker-tulip_contig_633_pilon_pilon-augustus-gene-0.25-mRNA-1	2.57127819687434	1.19770767113804	2.37769518916847	2.65013501573216	3.31947810218934	1.82232429597476	1.30623227138894	1.62436594403313	2.98104924430606	2.32370058711472	3.45906807128884	2.51084567147913	4.61627667581496	4.99477573268521	3.33864521197595	2.70922270639179	2.88563523446885	3.33832743446629
augustus_masked-tulip_contig_571_pilon_pilon-processed-gene-0.1-mRNA-1	5.87720730714135	4.99044862974182	8.41338297705766	62.6678986073133	54.3187325812801	66.0592557290849	43.2922695660336	31.2690444226378	34.6885730246523	23.6726997312312	17.6594527850009	14.437362611005	18.7491852679254	21.9770132238149	15.8029206700195	7.74063630397655	10.099723320641	13.9424263439475
maker-tulip_contig_633_pilon_pilon-augustus-gene-0.80-mRNA-1	19.2845864765575	35.3323762985721	14.6319703948829	38.0372319905086	30.0261882879854	32.6499769695477	12.6891134934926	8.52792120617394	10.8401790702039	177.182169767498	99.9488616388197	159.752555847859	135.931593192459	129.864169049816	141.11340429285	51.2817155138447	32.2229267849022	48.1111894967201
maker-tulip_contig_318_pilon_pilon-augustus-gene-0.34-mRNA-1	45.5483566303454	46.1117453388145	42.7985134050325	212.946143028831	218.632898639652	229.157280218826	185.858191757627	204.264017462166	166.938757681139	57.9472833911734	59.3503258547454	53.3554705189314	155.248935589716	119.874617584445	115.294547986903	428.637735332702	226.04142670006	325.977855365532
augustus_masked-tulip_contig_667_pilon_pilon-processed-gene-0.199-mRNA-1	2.38761546852617	5.38968452012117	6.21858741782523	4.20903796616284	4.82833178500267	1.97418465397265	1.11962766119052	2.03045743004141	1.08401790702039	9.29480234845889	4.91551778551572	5.49247490636059	3.97709990531751	3.99582058614817	5.67569686035912	6.77305676597948	9.13784490915137	3.92744404054858
maker-tulip_contig_716_pilon_pilon-augustus-gene-1.33-mRNA-1	63.5473040084658	65.4746860222127	63.2832719578685	28.6838142879245	27.9137931320467	27.4867247976192	22.9523670544057	23.1472147024721	23.8483939544485	41.9718418547597	47.3346157123736	34.3672001283705	54.8981826216149	51.9456676199262	50.9699835694995	32.1236406615027	39.4370148710743	36.3288573750743
maker-tulip_contig_121_pilon_pilon-augustus-gene-4.49-mRNA-1	0	0	0	1.40301265538761	2.56505126078267	2.88534680196003	1.86604610198421	8.3248754631698	5.96209848861212	0	0	0	0	0	0	0	0	0
augustus_masked-tulip_contig_234_pilon_pilon-processed-gene-0.37-mRNA-1	214.334403982311	137.936000126064	163.695168792752	61.2648859519257	74.9900280358228	72.7411114809923	130.996436359291	152.284307253106	126.830095121385	30.7890327792701	33.3162872129399	27.3054466773355	42.9668829056624	36.4618628486021	44.2926931455476	12.3850180863625	10.5806625263858	10.8004711115086
maker-tulip_contig_506_pilon_pilon-augustus-gene-1.140-mRNA-1	55.0988185044501	51.1021939685563	45.542007854073	43.1816117269298	39.3810811214281	37.0539273514867	42.7324557354383	29.2385869925964	33.8755595943871	40.6647602745077	40.5985357840743	45.9798613589615	51.9153576926268	50.4472349001206	52.8618825229526	40.2513087806781	43.2845285170328	42.6127678399521
maker-tulip_contig_468_pilon_pilon-augustus-gene-2.27-mRNA-1	50.8745757524423	32.1384891755374	38.5918219165036	43.3375020219729	45.1147251161187	41.002296659432	32.842411394922	32.8934103666709	41.7346894202849	49.2334061894932	66.4505182116014	56.6509554627478	37.2853116123516	34.9634301287965	33.275163946027	57.2807086494265	43.7654677227776	58.9116606082287
maker-tulip_contig_406_pilon_pilon-augustus-gene-0.23-mRNA-1	23.8761546852617	19.7621765737776	19.2044611432838	23.6953248465463	24.89608576642	21.1085897617076	21.6461347830168	24.7715806465052	27.9134611057749	31.2247266393541	26.2160948560839	24.1668895879866	25.9221690257302	20.4785805040094	19.8092949243907	30.7690293083068	31.2610483734126	31.6159245264161
maker-tulip_contig_479_pilon_pilon-augustus-gene-3.53-mRNA-1	0.550988185044501	1.19770767113804	0.365799259872072	11.8476624232732	9.35489283344268	37.0539273514867	1387.40527682526	1618.68066322902	1348.78928081011	15.394516389635	43.3293789982497	25.4223124237261	0.213058923499152	0	0	0	0	0
maker-tulip_contig_192_pilon_pilon-augustus-gene-1.171-mRNA-1	142.705939926526	206.205337380932	205.944983307977	30.5544978284413	39.2301957531467	42.2171795234152	82.1060284873051	68.8325068784039	68.8351370957945	140.148191660357	149.650208136812	141.548924729636	59.6564985797626	50.9467124733892	61.9875127690202	123.850180863625	75.0265160961902	82.6726970535476
augustus_masked-tulip_contig_841_pilon_pilon-processed-gene-0.127-mRNA-1	16.3459828229869	17.3667612315015	14.0832715050748	8.88574681745488	7.69515378234801	7.28929718389903	6.3445567467463	6.90355526214081	6.23310296536722	13.7969722359937	12.1977663566501	11.2988055216561	20.4536566559186	27.4712665297687	22.7027874414365	9.09524765717245	10.5806625263858	6.28391046487773
maker-tulip_contig_668_pilon_pilon-augustus-gene-0.8-mRNA-1	197.804758430976	219.380121763451	204.84758552836	66.409265688347	61.2594595222214	66.5148368030786	66.2446366204393	65.1776835043294	66.3960968049986	123.591824977164	187.882013135268	160.537195120197	68.0368162373959	56.4409657793429	66.1051751971239	83.2118402677479	96.1878411489618	98.5788454177693
maker-tulip_contig_47_pilon_pilon-augustus-gene-0.22-mRNA-1	3.48959183861517	4.39159479417281	8.96208186686577	2.65013501573216	3.47036347047067	3.03720715995793	7.83739362833367	3.04568614506212	5.14908505834683	8.71387720168021	10.0130917853098	8.00332057783971	4.19015882881666	3.49634301287965	5.00796781796393	6.19250904318124	3.84751364595847	3.73107183852115
maker-tulip_contig_276_pilon_pilon-augustus-gene-2.8-mRNA-1	1.83662728348167	0.399235890379346	0.914498149680181	5.76794091659352	3.621248838752	3.94836930794531	2.23925532238105	4.46700634609111	1.89703133728568	2.32370058711472	2.36673078561868	1.88313425360934	1.84651067032599	3.99582058614817	3.11606886451089	1.3546113531959	2.40469602872404	3.53469963649372
maker-tulip_contig_236_pilon_pilon-augustus-gene-0.34-mRNA-1	0.734650913392668	0	0.914498149680181	3.58547678599056	3.92301957531467	2.42976572796634	0.559813830595262	0.203045743004141	0.813013430265289	1.74277544033604	1.63850592850524	0.941567126804672	0.710196411663841	0	0.445152694930127	1.16109544559648	0.480939205744809	1.374605414192
maker-tulip_contig_907_pilon_pilon-augustus-gene-5.0-mRNA-1	8.26482277566752	6.38777424606954	7.31598519744144	2.18246413060295	2.56505126078267	1.51860357997896	0.373209220396841	1.21827445802485	1.08401790702039	3.9212447407561	2.18467457134032	3.29548494381635	2.41466779965706	6.49320845249078	4.45152694930127	0.193515907599414	0.961878411489618	0.392744404054858
augustus_masked-tulip_contig_272_pilon_pilon-processed-gene-4.84-mRNA-1	0	0	0	5.61205062155045	2.26328052422	4.70767109793479	1.67944149178579	1.21827445802485	0.813013430265289	0	0	0	0.35509820583192	0	0	1.54812726079531	0.480939205744809	1.17823321216457
maker-tulip_contig_550_pilon_pilon-augustus-gene-0.17-mRNA-1	0.367325456696334	0.598853835569019	0.182899629936036	48.4818817583942	50.9992544790907	39.3318327214552	9.70343973031787	10.3553328932112	8.40113877940799	1.4523128669467	7.2822485711344	7.84639272337227	1.70447138799322	1.99791029307409	1.00159356359279	12.5785339939619	10.5806625263858	14.5315429500297
augustus_masked-tulip_contig_42_pilon_pilon-processed-gene-1.76-mRNA-1	34.3449302011072	39.1251172571759	34.5680300579108	52.690919724557	53.4134203715921	61.503444989148	60.6464983144867	58.883265471201	55.5559177347948	10.3114213553216	10.5592604281449	7.21868130550249	155.604033795547	103.891335239852	108.839833910416	387.225331106427	139.472369665995	359.361129710195
maker-tulip_contig_807_pilon_pilon-augustus-gene-1.44-mRNA-1	2.93860365357067	2.59503328746575	3.84089222865676	6.07972150667965	6.33718546781601	5.92255396191796	3.54548759376999	4.06091486008283	4.87808058159174	10.3114213553216	11.4695414995367	8.63103199570949	10.7949854572904	12.9864169049816	9.68207111473026	10.4498590103683	9.61878411489618	11.1932155155634
maker-tulip_contig_356_pilon_pilon-augustus-gene-1.47-mRNA-1	4.59156820870418	3.39350506822444	2.19479555923243	2.33835442564602	3.92301957531467	2.58162608596424	4.10530142436525	3.04568614506212	2.71004476755096	7.69725819481752	9.28486692819636	5.80633061529548	5.39749272864519	3.99582058614817	5.00796781796393	3.67680224438886	5.2903312631929	4.51656064663087
maker-tulip_contig_307_pilon_pilon-augustus-gene-1.145-mRNA-1	4.22424275200784	2.79465123265542	3.10929370891261	3.58547678599056	3.621248838752	3.79650894994741	3.73209220396841	5.07614357510353	3.52305819781625	6.24494532787082	7.10019235685604	6.74789774210015	9.800710480961	4.99477573268521	7.79017216127722	2.90273861399121	5.77127046893771	2.55283862635658
maker-tulip_contig_806_pilon_pilon-augustus-gene-2.31-mRNA-1	74.3834049810077	60.4842373924709	63.1003723279325	584.900387001591	542.583784339675	606.985850917592	394.295541349263	380.913813875769	422.495979261195	30.2081076324914	32.4060061415481	28.4039416586076	197.363582801381	157.834913152853	345.104626744581	473.146394080567	478.05357051034	672.182047539889
augustus_masked-tulip_contig_584_pilon_pilon-processed-gene-2.46-mRNA-1	0.734650913392668	1.39732561632771	1.09739777961622	2.18246413060295	1.20708294625067	1.82232429597476	1.11962766119052	1.62436594403313	1.08401790702039	3.77601345406143	2.36673078561868	2.19698996254423	2.84078564665536	5.99373087922226	3.56122155944102	2.12867498359355	3.36657444021366	2.94558303041143
maker-tulip_contig_674_pilon_pilon-augustus-gene-0.41-mRNA-1	85.9541568669422	59.0869117761432	81.2074356916	28.3720336978384	24.5943150298574	24.6013779956592	33.7754344459141	28.0203125345715	29.5394879663055	44.1503111551797	39.6882547126825	43.1551599785475	40.1971169001734	25.9728338099631	35.16706289948	43.7345951174675	35.5895012251159	31.4195523243886
augustus_masked-tulip_contig_2_pilon_pilon-processed-gene-6.10-mRNA-1	1.6529645551335	1.99617945189673	1.46319703948829	7.01506327693806	5.43187325812801	4.70767109793479	3.54548759376999	2.23350317304556	2.71004476755096	8.56864591498554	7.82841721396948	12.3973005029282	4.11913918765028	1.99791029307409	3.33864521197595	5.22492950518417	4.32845285170328	9.22949349528916
augustus_masked-tulip_contig_714_pilon_pilon-processed-gene-0.101-mRNA-1	0	0.598853835569019	0	0.155890295043068	0.150885368281334	0.151860357997896	4.47851064476209	8.52792120617394	2.71004476755096	53.8808073637226	19.6620711420629	22.5976110433121	4.82933559931412	2.49738786634261	8.23532485620735	21.0932339283361	16.3519329953235	15.5134039601669
augustus_masked-tulip_contig_474_pilon_pilon-processed-gene-5.5-mRNA-1	68.6898604022145	45.9121273936248	48.2855023031135	15.7449197993499	16.295619774384	19.1344051077349	13.0623227138894	11.9796988372443	8.67214325616309	36.1625903869729	29.1289942845376	30.7578594756193	11.1500836631223	14.9843271980556	12.9094281529737	11.0304067331666	13.9472369665995	19.8335924047703
maker-tulip_contig_872_pilon_pilon-augustus-gene-0.80-mRNA-1	1.83662728348167	0.399235890379346	1.09739777961622	8.2621856372826	6.18630009953467	7.28929718389903	12.6891134934926	19.2893455853934	10.5691745934488	0.580925146778681	2.18467457134032	1.41235069020701	2.27262851732429	2.49738786634261	1.00159356359279	3.87031815198828	2.40469602872404	3.73107183852115
maker-tulip_contig_80_pilon_pilon-augustus-gene-0.144-mRNA-1	1.101976370089	3.39350506822444	2.19479555923243	4.3649282612059	3.77213420703334	5.61883324592216	6.15795213654788	6.49746377613252	3.79406267457135	2.03323801372538	1.09233728567016	1.7262063991419	3.40894277598644	4.49529815941669	6.56600225021937	15.2877567003537	12.9853585551098	12.9605653338103
augustus_masked-tulip_contig_584_pilon_pilon-processed-gene-3.74-mRNA-1	347.489882034732	388.656139284293	374.944241368874	3.11780590086136	5.58275862640934	3.34092787595372	16.2346010872626	32.8934103666709	28.4554700592851	82.2009082691833	85.3843644965509	91.4889391545206	120.165232853522	127.866258756741	130.54102778826	4.45086587478652	9.13784490915137	3.73107183852115
augustus_masked-tulip_contig_732_pilon_pilon-processed-gene-1.2-mRNA-1	6.06087003548951	3.59312301341411	4.93829000827298	1.40301265538761	1.96150978765734	2.27790536996845	2.05265071218263	1.42132020102899	0.542008953510193	1.4523128669467	1.63850592850524	1.09849498127212	1.13631425866215	0.998955146537043	1.55803443225544	0.193515907599414	0.480939205744809	0.392744404054858
augustus_masked-tulip_contig_15_pilon_pilon-processed-gene-0.13-mRNA-1	0	0.798471780758692	0	25.8777889771493	31.5350419707987	23.9939365636676	7.83739362833367	7.71573823415737	13.0082148842446	2.32370058711472	3.09495564273212	4.08012421615358	2.34364815849067	1.99791029307409	2.00318712718557	6.9665726735789	3.84751364595847	8.05126028312459
augustus_masked-tulip_contig_323_pilon_pilon-processed-gene-3.5-mRNA-1	1.101976370089	2.59503328746575	1.64609666942433	0.155890295043068	0.301770736562667	0.911162147987378	4.66511525496052	4.67005208909525	2.16803581404077	1.4523128669467	1.27439349994852	1.25542283573956	1.70447138799322	0	2.1144753009181	1.54812726079531	2.88563523446885	1.57097761621943
augustus_masked-tulip_contig_157_pilon_pilon-processed-gene-0.6-mRNA-1	0.918313641740835	0.798471780758692	1.28029740955225	24.6306666168047	30.4788443928294	23.6902158476718	26.8710638685726	27.2081295625549	24.3904029079587	36.5982842470569	32.4060061415481	33.4256330015659	30.6094653427115	23.974923516889	26.4865853483426	25.9311316183214	25.0088386987301	22.1900588290995
maker-tulip_contig_362_pilon_pilon-augustus-gene-3.42-mRNA-1	0	0	0	1.24712236034454	0.754426841406668	1.06302250598527	0.933023050992103	0.812182972016566	1.08401790702039	2.75939444719873	5.4616864283508	4.55090777955591	5.18443380514604	6.49320845249078	5.11925599169646	16.835883961149	8.65690570340656	22.9755476372092
maker-tulip_contig_827_pilon_pilon-augustus-gene-1.23-mRNA-1	7.53017186227485	0.998089725948365	2.92639407897658	91.8193837803671	116.936160418033	122.7031692623	903.166313360356	547.614368882169	931.442386607266	1.01661900686269	0.72822485711344	0.313855708934891	2.91180528782175	3.49634301287965	2.55962799584823	12.5785339939619	6.25220967468252	5.69479385879544
augustus_masked-tulip_contig_674_pilon_pilon-processed-gene-8.19-mRNA-1	23.3251665002172	23.9541534227608	30.9100374591901	3.58547678599056	5.28098788984667	5.31511252992637	6.71776596714314	5.68528080411596	4.87808058159174	28.174869618766	16.9312279278875	13.3388676297329	2.41466779965706	2.99686543961113	4.8966796442314	0	0	0.196372202027429
maker-tulip_contig_748_pilon_pilon-augustus-gene-1.9-mRNA-1	0	0	0.365799259872072	6.39150209676579	11.4672879893813	13.3637115038149	4.66511525496052	8.52792120617394	5.42008953510193	0	0	0	2.48568744082344	5.99373087922226	2.4483398221157	2.32219089119297	4.80939205744809	0.981861010137145
maker-tulip_contig_248_pilon_pilon-augustus-gene-0.26-mRNA-1	2.38761546852617	1.99617945189673	2.37769518916847	4.98848944137818	2.56505126078267	4.40395038193899	1.86604610198421	2.23350317304556	2.71004476755096	7.98772076820686	7.64636099969112	12.7111562118631	11.0080443807895	9.98955146537043	6.12084955528925	24.5765202651256	13.9472369665995	14.1387985459749
maker-tulip_contig_272_pilon_pilon-augustus-gene-5.47-mRNA-1	220.946262202845	229.959872858503	218.747957403499	226.976269582707	237.040913569975	217.615893010985	176.527961247706	157.766542314218	167.209762157894	167.30644227226	130.898418066141	153.004658105759	208.371627182171	198.792074160871	202.433188019475	250.409584433641	230.369879551763	227.399009947763
maker-tulip_contig_424_pilon_pilon-augustus-gene-0.84-mRNA-1	0.918313641740835	0	0.365799259872072	4.3649282612059	4.07390494359601	2.88534680196003	3.91869681416683	2.63959465905384	1.89703133728568	4.79263246092412	2.36673078561868	4.55090777955591	2.41466779965706	7.49216359902782	1.78061077972051	3.67680224438886	2.40469602872404	4.12381624257601
maker-tulip_contig_738_pilon_pilon-augustus-gene-1.16-mRNA-1	0	0	0	0	0	0	0	0	0	0	0	0	0	0	0	58.8288359102218	50.4986166032049	36.5252295771018
maker-tulip_contig_145_pilon_pilon-augustus-gene-4.67-mRNA-1	17.2642964647277	26.7488046554162	21.9479555923243	68.2799492288638	79.8183598208254	79.7266879488956	13.8087411546831	10.3553328932112	12.1952014539793	14.958822529551	9.83103557103144	10.8280219582537	8.0252194518014	9.4900738921019	10.5723765045905	30.9625452159062	19.7185074355372	24.742897455456
maker-tulip_contig_441_pilon_pilon-augustus-gene-4.27-mRNA-1	0	0	0	0	0.452656104844001	0.151860357997896	0.746418440793682	0	0.542008953510193	2.17846930042005	1.27439349994852	0.784639272337227	14.6300460802751	21.4775356505464	19.1415658819955	116.303060467248	199.108831178351	180.26968146118
maker-tulip_contig_895_pilon_pilon-augustus-gene-3.7-mRNA-1	0	0	0	6.85917298189499	5.13010252156534	3.49278823395162	3.17227837337315	6.49746377613252	3.25205372106116	3.19508830728274	2.7308432141754	3.4524127982838	1.70447138799322	0.499477573268521	2.55962799584823	9.28876356477186	8.65690570340656	7.06939927298744
augustus_masked-tulip_contig_441_pilon_pilon-processed-gene-0.5-mRNA-1	39.3038238665077	32.7373430111064	61.6371752884442	32.8928522540874	33.9492078633	34.9278823395162	8.21060284873051	8.73096694917808	8.40113877940799	54.606963797196	54.616864283508	64.9681317495224	3.33792313482005	0.998955146537043	1.78061077972051	6.19250904318124	5.2903312631929	4.90930505068572
maker-tulip_contig_381_pilon_pilon-augustus-gene-0.123-mRNA-1	0.183662728348167	0.199617945189673	0.182899629936036	0.77945147521534	0.754426841406668	0.303720715995793	0.373209220396841	1.21827445802485	0.542008953510193	11.3280403621843	1.8205621427836	4.39397992508847	0.568157129331073	0	0.445152694930127	0.387031815198828	0	0.589116606082287
augustus_masked-tulip_contig_854_pilon_pilon-processed-gene-0.26-mRNA-1	3.85691729531151	8.98280753353528	3.29219333884865	47.0788691030065	49.0377446914334	36.7502066354909	15.8613918668658	24.5685349035011	19.5123223263669	6.8258704746495	6.73607992829932	7.68946486890482	9.51663191629546	12.486939331713	11.6852582419158	12.1915021787631	12.0234801436202	18.4589869905783
maker-tulip_contig_809_pilon_pilon-augustus-gene-4.5-mRNA-1	13.223716441068	4.59121273936248	12.6200744655865	39.2843543508531	59.4488351028454	36.1427652034993	40.4932004130573	58.883265471201	28.4554700592851	3.48555088067208	1.63850592850524	1.56927854467445	18.5361263444262	18.4806702109353	31.8284176875041	73.9230767029761	80.7977865651279	62.4463602447224
augustus_masked-tulip_contig_39_pilon_pilon-processed-gene-1.4-mRNA-1	0	0.399235890379346	0.182899629936036	0.155890295043068	0.754426841406668	0.151860357997896	0	0.406091486008283	0	0.29046257338934	0.36411242855672	0.156927854467445	0.426117846998304	0	0.222576347465064	6.57954085838007	10.5806625263858	5.49842165676801
augustus_masked-tulip_contig_146_pilon_pilon-processed-gene-0.34-mRNA-1	24.6108055986544	12.5759305469494	23.5940522617487	94.6254090911423	90.5312209688001	82.7638951088535	56.7278015003199	39.3908741428034	44.4447341878358	35.8721278135835	31.859837498713	31.5424987479565	68.3208948020615	66.4305172447133	61.4310719003575	75.8582357789702	95.2259627374722	120.179787640787
maker-tulip_contig_198_pilon_pilon-augustus-gene-3.6-mRNA-1	58.9557357997616	69.8662808163855	72.6111530846063	87.6103458142042	68.5019571997254	81.5490122448703	64.1919859082567	55.6345335831347	84.0113877940799	80.3129015421526	98.6744681388712	84.7410414124205	74.9257214305352	53.4441003397318	70.4454139726926	198.547321196999	184.199715800262	199.121412855813
maker-tulip_contig_113_pilon_pilon-augustus-gene-0.10-mRNA-1	321.960762794337	193.429788888793	236.489221507295	46.9229788079635	79.5165890842628	67.2741385930681	131.929459410283	163.045731632326	129.269135412181	36.4530529603622	25.1237575704137	31.3855708934891	78.6897624123535	65.9310396714448	76.9001280491794	11.6109544559648	13.4662977608547	13.5496819398926
augustus_masked-tulip_contig_565_pilon_pilon-processed-gene-0.2-mRNA-1	11.01976370089	6.78701013644888	8.23048334712163	17.3038227497805	14.937651459852	15.0341754417917	12.875718103691	11.5736073512361	18.4283044193466	32.9675020796901	33.1342309986615	39.5458193257962	19.7434602442548	19.4796253574723	12.2416991105785	24.1894884499267	15.8709937895787	22.5828032331543
augustus_masked-tulip_contig_146_pilon_pilon-processed-gene-0.39-mRNA-1	154.921347988962	94.4592116637533	104.772224012559	33.3792299746217	51.3885387292566	45.4685097881502	98.1540249643692	95.7360678264527	93.1144281682836	16.3457813174851	18.9848220249474	12.1932942921205	60.9057340678793	63.4136727021715	76.9791426525295	0.22447845281532	6.66581739162305	5.67319291657242
maker-tulip_contig_799_pilon_pilon-augustus-gene-0.9-mRNA-1	0.367325456696334	0.199617945189673	0.548698889808108	0.155890295043068	0.150885368281334	0.151860357997896	0	0.203045743004141	0.542008953510193	0.14523128669467	0.18205621427836	0	0.213058923499152	0	0.779017216127722	247.893877634849	324.153024672001	300.253096899939
augustus_masked-tulip_contig_102_pilon_pilon-processed-gene-0.16-mRNA-1	24.9781310553507	22.1575919160537	21.2163570725802	37.5695611053794	32.7421249170494	35.3834634135099	39.3735727518668	58.0710824991844	30.6235058733259	45.6026240221264	54.0706956406729	43.6259435419498	41.1913918765028	33.4649974089909	37.7266908953283	70.2462744585872	56.2698870721427	67.1592930933807
augustus_masked-tulip_contig_209_pilon_pilon-processed-gene-2.4-mRNA-1	0.918313641740835	0.598853835569019	1.28029740955225	44.1169534971882	27.15936629064	25.0569590696529	55.4215692289309	122.639628774501	53.9298908742642	230.191589411052	176.776584064288	156.927854467445	70.8065822428849	43.4545488743614	61.319783726625	89.791381126128	60.5983399238459	53.4132389514607
maker-tulip_contig_640_pilon_pilon-augustus-gene-2.4-mRNA-1	0.550988185044501	0.199617945189673	0.182899629936036	17.3038227497805	12.8252563039134	19.8937068977244	23.1389716646042	19.8984828144059	16.2602686053058	185.169890535704	233.396066704858	220.012851963358	15.0561639272734	13.9354242941917	12.4642754580436	27.8662906943156	27.4135347274541	21.7973144250446
maker-tulip_contig_854_pilon_pilon-augustus-gene-1.46-mRNA-1	15.427669181246	28.1461302717439	18.6557622534757	16.8361518646513	17.9553588254787	16.2490583057749	22.3925532238105	26.8020380765467	28.7264745360402	29.3367199123234	36.5932990699504	32.4840658747612	51.2761809221293	56.4409657793429	56.8682567773237	23.6089407271285	22.604142670006	13.74605414192
augustus_masked-tulip_contig_276_pilon_pilon-processed-gene-3.83-mRNA-1	21.4885392167355	36.5300839697102	25.240148931173	2.33835442564602	3.168592733908	3.64464859194951	3.73209220396841	2.23350317304556	3.25205372106116	10.7471152154056	2.91289942845376	4.08012421615358	2.84078564665536	6.49320845249078	4.78539147049887	3.48328633678945	2.88563523446885	4.90930505068572
augustus_masked-tulip_contig_401_pilon_pilon-processed-gene-0.11-mRNA-1	517.745231213483	562.922605434878	481.574725621583	391.908201738273	451.147251161187	384.814147166669	303.792305403029	329.94933238173	289.974790127953	757.962085259484	781.203215468443	841.290227799974	270.65585248509	269.717889565001	249.619373682069	141.460128455171	144.762700929188	153.759434187477
maker-tulip_contig_309_pilon_pilon-augustus-gene-0.6-mRNA-1	0	0	0.182899629936036	0.311780590086136	0	0	0	0	0	0	0	0	0.994274976329377	0.499477573268521	0.667729042395191	3.28977042919003	5.77127046893771	4.51656064663087
maker-tulip_contig_199_pilon_pilon-augustus-gene-3.43-mRNA-1	0.918313641740835	3.19388712303477	4.02379185859279	28.6838142879245	35.9107176509574	26.8792833656277	36.9477128192873	20.5076200434183	21.4093536636526	3.34031959397741	4.00523671412392	4.23705207062102	6.6758462696401	6.49320845249078	6.24215366465771	3.67680224438886	3.84751364595847	7.26577147501487
augustus_masked-tulip_contig_145_pilon_pilon-processed-gene-5.9-mRNA-1	0	0	0	3.58547678599056	1.20708294625067	2.88534680196003	3.54548759376999	0.609137229012424	3.25205372106116	0	0	0	10.6529461749576	2.99686543961113	0.333864521197595	9.8693112875701	0.480939205744809	0
maker-tulip_contig_218_pilon_pilon-augustus-gene-0.29-mRNA-1	0	0	0	284.811569043685	261.031687126707	261.807257188373	504.952075196926	496.64988738813	406.7777196094	0.871387720168021	1.8205621427836	1.56927854467445	12.7835354099491	11.9874617584445	13.9110217165665	42.3799837642716	33.6657444021366	38.4889515973761
augustus_masked-tulip_contig_130_pilon_pilon-processed-gene-0.44-mRNA-1	397.446144145433	379.872949695948	340.559110940899	149.966463831431	169.444268579938	141.078272580046	98.7138387949645	112.893433110303	112.466857853365	177.182169767498	171.496953850215	187.685713943065	184.366988467933	182.808791816279	187.743149086781	98.693112875701	113.02071335003	109.379316529278
maker-tulip_contig_46_pilon_pilon-augustus-gene-0.11-mRNA-1	0	0.798471780758692	0.182899629936036	0.623561180172272	3.168592733908	2.58162608596424	68.1106827224235	73.9086504535075	74.2552266308964	94.1098737781463	79.5585656396433	82.7009793043437	15.8373799801036	20.4785805040094	99.6029154906159	2.70922270639179	2.40469602872404	1.96372202027429
maker-tulip_contig_429_pilon_pilon-augustus-gene-1.26-mRNA-1	30.6716756341439	20.161412464157	29.8126396795739	12.0035527183162	4.07390494359601	14.2748736518023	8.39720745892893	19.4923913283976	24.9324118614689	8.07485954022366	14.5644971422688	15.5358575922771	0.213058923499152	0.998955146537043	4.78539147049887	3.67680224438886	0.961878411489618	11.3895877175909
augustus_masked-tulip_contig_855_pilon_pilon-processed-gene-1.12-mRNA-1	13.7747046261125	15.3705817796048	9.51078075667388	11.379991538144	16.1447344061027	13.5155718618128	9.14362589972261	6.09137229012424	8.13013430265289	10.3114213553216	10.5592604281449	8.47410414124205	15.5533014154381	17.9811926376668	18.5851250133328	26.7051952487191	16.8328722010683	17.6734981824686
maker-tulip_contig_331_pilon_pilon-augustus-gene-0.28-mRNA-1	839.522331279472	706.847143916632	836.948706587301	25.254227796977	24.2925442932947	29.7646301675877	26.3112500379773	43.4517890028863	49.3228147694276	128.093994864699	135.4498234231	150.650740288748	37.4273508946844	44.9529815941669	43.8475404506175	52.4428109594411	62.0411575410804	45.7547230723909
maker-tulip_contig_441_pilon_pilon-augustus-gene-2.10-mRNA-1	62.4453276383768	49.3056324618492	37.6773237668234	17.7714936349098	22.3310345056374	23.6902158476718	29.296923801152	27.2081295625549	19.783326803122	56.6402018109214	56.9835950691267	67.322049566534	44.9554328583211	46.4514143139725	45.1829985354079	14.3201771623566	16.8328722010683	14.9242873540846
maker-tulip_contig_537_pilon_pilon-augustus-gene-1.6-mRNA-1	0.550988185044501	1.59694356151738	2.37769518916847	14.9654683241345	12.8252563039134	14.1230132938044	20.1532979014294	21.522848758439	16.2602686053058	36.1625903869729	31.4957250701563	34.6810558373054	2.41466779965706	1.99791029307409	1.55803443225544	8.90173174957303	3.84751364595847	7.65851587906973
augustus_masked-tulip_contig_583_pilon_pilon-processed-gene-1.34-mRNA-1	14.1420300828089	10.1805152046733	12.8029740955225	7.01506327693806	4.52656104844001	8.5041800478822	5.59813830595262	3.85786911707869	8.40113877940799	14.3778973827723	20.7544084277331	15.5358575922771	13.8488300274449	12.486939331713	17.2496669285424	4.06383405958769	8.17596649766175	8.64037688920687
maker-tulip_contig_272_pilon_pilon-augustus-gene-4.3-mRNA-1	20.3865628466465	20.3610304093466	23.9598515216207	21.9805316010726	20.6712954545427	19.7418465397265	15.4881826464689	14.8223392393023	17.6152909890813	22.8013120110632	22.5749705705167	26.9915909684006	23.7205601495723	22.4764907970835	24.3721100474245	17.4164316839472	16.8328722010683	21.993686627072
maker-tulip_contig_597_pilon_pilon-augustus-gene-3.4-mRNA-1	134.624779879206	116.17764410039	123.823049466696	13.2506750786608	19.011556403448	21.8678915516971	20.3399025116278	25.5837636185218	20.5963402333873	23.2370058711472	20.208239784898	24.7946010058564	33.3792313482005	27.4712665297687	42.8459468870247	22.8348770967308	13.4662977608547	21.7973144250446
maker-tulip_contig_831_pilon_pilon-augustus-gene-4.60-mRNA-1	2.203952740178	1.59694356151738	2.37769518916847	4.3649282612059	5.88452936297201	3.64464859194951	2.05265071218263	0.609137229012424	4.33607162808154	5.95448275448148	2.18467457134032	3.92319636168613	6.32074806380818	1.99791029307409	5.34183233916152	7.93415221157596	5.77127046893771	8.24763248515201
augustus_masked-tulip_contig_583_pilon_pilon-processed-gene-2.6-mRNA-1	0.734650913392668	1.99617945189673	1.28029740955225	4.05314767111977	3.77213420703334	3.79650894994741	1.11962766119052	1.62436594403313	0.271004476755096	1.88800672703071	1.63850592850524	2.35391781701168	1.06529461749576	0.998955146537043	1.11288173732532	1.16109544559648	0.961878411489618	0.589116606082287
augustus_masked-tulip_contig_327_pilon_pilon-processed-gene-4.17-mRNA-1	0.550988185044501	0.399235890379346	0.182899629936036	1.71479324547375	2.86682199734534	1.97418465397265	0.373209220396841	0.203045743004141	1.35502238377548	4.06647602745077	3.09495564273212	4.86476348849081	0.35509820583192	0	0.111288173732532	0.387031815198828	2.40469602872404	0.785488808109716
maker-tulip_contig_697_pilon_pilon-augustus-gene-0.20-mRNA-1	16.3459828229869	18.9637047930189	13.3516729853306	24.1629957316755	13.4287977770387	16.097197947777	19.0336702402389	16.2436594403313	23.5773894776934	11.908965508963	17.4773965707226	14.1235069020701	22.2291476850782	22.975968370352	25.9301444796799	17.9969794067455	15.8709937895787	18.6553591926057
maker-tulip_contig_46_pilon_pilon-augustus-gene-0.15-mRNA-1	0.550988185044501	0	0	4.05314767111977	9.65666357000535	7.89673861589061	5.59813830595262	7.10660100514495	4.33607162808154	36.8887468204462	29.311050498816	24.7946010058564	19.3883620384229	19.4796253574723	18.4738368396003	49.7335882530493	33.1848051963918	32.7941577385806
augustus_masked-tulip_contig_654_pilon_pilon-processed-gene-1.34-mRNA-1	0	0	0	8.57396622736874	8.75135136031735	10.326504343857	17.3542287484531	14.6192934962982	20.8673447101424	34.2745836599422	24.0314202847435	31.0717151845542	1.42039282332768	0.499477573268521	0.333864521197595	1.3546113531959	0.961878411489618	1.57097761621943
maker-tulip_contig_157_pilon_pilon-augustus-gene-0.45-mRNA-1	0.183662728348167	0.998089725948365	2.37769518916847	1.09123206530148	2.41416589250134	2.42976572796634	1.67944149178579	1.21827445802485	2.71004476755096	7.40679562142818	6.18991128546424	5.49247490636059	3.1248642113209	4.99477573268521	2.67091616958076	2.51570679879238	1.44281761723443	3.73107183852115
maker-tulip_contig_620_pilon_pilon-augustus-gene-0.41-mRNA-1	0.918313641740835	2.59503328746575	2.37769518916847	0	0.452656104844001	0.911162147987378	0	0.406091486008283	0.813013430265289	1.30708158025203	0.72822485711344	1.56927854467445	3.19588385248728	2.49738786634261	1.66932260598798	1.93515907599414	5.77127046893771	2.16009422230172
maker-tulip_contig_318_pilon_pilon-augustus-gene-0.29-mRNA-1	84.4848550401568	64.4765962962644	79.7442386521117	14.1860168489192	22.0292637690747	14.5785943677981	23.6987854951994	30.0507699646129	22.493371570673	14.3778973827723	13.8362722851554	16.0066411556794	23.4364815849067	27.4712665297687	26.4865853483426	5.41844541278359	9.61878411489618	7.85488808109716
augustus_masked-tulip_contig_303_pilon_pilon-processed-gene-2.1-mRNA-1	2.71086187041895	3.24379160933219	2.69228255265845	9.3035328081703	8.84640914233458	11.9969682818338	7.22533050688285	8.41015467523154	13.1897878836705	7.36467854828673	7.39148229970142	7.03821427286492	5.85059803928672	1.27366781183473	6.14978448045971	13.9428211425378	6.73795827248477	8.44204096515917
maker-tulip_contig_852_pilon_pilon-augustus-gene-0.20-mRNA-1	0	0	0	11.535881833187	11.1655172528187	10.6302250598527	4.66511525496052	4.46700634609111	3.52305819781625	8.13295205490153	4.73346157123736	4.55090777955591	0.0710196411663841	0	0	0	0	0
maker-tulip_contig_674_pilon_pilon-augustus-gene-0.52-mRNA-1	2.57127819687434	1.19770767113804	3.65799259872072	5.45616032650738	5.58275862640934	6.83371610990534	24.2585993257947	20.7106657864224	21.9513626171628	1444.3251461785	1026.43293610139	1368.88167451953	5.53953201097796	8.49111874556486	8.90305389860254	136.235198949987	216.422642585164	249.392696574835
maker-tulip_contig_907_pilon_pilon-augustus-gene-2.1-mRNA-1	70.342824957348	88.0315138286458	87.0602238495532	43.0257214318868	41.7952470139294	42.2171795234152	52.9957092963515	55.4314878401306	62.8730386071824	62.0137594186242	69.7275300686119	67.4789774210015	46.0917471169833	44.4535040208984	49.8571018321742	45.6697541934616	66.8505495985284	55.9660775778172
maker-tulip_contig_598_pilon_pilon-augustus-gene-0.50-mRNA-1	8.08116004731935	7.3858639720179	12.0713755757784	37.1018902202502	39.6828518579907	39.7874137954488	37.5075266498825	36.9543252267537	34.9595775014074	54.7521950838907	43.8755476410848	50.5307691385174	56.1765361626098	58.9383536456855	51.1925599169646	76.8258153169673	52.4223734261842	83.4581858616573
augustus_masked-tulip_contig_68_pilon_pilon-processed-gene-0.77-mRNA-1	29.2023738073586	27.5472764361749	27.4349444904054	29.3073754680968	27.612022395484	30.2202112415814	26.1246454277789	22.7411232164638	22.2223670939179	40.8099915612023	43.3293789982497	42.5274485606777	53.4777897982872	54.4430554862688	47.0748974888609	47.217881454257	42.803589311288	46.9329562845555
maker-tulip_contig_473_pilon_pilon-augustus-gene-0.9-mRNA-1	286.330193494792	99.6093546496468	184.911525865333	112.241012431009	80.4219012939508	106.605971314523	140.513271479411	120.406125601456	152.575520413119	275.794213433179	278.181895417334	280.900859496727	112.850209813384	89.9059631883338	107.393087651893	163.520941921505	145.724579340677	129.998397742158
maker-tulip_contig_560_pilon_pilon-augustus-gene-3.45-mRNA-1	83.1992159417197	104.200567389009	100.777696094756	92.4429449605393	88.8714819177055	87.6234265647862	57.1010107207167	64.3655005323128	68.5641326190394	50.2500251963559	54.616864283508	46.9214284857662	44.6003346524892	48.9488021803151	55.3102223450683	39.8642769654792	62.5220967468252	53.0204945474058
maker-tulip_contig_860_pilon_pilon-augustus-gene-1.9-mRNA-1	0.183662728348167	0	0	577.573543134567	474.534483244794	611.541661657529	1102.64664166247	884.061165040032	965.046941724898	111.247165608117	125.43673163779	126.797706409696	102.055224356094	70.4263378308615	98.7126101007557	333.621424701389	317.419875791574	455.19076429958
maker-tulip_contig_828_pilon_pilon-augustus-gene-0.4-mRNA-1	0	0	0	2.80602531077522	1.96150978765734	2.42976572796634	5.97134752634946	7.10660100514495	7.3171208723876	1.4523128669467	0.72822485711344	0.470783563402336	1.49141246449407	0.499477573268521	1.33545808479038	1.93515907599414	0.961878411489618	1.374605414192
maker-tulip_contig_298_pilon_pilon-augustus-gene-0.27-mRNA-1	4.22424275200784	1.19770767113804	3.47509296878469	0.311780590086136	0.301770736562667	0.303720715995793	0.373209220396841	1.21827445802485	0.542008953510193	0.726156433473351	0	0.627711417869781	0.497137488164689	1.99791029307409	0.111288173732532	0.387031815198828	0.480939205744809	0.589116606082287
augustus_masked-tulip_contig_516_pilon_pilon-processed-gene-3.91-mRNA-1	0	0	0	2.33835442564602	1.20708294625067	2.12604501197055	25.0050177665884	36.1421422547372	27.1004476755096	0	0	0	0.0710196411663841	0	0	0	0	0
maker-tulip_contig_537_pilon_pilon-augustus-gene-1.11-mRNA-1	4.40790548035601	1.39732561632771	7.86468408724955	2.80602531077522	4.82833178500267	3.18906751795582	2.98567376317473	3.24873188806626	2.71004476755096	10.4566526420163	10.7413166424232	11.2988055216561	2.98282492898813	0.998955146537043	3.89508608063861	4.64438178238593	1.92375682297924	4.32018844460344
maker-tulip_contig_446_pilon_pilon-augustus-gene-1.22-mRNA-1	357.040343908837	135.141348893409	154.733086925887	11.2241012431009	6.78984157266001	6.68185575190744	10.63646278131	6.29441803312838	7.8591298258978	12.6351219424363	12.0157101423718	13.4957954842003	8.94847478696439	12.486939331713	5.78698503409165	9.48227947237127	7.69502729191694	9.03312129326173
maker-tulip_contig_16_pilon_pilon-augustus-gene-1.4-mRNA-1	11.3870891575864	2.59503328746575	16.0951674343712	35.3870969747764	39.833737226272	27.1830040816234	7.65078901813524	5.07614357510353	10.0271656399386	53.299882216944	44.2396600696415	58.5340897163571	3.05384457015451	5.49425330595373	4.22895060183621	4.2573499671871	3.84751364595847	3.73107183852115
maker-tulip_contig_75_pilon_pilon-augustus-gene-0.56-mRNA-1	50.1399248390496	64.8758321866437	44.8104093343288	212.010801258572	157.826095222275	127.866421434229	208.810558812033	268.629517994479	214.906550066791	29.1914886256287	44.4217162839199	39.3888914713288	144.311910850092	136.357377502306	146.232660284547	92.113572017321	90.4165706800241	85.0291634778767
maker-tulip_contig_272_pilon_pilon-augustus-gene-4.40-mRNA-1	1.101976370089	0.199617945189673	0.182899629936036	9.35341770258408	7.54426841406668	9.26348183787168	13.9953457648815	7.30964674814909	7.8591298258978	2.03323801372538	0.54616864283508	2.35391781701168	5.39749272864519	4.99477573268521	5.11925599169646	7.74063630397655	10.5806625263858	13.74605414192
augustus_masked-tulip_contig_190_pilon_pilon-processed-gene-1.10-mRNA-1	0	0.199617945189673	0	0.623561180172272	0.905312209688001	0.607441431991585	0.559813830595262	2.63959465905384	1.08401790702039	2.17846930042005	2.00261835706196	1.56927854467445	22.1581280439118	16.9822374911297	96.7094229735701	153.264598818736	146.205518546422	127.445559115801
maker-tulip_contig_63_pilon_pilon-augustus-gene-0.68-mRNA-1	2.93860365357067	2.39541534227608	1.64609666942433	5.92383121163658	9.05312209688001	4.70767109793479	4.66511525496052	5.27918931810768	4.87808058159174	5.08309503431346	3.82318049984556	3.4524127982838	4.75831595814773	3.99582058614817	5.56440868662659	1.54812726079531	3.84751364595847	4.32018844460344
maker-tulip_contig_323_pilon_pilon-augustus-gene-8.56-mRNA-1	15.0603437245497	4.19197684898313	10.6081785362901	24.1629957316755	34.7036347047067	22.7790536996845	12.6891134934926	11.7766530942402	17.6152909890813	32.9675020796901	25.3058137846921	30.9147873300867	8.52235693996609	12.486939331713	5.67569686035912	8.51469993437421	8.65690570340656	13.1569375358377
augustus_masked-tulip_contig_482_pilon_pilon-processed-gene-3.30-mRNA-1	0	0.399235890379346	0	404.067644751632	3.168592733908	420.956912370169	79.4935639445272	69.8477355934246	63.6860520374477	1.30708158025203	0.36411242855672	1.25542283573956	0.639176770497457	0.998955146537043	1.44674625852291	2.51570679879238	6.73314888042733	7.06939927298744
maker-tulip_contig_841_pilon_pilon-augustus-gene-0.51-mRNA-1	76.5873577211857	57.6895861598155	73.5256512342865	32.8928522540874	37.8722274386147	31.7388148215603	32.2825975643268	26.8020380765467	31.1655148268361	46.4740117422945	52.2501334978893	51.4723362653221	52.3414755396251	55.4420106328059	58.0924266883816	33.2847361070992	24.5278994929853	24.1537808493738
maker-tulip_contig_320_pilon_pilon-augustus-gene-3.44-mRNA-1	43.1607411618193	39.7239710927449	55.9672867604271	4.05314767111977	6.33718546781601	6.37813503591165	6.53116135694472	6.90355526214081	5.69109401185703	8.85910848837488	10.7413166424232	8.16024843230716	17.754910291596	14.4848496247871	27.3768907382028	5.22492950518417	6.73314888042733	4.90930505068572
[truncated: 10,959 more rows]
